# Supplementary material for: Ferroptosis-related long non-coding RNA signature predicts the prognosis of hepatocellular carcinoma
Source: publisher site journal article supplement (doi:10.18632/aging.204073), 2022-05-12
Supplement: Supplementary file [file aging-v14i9-204073-supplementary-material-SD2.pdf]

## SUPPLEMENTARY TABLE

Supplementary Table 2. The primer sequences for q-PCR.

| Gene      | Primer Sequence                                                  |
|-----------|------------------------------------------------------------------|
| LINC00205 | F: 5'-AGCCGTTTCGTCTTTACCTGG-3'<br>R: 5'-TCCAGGAGGACTCATGGGAG-3'  |
| LINC00942 | F: 5'-AGGAGCTGGCAAGACCTCTA-3'<br>R: 5'-GTTCAGTGACGCAGAATCGC-3'   |
| ZFPM2-AS1 | F: 5'-CCCAGGGAGAGTATGGAGTGA-3'<br>R: 5'-AGTTGCAAGATGACGCTCAGT-3' |
| GAPDH     | F: 5'-TGACTTCAACAGCGACACCCA-3'<br>R: 5'-CACCTGTTGCTGTAGCCAAA-3'  |
