# Supplementary material for: Ferroptosis-related long non-coding RNA signature predicts the prognosis of hepatocellular carcinoma
Source: Aging (Albany NY). 2022 May 12;14(9):4069–84. doi: 10.18632/aging.204073 (PMC9134948; doi:10.18632/aging.204073)
Supplement: Supplementary Tables 1, 3-7 [file aging-14-204073-s001.xlsx]

## Sheet: Supplementary Table 1
Supplementary Table 1. 246 ferroptosis-associated genes.
ID	TCGA-DD-A118-11A-11R-A131-07	TCGA-DD-A3A3-11A-11R-A22L-07	TCGA-DD-A1EJ-11A-11R-A155-07	TCGA-DD-A39X-11A-11R-A213-07	TCGA-FV-A3I0-11A-11R-A22L-07	TCGA-DD-A119-11A-11R-A131-07	TCGA-DD-A3A2-11A-11R-A213-07	TCGA-EP-A3RK-11A-11R-A22L-07	TCGA-EP-A26S-11A-12R-A16W-07	TCGA-DD-A1EC-11A-11R-A131-07	TCGA-BC-A10Y-11A-11R-A131-07	TCGA-BC-A10R-11A-11R-A131-07	TCGA-DD-A1EB-11A-11R-A131-07	TCGA-G3-A3CH-11A-11R-A22L-07	TCGA-DD-A114-11A-12R-A131-07	TCGA-DD-A39V-11A-11R-A213-07	TCGA-DD-A39W-11A-11R-A213-07	TCGA-DD-A11A-11A-11R-A131-07	TCGA-EP-A12J-11A-11R-A131-07	TCGA-DD-A1EH-11A-11R-A131-07	TCGA-DD-A3A1-11A-11R-A213-07	TCGA-BD-A3EP-11A-12R-A22L-07	TCGA-DD-A11C-11A-11R-A131-07	TCGA-DD-A1EG-11A-11R-A213-07	TCGA-BC-A10Q-11A-11R-A131-07	TCGA-DD-A3A5-11A-11R-A22L-07	TCGA-DD-A113-11A-12R-A131-07	TCGA-DD-A1EE-11A-11R-A131-07	TCGA-DD-A1EL-11A-11R-A155-07	TCGA-FV-A2QR-11A-11R-A213-07	TCGA-DD-A1EI-11A-11R-A131-07	TCGA-BC-A10Z-11A-11R-A131-07	TCGA-FV-A3I1-11A-11R-A22L-07	TCGA-FV-A23B-11A-11R-A16W-07	TCGA-DD-A3A6-11A-11R-A22L-07	TCGA-BC-A10T-11A-11R-A131-07	TCGA-FV-A3R2-11A-11R-A22L-07	TCGA-BC-A10W-11A-11R-A131-07	TCGA-BC-A216-11A-11R-A155-07	TCGA-DD-A3A4-11A-11R-A22L-07	TCGA-BC-A10X-11A-11R-A131-07	TCGA-BC-A10U-11A-11R-A131-07	TCGA-DD-A11B-11A-11R-A131-07	TCGA-DD-A11D-11A-12R-A131-07	TCGA-BC-A110-11A-11R-A131-07	TCGA-DD-A116-11A-12R-A26B-07	TCGA-BD-A2L6-11A-21R-A213-07	TCGA-DD-A39Z-11A-21R-A213-07	TCGA-ES-A2HT-11A-11R-A180-07
RPL8	214.456	376.034	237.142	230.865	179.489	126.354	255.135	203.029	239.552	119.469	227.841	146.864	146.084	182.156	135.614	213.169	196.323	157.429	178.264	207.971	412.375	176.377	166.26	228.652	171.85	164.946	161.682	181.091	174.018	335.729	186.422	298.637	181.539	218.58	298.005	182.931	248.428	254.692	156.1	348.56	148.364	224.427	179.046	168.238	191.584	216.556	278.217	228.204	229.216
IREB2	3.01647	1.77255	2.91421	2.44248	1.88424	3.17313	2.56504	2.54934	2.56671	3.55499	2.95979	2.86052	3.71997	2.65601	3.48676	1.89196	2.68865	3.31599	3.80946	1.79149	1.20348	2.43572	2.80049	1.78115	2.45755	2.01505	2.09558	2.96946	3.27712	2.86485	3.07595	1.99236	3.13787	3.05835	0.840269	2.31113	2.0327	1.99906	2.24345	3.19441	3.07692	2.73824	2.36961	2.74837	2.25507	3.01023	2.90971	1.60123	2.56243
ATP5MC3	28.938	22.3261	26.4465	25.7317	20.4765	17.3713	21.0717	21.7553	31.6055	15.0317	20.4568	20.6914	21.4416	23.7874	29.134	23.4118	25.011	19.3336	38.8158	21.6759	26.446	20.618	19.5476	23.0219	21.0921	20.715	16.3555	20.6333	33.1905	22.2301	25.4069	20.0346	15.6883	24.7616	17.7177	19.5062	26.4474	24.363	20.5096	26.8666	18.9392	24.6316	24.4119	23.6849	24.6667	35.0377	20.2316	19.7006	31.7386
CS	4.85876	3.79025	5.14385	4.25258	4.13626	5.89705	3.98223	3.81407	4.48862	5.26386	6.65172	5.80206	4.77497	4.11272	9.6245	3.64497	4.68932	4.96885	11.0134	4.0121	3.86685	5.13578	6.62989	3.77408	5.07197	4.06788	5.35008	5.51936	5.3422	6.75374	5.57399	5.25266	4.97444	7.195	2.37458	4.83627	5.18572	5.06275	4.0153	9.25336	4.47278	4.27492	5.23644	7.89508	4.79126	4.93324	6.6998	3.53772	11.4169
EMC2	4.12776	5.26804	6.13379	4.65244	3.5114	3.75305	4.3944	3.35563	3.09902	4.36063	4.97109	3.58375	4.4526	4.01364	4.29046	4.55154	3.72211	4.45584	3.9556	3.92173	3.89402	4.1633	4.19683	3.77585	4.04014	4.14937	3.67578	4.02682	4.6267	5.67227	3.65326	5.82192	4.15786	5.03113	2.15283	3.74312	4.4515	4.82548	4.51635	6.73538	4.75799	3.68571	2.87377	4.32448	4.92935	4.22087	5.26599	3.3764	5.88858
ACSF2	6.43153	5.61542	7.15806	7.61464	9.17673	6.71268	5.3914	8.10342	6.1797	4.70182	6.70619	7.35151	10.4218	10.311	13.5883	5.23727	9.03537	5.64025	13.9515	9.12312	9.12169	6.13894	10.3335	7.7847	9.59114	8.60649	7.87066	5.99183	10.3251	8.5194	9.42868	5.58166	8.93996	9.99444	6.67663	3.04986	5.0377	9.07468	4.71257	5.50933	8.56194	6.25983	6.33507	10.9214	8.87108	8.85644	5.8099	6.3609	11.9372
NOX1	0.0857117	0.132211	0.114879	0.153059	0.0792143	0.1182	0.195387	0.10922	0.113005	0.161517	0.135909	0.0421883	0.128466	0.0900094	0.150046	0.11354	0.137475	0.122336	0.0675869	0.20847	0.238748	0.100393	0.107387	0.103444	0.0774389	0.148448	0.116395	0.172626	0.147825	0.135928	0.0950369	0.183989	0.0609436	0.137556	0.244795	0.111923	0.137379	0.0999022	1.04537	0.222814	0.0899806	0.0960707	0.0888154	0.0919244	0.102662	0.114626	0.148546	0.22945	0.114915
CYBB	4.47203	6.86307	5.04927	2.22032	0.790576	10.0702	3.05831	1.52795	3.1758	7.87516	7.0144	8.20857	5.73617	4.92786	10.9137	2.2246	2.12579	9.2397	5.10116	2.30949	5.79653	4.09475	4.93851	4.17837	1.27522	0.469073	1.72086	8.75387	5.01897	8.46729	4.91942	2.10404	3.32784	6.20996	0.067393	2.45154	4.83525	3.41919	4.25552	9.83048	3.42424	1.77351	2.09481	6.72779	2.1803	2.80447	23.2689	0.636101	5.0667
NOX3	0	0	0	0	0	0	0	0	0	0	0	0	0	0	0	0	0	0	0.013951	0	0	0	0	0	0	0	0	0	0	0	0	0	0	0	0	0	0	0.00883772	0	0	0	0	0	0	0	0	0	0	0
NOX4	0.00444482	0.0274248	0.0165771	0.00940715	0.0179253	0.0115381	0.0126654	0.012083	0.0257848	0.0456867	0.032643	0.00500066	0.00969016	0.0124472	0.0259369	0.0219815	0.00247971	0.0138416	0.023366	0.0162162	0.0571429	0.0173539	0.00636443	0.00613074	0.0192759	0.00972399	0.0103474	0.004476	0.0126883	0.0877196	0.0162347	0.0411009	0.00948119	0.049285	0.0225681	0.0250023	0.0506607	0.0207228	0.0300035	0.0119274	0.0248864	0.042703	0.0368462	0.00635599	0.0121687	0.00750851	0.0616263	0.0144228	0.0132427
NOX5	0.00649723	0	0.0020193	0.00114591	0	0.00140548	0.00493699	0.00294374	0.00342646	0.00296812	0.00144594	0.00243658	0	0.00151622	0.00126378	0	0	0.00786837	0.00227703	0.00131689	0.00742478	0.00169114	0.0124043	0.00746803	0	0.00157934	0	0.0065428	0.0030912	0.00915889	0.00113006	0.00286092	0.00307982	0.0012639	0.00366544	0.00174034	0.00617113	0.00576984	0.00132902	0.00290582	0.00202098	0.00970997	0.00448833	0.00154848	0.00296461	0.00365853	0.00522217	0	0
DUOX1	0.0370159	0.035346	0.037389	0.0391707	0.0248799	0.0460419	0.0544959	0.050313	0.0309085	0.0739808	0.0473673	0.0503209	0.0907856	0.0345528	0.0395999	0.0523027	0.0516268	0.0288177	0.0389179	0.0300102	0.0925319	0.0553996	0.0530022	0.0680747	0.0512795	0.0652339	0.0765971	0.0403818	0.0792501	0.119579	0.0354097	0.0937203	0.0899245	0.0828079	0.054817	0.0322239	0.0659212	0.0451988	0.0321796	0.039318	0.0474948	0.0908819	0.111872	0.0308769	0.0443361	0.0451604	0.100412	0.066061	0.0845509
DUOX2	0.0137765	0.00242862	0.0899148	0.0116628	0.00555585	0.0178808	0.0298344	0.0543037	0.00871842	0.0736339	0.0680635	0.00464979	0.0135154	0.0385794	0.0337639	0.0136262	0.0230572	0.0958128	0.0144844	0.00837687	0.0165304	0.400178	0	0.577659	0.00398298	0.0060278	1.64205	0.141506	0.00524359	0.097101	0.0244405	0.294817	0.0685685	0.0611026	0.0349743	0.00664229	0.282637	0.00183513	0.184298	0.0147873	0.0874186	1.67121	0.251246	0.00394002	0.020744	0.0155148	0.0847077	0.0500669	1.05733
G6PD	0.869339	1.7901	1.28735	0.757604	1.03606	1.15204	0.824333	0.89367	0.920784	1.03123	1.9607	1.40133	1.11087	1.29907	1.59859	0.929011	0.81104	1.40289	1.29037	0.670752	1.08319	1.62577	0.847292	1.46106	0.897636	0.665919	1.34353	1.66259	0.879351	2.38916	1.15118	1.94936	1.08042	1.62859	0.284374	1.37955	2.066	1.67378	1.1073	2.35242	0.927122	1.55811	1.04465	1.31104	1.03001	0.851512	4.76049	0.597361	1.61499
PGD	15.2196	9.07492	20.7278	15.9606	22.2401	17.7382	9.6107	33.3523	21.4728	14.6045	14.0098	21.8609	28.5497	26.6571	38.7442	15.9222	16.63	18.482	54.4305	21.5027	16.7399	18.0619	26.8025	17.4391	32.0044	18.3135	18.4171	19.4569	24.77	17.8036	22.5991	13.0815	10.6722	18.3451	16.5514	13.6176	11.5967	22.9812	16.5153	26.5122	23.3068	18.6534	13.8775	27.3222	17.2571	16.0546	21.1743	14.365	30.3314
VDAC2	8.38651	11.9204	9.95973	6.77015	7.74996	7.38317	7.38491	6.1295	8.37049	6.84361	8.81153	8.5888	7.75218	6.54236	9.36812	6.07396	6.60905	8.4816	8.58567	7.62879	6.67031	7.98564	6.12088	6.06138	7.73812	6.29049	5.80871	6.29298	7.54238	10.7548	8.04679	9.16032	6.97166	8.24476	3.92561	7.75587	10.617	9.44783	6.55214	12.6798	7.45478	9.58886	6.03844	7.8808	9.77441	6.11479	8.24482	5.38039	9.42347
PIK3CA	1.42806	0.758796	1.36371	1.00391	1.20562	1.5695	1.20436	1.11532	1.00669	1.59608	1.70503	1.72811	1.56921	1.07637	1.65655	0.83601	0.997475	1.88135	1.31981	0.835073	0.402224	1.38939	1.13371	0.718788	1.45878	0.833533	1.21093	1.44097	1.25338	1.38602	1.35658	1.07063	1.40025	1.43324	0.387391	1.12904	0.980367	0.953052	0.894002	1.43704	1.46425	1.54533	0.942754	1.26189	1.05426	0.961382	1.44922	0.706284	1.04137
FLT3	0.097724	0.195245	0.088079	0.134437	0.0437896	0.12261	0.0965337	0.0664146	0.133996	0.129465	0.226182	0.117275	0.230802	0.360324	0.323142	0.0552329	0.0944997	0.138635	0.109595	0.154496	0.0390863	0.351019	0.111943	0.0629024	0.188356	0.0190037	0.0454997	0.131213	0.158081	0.293883	0.17337	0.0215154	0.277939	0.494266	0.0275657	0.10994	0.320226	0.0954618	0.0679647	0.231642	0.11247	0.141874	0.0540068	0.298119	0.111476	0.12106	1.13106	0.0465079	0.271745
SCP2	90.6667	48.2924	63.8477	54.5339	76.4096	80.1666	70.7677	72.0241	63.3503	72.4596	77.937	91.9495	107.882	111.366	98.0615	63.3522	107.552	86.5304	118.092	91.9024	25.9464	56.786	84.9623	73.5445	100.457	95.5814	95.1393	71.3173	81.9055	54.5708	81.322	36.8446	76.409	71.8359	55.5048	54.4454	41.2367	88.7903	95.5278	44.0656	105.694	68.6281	88.1722	96.6367	98.7995	63.9079	40.3513	62.09	67.4225
TP53	3.14601	3.9441	5.26964	4.97188	3.69239	4.61044	4.51559	4.90306	3.58689	5.24086	6.98145	4.14354	5.16273	3.18086	7.54002	3.62818	4.73153	5.51302	6.28963	5.21142	2.80846	5.24108	4.00199	4.96123	4.56768	3.70484	4.20945	5.40722	3.68465	6.90937	4.51875	7.62056	5.09055	5.40749	3.61181	6.23441	5.13928	4.06233	3.21902	12.2891	4.22694	4.19753	4.3656	4.93678	4.22637	3.56623	7.42401	4.13247	7.81845
ACSL4	2.0063	1.32167	1.4079	1.94654	1.16682	1.07724	1.45631	5.01485	2.68192	1.36322	1.48049	1.71547	1.68742	1.15621	113.352	2.75131	2.87717	7.95553	4.71616	0.626664	2.47614	20.3926	1.56037	1.238	8.3344	1.10885	21.0029	1.41213	6.59338	5.10863	0.888179	2.92928	1.7569	11.7529	0.446788	1.70386	1.29079	1.87921	6.38916	1.48762	1.45243	4.26085	4.94571	29.0671	6.67798	0.725405	3.37112	1.36233	56.0149
LPCAT3	4.49587	5.65611	5.72104	4.69691	5.80859	7.3611	3.71907	2.49035	4.06456	7.90623	5.28348	6.21616	5.45393	2.79825	6.38469	3.53686	4.35414	6.55084	6.47534	1.597	0.398106	4.31217	7.3818	2.34916	4.28161	4.00619	5.25981	6.85462	2.93568	3.80744	4.7157	4.63983	5.19463	5.5152	0.67453	3.88465	2.13238	2.08921	2.42461	6.97087	4.21944	3.87492	4.08822	5.49826	3.96022	2.24742	2.85882	2.70927	4.15513
NRAS	7.85036	6.16268	6.96463	3.51887	5.1824	7.06681	3.1515	4.4743	4.84988	6.45611	7.02626	6.23522	7.1864	5.67081	8.03529	3.9499	4.15537	7.00149	6.39681	4.71049	2.78215	6.28695	5.31952	4.56557	5.71814	4.06375	5.54358	5.77114	6.53116	9.43945	5.91393	8.21815	4.31304	6.46512	3.43757	6.71947	4.7506	6.03177	4.91832	6.71283	6.70617	6.99017	4.99816	6.56219	6.47767	4.16326	8.53579	3.74292	6.45967
KRAS	3.51404	2.2143	3.44942	1.40184	2.91563	2.67059	1.30901	1.59633	1.80429	2.11301	2.67562	4.70495	2.975	2.60564	2.73263	1.72762	1.66855	3.80176	2.57491	2.02843	1.06859	2.72079	2.37504	1.87326	2.40043	2.33256	3.5072	2.39899	2.32334	2.96589	2.62936	3.22049	1.78621	2.61596	1.09904	2.73435	1.7499	3.27963	2.13364	3.65688	3.38824	3.8217	1.86871	2.95557	4.0077	1.72172	2.27266	1.45211	3.13094
HRAS	4.04827	3.98051	4.51717	3.93596	3.92925	2.83583	4.08113	4.01267	3.32188	2.95431	3.28824	3.99548	3.18615	5.23861	4.98895	4.55338	3.22873	3.07961	4.21019	3.90118	10.0206	4.40503	4.37362	4.63635	3.70771	4.98774	4.10538	3.66458	4.39446	6.94279	3.40871	7.84781	2.95118	4.50329	4.78618	3.89902	6.77747	7.22254	4.10752	8.38276	3.18443	3.74423	3.43766	4.34692	4.11114	3.45634	4.66046	4.98884	6.48783
TF	1002.17	820.66	968.109	885.348	1627.94	697.335	1088.98	2017.8	1679.74	706.942	691.182	1389.96	1510.22	1499.62	1454.7	799.717	1090.26	457.839	1570.08	1272.78	566.773	1190.7	1411.62	1115.43	1619.4	850.457	634.457	1231.14	1192.72	713.683	1506.7	642.575	905.849	1183.59	901.053	750.381	649.525	966.528	721.374	264.095	1503.15	871.647	1284.89	1402.56	751.376	1531.85	547.294	821.911	1263.52
TFRC	2.12656	2.13485	7.09664	1.86682	1.40626	3.12575	3.17174	1.44291	5.49874	2.37532	2.92672	7.20648	5.45624	1.29879	5.45882	1.15532	2.20794	4.38277	2.35142	1.23875	1.36622	9.62792	3.32537	2.34559	9.05839	1.50567	3.03379	3.06864	4.11732	4.8816	3.59414	6.80961	3.62745	2.99533	4.91609	1.49904	3.76392	4.06604	4.96059	2.03046	6.29629	2.85171	1.33851	7.85042	8.62477	2.17436	5.14219	1.15266	3.58858
TFR2	157.08	208.327	220.077	184.523	192.038	277.182	192.315	170.956	218.667	223.784	173.144	161.547	230.71	146.763	118.217	203.881	246.147	172.433	164.24	143.102	137.544	204.18	230.526	174.454	185.121	251.602	195.879	265.762	157.969	160.87	173.621	162.627	237.907	139.867	156.05	161.252	216.568	94.327	209.764	178.737	162.263	151.784	172.119	170.035	149.98	166.631	123.039	192.718	135.409
SLC38A1	0.622266	0.763113	1.22092	0.266259	0.629194	1.05697	0.346917	0.397159	1.80491	1.71673	1.0296	1.07904	1.00713	1.29178	2.42022	0.970997	0.295836	5.76704	1.0155	0.593879	0.595934	2.06614	1.32876	0.600804	0.588605	0.218998	0.636131	2.54467	1.71971	2.73643	1.12794	2.54822	0.607887	1.75258	0.26558	1.10226	0.944369	1.55149	1.4494	3.2162	0.936651	1.97372	0.740117	1.12002	0.875871	0.997855	3.29772	0.507423	2.05547
SLC1A5	1.36617	6.09262	3.2565	1.38976	2.3339	1.68874	1.50617	1.70771	1.501	2.39611	3.4367	3.07859	1.71523	2.33418	3.0417	1.88441	1.39731	2.46905	1.73561	1.82458	2.49513	3.39719	1.29248	3.67337	2.24526	0.859866	1.72271	2.43213	2.08923	4.28153	1.73969	4.29688	1.26049	2.96607	0.922121	3.19544	3.89279	2.57809	3.42328	9.65058	1.57459	6.4845	1.69371	2.78502	3.46191	1.30502	7.79917	1.01853	3.94432
GLS2	6.39276	8.75501	1.8943	2.04609	7.34025	7.43106	7.80474	6.46133	11.2804	4.14295	5.68786	5.34446	8.15955	3.74717	6.78875	2.42232	7.7425	1.78293	12.6514	2.48666	0.37013	5.34949	2.26733	5.30677	2.56332	3.0729	2.91448	8.11783	5.40746	2.16297	6.98201	3.50929	6.64835	2.56226	0.719824	2.71313	6.80525	2.01777	3.99121	1.36956	3.5231	3.59998	5.46483	5.96958	3.65887	10.8875	2.14574	1.61787	1.69214
GOT1	150.401	297.967	156.203	158.157	218.47	234.526	149.352	78.8848	92.6871	108.162	132.46	257.159	138.411	104.496	177.419	161.584	95.8053	334.583	85.7105	116.22	175.158	131.809	79.4678	108.457	147.803	172.33	147.971	255.207	97.8924	158.455	117.573	307.459	124.997	88.5746	107.135	141.895	162.074	192.691	203.528	106.162	122.224	206.242	74.2691	122.432	316.981	119.377	124.227	111.236	137.177
CARS1	1.71423	2.61269	4.09018	2.78531	2.87779	1.70812	1.54155	2.20894	1.33256	1.58718	2.33044	2.92024	4.10208	2.43804	2.6197	3.04774	2.96995	2.39171	2.36713	3.34535	2.41322	4.4626	3.22379	2.14661	3.35218	2.8368	2.41116	2.13675	3.70416	3.66278	2.55943	4.92836	1.82926	2.81216	1.45977	2.33202	2.24421	2.67903	1.2789	4.7757	3.55576	2.71115	2.7246	2.1946	3.6972	1.87277	2.29293	2.47724	3.07726
ALOX5	1.02426	1.38944	0.941454	0.365139	0.327134	0.843844	0.447105	0.429509	0.87729	0.965687	1.00878	1.15643	0.942288	1.15444	2.16608	0.615854	0.539	1.53826	1.10744	0.393118	0.902765	1.33867	0.925733	1.26748	0.420039	0.270165	0.732806	1.37526	0.808734	1.92002	0.970339	1.26187	1.0795	1.6491	0.0122945	0.572063	1.44375	0.793471	0.757816	2.14425	0.562632	0.744429	0.752729	1.53218	0.815389	0.891713	4.93075	0.216857	1.37216
KEAP1	13.2056	13.1576	11.8861	11.1764	10.6047	10.5336	12.5635	11.4375	11.6983	9.87347	12.9532	11.0232	11.764	10.2438	13.7092	10.5257	11.3624	9.76672	16.7473	10.7238	17.1594	14.0133	12.3995	10.8263	10.9299	12.2306	13.1097	12.4567	11.5203	13.0653	11.9766	12.4195	13.841	13.206	10.7117	11.2949	13.3383	10.9595	8.41758	22.8171	10.1044	8.45807	10.9739	13.6554	10.2267	9.80507	11.7779	11.2444	16.7079
HMOX1	43.5783	85.5122	43.4941	18.6702	85.9338	35.8188	30.8448	16.2094	16.4879	35.2195	27.5227	86.1792	22.9653	27.7483	29.0452	34.0909	13.7398	106.382	16.1451	18.5308	35.5826	192.303	33.7482	83.7435	41.807	37.7026	31.0361	61.0042	16.4398	75.2796	11.7279	63.3112	20.4434	30.4222	12.9566	105.21	49.0128	65.0129	71.7846	79.1565	12.637	80.2203	9.92318	23.5779	127.433	14.8957	49.8431	14.4549	25.0071
ATG5	6.49116	4.9482	5.97875	4.3811	3.84237	4.61286	4.51961	4.32297	4.6017	4.86605	5.16209	4.96243	5.24139	5.0147	5.35171	4.30507	4.56205	4.31888	4.66991	4.93477	3.63647	4.10525	4.43625	4.54281	4.15169	4.32372	4.6807	4.53496	5.14937	6.53181	4.47428	6.38352	4.23038	5.04422	3.10324	5.01786	4.9707	4.87117	4.61007	5.60541	5.25135	4.7985	3.81412	5.8026	4.89314	4.2109	5.72277	3.92787	5.88967
ATG7	1.03683	1.04639	0.939551	0.749854	0.65566	1.15064	0.746473	0.802627	0.96579	1.09094	1.02401	0.938714	1.03991	1.09956	1.26017	0.916721	0.946374	1.03805	1.43197	0.71252	1.35399	1.10903	1.05855	0.973145	0.951168	0.858996	0.759341	1.28196	0.963239	1.68211	0.982771	0.929977	0.767752	1.24418	0.568492	0.823313	1.03578	0.868314	0.8885	1.12155	0.887378	0.95879	0.864585	1.34447	0.858707	0.810106	2.22269	0.700741	1.36359
NCOA4	76.3314	63.0714	57.3337	31.8643	54.4353	104.702	46.2834	45.6369	66.028	70.5312	85.6967	59.2828	71.8224	66.2235	92.2892	48.6102	65.3941	57.314	110.411	46.8661	24.9536	67.0421	74.9034	36.498	52.3913	55.6153	66.0107	72.7529	75.7932	51.7593	93.0122	40.119	43.642	70.4148	22.5694	59.6834	45.4932	52.4985	40.2783	63.2442	76.2689	49.1278	73.9192	100.575	47.3653	48.8315	51.6318	37.686	72.9182
ALOX12	0.0621459	0.100426	0.0724297	0.0657637	0.069618	0.0336086	0.0767361	0.183019	0.0873975	0.134853	0.200541	0.0524381	0.118549	0.0725133	0.175277	0.0951286	0.0866761	0.0645093	0.0980088	0.0503842	0.035509	0.218372	0.0444927	0.114291	0.104809	0.0981914	0.0642994	0.187746	0.088702	0.146008	0.0702583	0.164188	0.220938	0.114848	0.0350599	0.133171	0.206594	0.0896813	0.0572043	0.222353	0.115984	0.0597058	0.193189	0.192546	0.056713	0.0933167	0.174825	0.0873834	0.0740621
ALOX12B	0	0.00899211	0.00475593	0	0	0	0.00581388	0	0	0	0.0204332	0	0.139004	0.00714213	0.011906	0	0	0.00529482	0	0	0.0174871	0	0	0.0140712	0	0.00743944	0	0	0.014561	0.00719044	0	0.0202144	0	0	0.00863297	0.0163957	0.00726722	0	0	0.00684388	0.00475989	0	0	0.00729407	0.0139647	0.126378	0.00614972	0.00662057	0
ALOX15	0	0.00701617	0.0074217	0.00842332	0.0053502	0.0206628	0.00907266	0.00540968	0.0251871	0.0327269	0.0212576	0.00895536	0.0173535	0.0222908	0.0836077	0.0168708	0.00444075	0.00413133	0.0251068	0.00968015	0.0272889	0.0621558	0.0227953	0.0109791	0.0632865	0	0	0.0160315	0.00757424	0.0056104	0.0249203	0.010515	0.0339585	0.0325173	0	0.0255857	0.0113406	0.0159048	0.0293079	0.01602	0.0371394	0.0152948	0.00824817	0.0512214	0.0108961	0.0224108	0.124758	0.0103315	0.0521742
ALOX15B	0.00894835	0.102536	0.104291	0	0	0.0174214	0.00509963	0.0121629	0.0991014	0.00613179	0.101563	0.0604043	0.0585249	0.0939704	0.0417732	0.0442535	0.00499218	0.0371546	0	0.0272054	0.0690244	0.00698739	0.0256259	0.0370274	0.213435	0.013051	0.0347191	0.072089	0.0340591	0.555022	0.0233457	0.070924	0.0445378	0.135776	0.00757238	0.0071907	0.0446209	0.0178797	0.148263	0.0480247	0.0292259	0.0687761	0.0185448	0.0447858	0.0428719	0.0503873	4.15893	0.00580721	0.15463
ALOXE3	0	0	0.00671901	0	0.00968728	0	0	0	0	0	0	0.0243224	0.0353484	0	0	0	0	0.00374017	0	0	0	0.0112542	0	0.0298189	0	0	0.00559199	0.00725683	0.00342855	0.106663	0	0.0142791	0	0	0	0.0057908	0	0.0239982	0	0	0.0033623	0.0323089	0	0.00515241	0.0147966	0.0730402	0	0	0
PHKG2	1.76452	3.91531	1.82015	2.65957	1.57164	1.97173	1.77469	1.24333	1.83257	1.50337	2.28627	1.3336	1.76608	2.0993	1.93297	1.50919	1.90841	1.90092	1.62755	1.66753	3.90604	1.45955	1.91172	2.23969	1.59095	2.3472	1.70526	1.77689	1.81293	2.11096	1.33869	2.52396	1.18278	1.99844	1.39242	1.23815	3.99196	2.32162	1.67403	3.74973	1.49842	1.56234	1.5592	2.04592	1.98319	1.59705	2.81037	1.89682	2.12651
ACO1	22.1678	23.6017	20.0687	20.5265	25.2751	32.8382	20.6127	25.4806	23.4476	18.916	21.4472	23.8244	25.2333	20.5614	19.4129	16.7864	22.4294	23.4092	16.6666	16.9467	15.5628	22.6841	20.4541	20.5366	19.0788	18.5221	21.7022	24.837	23.4638	18.0715	26.9046	21.7269	20.574	21.3404	14.5102	16.9432	20.6916	23.4618	26.8305	14.7897	19.8495	21.1056	23.1192	16.9242	21.6012	28.9575	17.3887	14.349	7.82594
ULK1	3.62913	2.82842	3.79882	3.87621	4.62005	5.52621	2.9836	6.35119	3.71136	5.31046	3.36219	6.34283	6.20566	7.28809	4.71757	4.38563	4.61954	3.04995	3.50856	4.54985	3.54692	5.27833	6.43057	4.6004	3.69651	5.30858	4.78665	4.40774	7.52165	3.83061	3.0365	4.30946	4.54042	4.07165	2.75765	1.61126	4.95482	4.21989	4.29235	4.57779	2.9379	6.9345	5.25517	4.22958	4.9288	5.13389	4.3668	3.04165	3.84964
ATG3	4.23882	3.51348	4.35941	3.27738	2.51828	3.38962	3.15353	2.67585	3.16843	3.21452	3.27997	3.21751	3.63214	3.38974	4.29237	3.39565	3.1514	3.72575	4.1909	3.07081	3.38976	3.24067	2.86966	3.2138	2.86826	2.51233	2.76629	3.03174	3.59253	4.45022	3.36391	3.78957	2.46536	3.99522	1.65468	2.77557	4.45984	3.60283	3.45281	5.41959	3.2397	3.03299	2.55912	4.01347	3.11665	3.34307	4.66943	2.60987	4.57338
ATG4D	1.74849	2.27508	1.87424	2.31599	2.79817	1.73679	2.18949	2.46551	1.53057	1.46711	1.9059	2.97748	2.55422	2.04018	3.97014	1.68907	1.64567	1.66065	3.0889	1.93108	2.12044	1.89473	2.6569	2.09998	2.97461	2.17715	2.03983	2.02427	2.08254	4.36785	1.86812	2.67897	2.8924	2.99872	1.50982	1.70135	3.44008	3.00249	1.81748	3.59078	1.49287	2.65117	2.45271	2.72992	5.24279	2.36428	3.11902	2.28487	3.79187
BECN1	3.2317	2.68843	3.22391	2.63529	2.52141	4.07936	2.52305	2.75328	2.65783	3.73426	3.33656	3.27701	3.76217	3.00483	4.15616	3.3188	2.87054	3.61552	4.1084	2.11404	1.30343	2.80059	3.07284	2.39481	3.21214	2.88039	2.51104	4.07116	3.9876	4.72235	3.52241	2.84882	2.49007	3.72513	1.15111	2.17259	2.76857	3.32852	2.38497	4.98219	3.0157	3.00335	3.2174	3.36778	2.80172	2.98057	3.97264	1.79571	4.10813
MAP1LC3A	11.0874	12.8226	8.3662	7.96562	12.7443	8.57246	8.10644	12.7083	10.1859	4.51005	9.51737	9.99987	10.7364	21.4456	11.6295	10.1363	12.0021	7.91744	14.5996	16.7374	11.8223	9.9425	16.8226	15.5049	14.905	9.36372	7.41038	5.04831	18.1664	12.7355	16.9305	13.6509	8.57229	14.2512	19.9882	9.21849	17.6914	25.1239	7.08692	14.9277	11.2719	15.7786	13.8631	13.7327	11.9565	11.7504	13.7195	5.79821	6.10269
GABARAPL2	13.8693	13.9882	12.3986	10.0318	7.99555	10.351	11.5787	9.35902	9.22176	11.8171	12.5153	9.42956	10.723	10.6227	12.1789	11.4832	10.1888	10.4476	10.7698	11.7349	13.0351	10.2651	9.57791	10.2979	8.9401	10.4657	9.99319	10.8909	11.9226	16.0135	9.31048	14.7407	10.1218	12.6908	8.23757	10.8795	13.7224	11.4799	11.3608	16.0265	10.7672	10.542	10.818	11.6085	11.7664	10.7063	15.1277	9.46442	14.2936
GABARAPL1	33.5678	32.5221	27.5141	18.6522	48.0396	34.9787	36.6541	22.5608	25.7288	18.8443	23.3455	38.3214	28.5959	34.3085	42.492	28.9953	24.3948	18.3274	41.0307	25.6973	19.1137	20.7332	18.943	24.6364	34.6871	25.7991	22.2146	34.4376	38.8791	28.4504	25.6362	28.9427	23.2877	26.5635	16.2457	22.7219	38.9578	34.437	37.1979	21.8876	27.67	51.0059	26.8056	32.6156	43.0768	41.5561	23.8249	14.533	29.8056
ATG16L1	2.88118	2.65411	2.50253	1.86585	2.44555	2.23326	2.54084	2.40269	1.81248	2.35197	2.95271	2.876	2.73279	2.05474	2.95462	1.94372	2.15733	2.69307	3.14229	2.09249	1.35182	2.96357	1.9633	1.88503	2.17963	2.2481	2.32269	2.26064	2.44951	3.71092	2.11125	2.84118	2.27481	3.21379	1.29301	2.03439	2.91106	3.0023	2.15851	3.78457	2.88303	3.04787	2.73014	2.66872	3.18951	2.28594	3.1414	2.17513	3.47635
WIPI1	2.46903	1.4883	2.37634	1.71937	1.42399	3.36484	0.748935	2.97708	1.54992	3.18729	2.52582	2.55826	2.06628	2.54822	4.90787	3.51683	2.06616	3.91467	2.87224	2.06793	1.69973	2.46903	3.06777	1.62038	2.53871	1.23132	1.78615	2.75102	4.86931	4.89515	2.33558	1.79912	1.87448	3.52788	0.485273	1.53604	3.42688	3.88305	2.56595	2.08382	2.1888	2.87711	2.76476	2.6366	2.56754	3.18869	4.97883	1.64884	3.92011
WIPI2	4.79312	3.76191	3.90758	5.33566	4.05141	4.18984	4.89723	4.46569	3.84735	4.30825	5.14675	4.50622	5.59488	5.16658	6.23322	4.45037	4.21142	3.20675	6.22627	4.1992	5.89044	4.44746	4.53366	4.29642	5.50856	4.61347	4.22532	4.21884	5.62498	5.93762	4.372	4.31613	4.37595	5.34606	4.07908	3.52178	6.19883	5.22884	3.56367	7.62772	4.09814	4.05202	4.39745	4.93552	3.56153	4.628	5.6077	4.42299	6.3147
SNX4	15.5932	9.23055	13.4151	13.3521	12.175	13.631	10.9386	12.827	14.4952	15.3732	13.9499	14.6512	17.2536	14.8031	15.7878	12.3026	13.9055	13.5854	16.3209	13.1671	5.95788	12.715	11.6722	13.7959	13.4394	12.0349	12.7366	12.0162	14.7425	13.9797	15.9752	15.6371	13.1852	13.5538	9.64057	13.4627	11.8846	13.53	12.7728	15.386	17.2484	14.6382	12.7791	13.9523	16.3887	15.1728	11.2388	10.3467	14.3814
ATG13	4.99649	4.6463	4.87155	4.50921	4.62521	5.82199	3.70547	4.65822	5.16389	7.36742	5.05419	5.35789	4.90643	5.8526	7.20208	5.28266	5.37632	6.43392	6.11588	4.47131	6.00059	6.37364	5.43643	3.83285	4.66599	5.92125	5.57707	6.72691	5.45411	5.69034	5.45048	4.79046	4.7332	5.46138	5.26968	4.06483	7.16819	5.39259	4.30825	7.92679	3.68921	4.82386	6.01559	5.09162	5.61308	4.01863	7.61039	4.46827	6.78247
ULK2	0.355109	0.410062	0.458146	0.345195	0.173924	0.309056	0.52241	0.407841	0.294703	0.988433	0.722284	0.357707	0.727662	0.439403	0.833687	0.451197	0.58819	0.621499	0.547009	0.557389	0.38457	0.6857	0.398106	0.347417	0.425789	0.417546	0.508398	0.573822	0.775341	0.933257	0.337546	0.390912	0.504985	0.660268	0.237608	0.409233	0.466709	0.498698	0.454411	1.08772	0.362198	0.424914	0.55623	0.360182	0.305223	0.382866	0.640535	0.375159	0.752901
SAT1	143.798	181.752	87.1883	94.3637	117.234	81.986	127.706	98.7147	92.0636	97.8004	102.089	178.236	101.542	126.203	134.135	88.204	77.7238	92.6933	96.3776	100.733	157.187	101.58	82.7516	151.512	138.337	102.632	99.894	95.1066	116.239	173.891	85.9891	181.344	95.2029	123.748	84.7039	106.095	177.935	185.047	115.207	77.7886	131.048	152.321	82.3983	143.972	214.019	123.756	205.374	95.6644	180.658
EGFR	7.96709	6.08639	8.62615	7.2772	11.1259	12.6633	9.39296	7.334	6.75832	8.82154	9.25236	14.3542	9.98686	6.68564	9.85071	5.85317	6.44726	14.8236	8.40064	5.18383	3.03164	7.45527	7.13629	4.517	9.60252	5.74892	8.3578	10.5892	7.40002	5.55061	11.6227	6.35028	9.86701	7.71908	2.77924	6.86079	8.95019	8.52971	7.65493	4.23825	5.70126	11.4201	6.56807	8.07148	9.02718	8.05654	5.10135	4.43235	4.87443
MAPK3	2.73245	5.09687	3.32233	3.30962	2.16917	3.8149	2.99238	3.43799	2.83141	4.18506	4.52131	2.78752	3.43334	3.645	4.61966	3.2609	3.11473	3.05485	4.38693	2.71226	5.78514	2.84296	3.59531	3.37162	3.30408	2.13263	3.35245	4.05306	2.96195	4.70028	4.10773	4.07293	2.86703	4.77958	2.09981	3.07997	4.57686	3.95462	2.96383	7.08961	3.80405	3.10763	3.4589	3.79646	2.43629	3.10219	6.76228	2.61199	4.24211
MAPK1	4.70397	3.72488	5.37651	3.79912	3.56819	5.67417	3.148	3.54289	3.99969	5.58028	6.34178	5.34735	5.77372	4.2688	5.58606	3.3537	4.20979	5.39397	5.23216	3.8166	2.05474	5.61048	4.65804	3.21607	4.82697	3.15316	4.42924	4.80436	5.11515	6.16602	5.19953	4.7504	4.08055	5.33414	2.74681	4.62896	4.14606	4.03247	3.66841	6.78925	4.79327	4.43048	4.73065	3.99732	3.63181	3.26384	5.30382	3.48706	5.25129
BID	6.00906	4.95818	4.43787	6.28149	4.17411	3.97875	4.69571	5.47135	5.41882	3.5163	4.85009	6.07144	6.99859	6.98876	6.30881	5.128	5.30057	4.51371	7.657	6.0922	5.8919	5.70585	5.69834	4.56865	6.07439	3.8665	4.83321	4.67035	8.48405	6.51628	6.86555	6.41633	4.13829	5.86486	4.92518	3.86887	6.64664	5.8613	3.52294	8.48358	4.45579	4.05172	4.47738	7.22459	3.97098	5.59365	6.95447	4.42176	9.38374
ZEB1	1.58815	1.0133	1.61219	1.00936	1.34748	1.27255	1.22819	1.08146	0.81607	1.86744	2.17291	1.6264	1.59458	1.2215	1.4623	0.964885	1.18484	2.37202	1.30748	1.07044	0.48325	2.04974	1.56087	1.19464	1.59391	0.895443	1.6845	1.49204	1.32043	1.74199	1.45631	1.14413	1.49672	1.77322	0.500996	1.4222	1.17596	1.09323	0.976498	1.29028	2.02715	1.58498	1.2594	1.59688	2.32189	0.963061	2.12243	0.882261	0.978066
DPP4	10.2508	8.38219	11.4036	7.02657	7.73713	9.69245	8.80135	6.83791	14.7145	6.3237	12.4092	10.6594	7.96323	14.1523	24.5169	6.25227	11.5885	6.52195	11.0846	9.1703	4.4276	7.66649	8.40395	5.34966	9.89967	7.11629	9.24737	4.61389	11.8413	6.95818	13.918	7.71739	10.6848	15.7969	5.31916	7.98083	15.8568	12.8982	4.34854	8.35018	8.339	7.18224	12.5053	15.4319	7.29736	10.8163	6.9065	2.89267	12.3421
CDKN2A	0.118923	0.104823	0.119635	0.0231821	0.0336559	0.10561	0.0285362	0.0510452	0.0297079	0.04289	0.0877556	0.0492927	0.037525	0.148986	0.66108	0.0309539	0.0349187	0.126694	0.401423	0.060894	0.187757	0.234598	0.116509	0.0561156	0.0226199	0.0273862	0.0242849	0.535755	0.390106	0.529392	0.127371	0.582907	0.0712064	0.361621	0.0476698	0.0502967	0.249688	0.212608	0.0614548	0.0503877	0.0379648	0.0481067	0.233487	0.264036	0.124234	0.1586	0.215065	0.0162478	0.734736
PEBP1	784.601	782.197	782.841	811.671	643.234	567.697	915.11	805.337	785.914	588.013	913.077	670.443	681.069	830.235	624.682	633.519	943.895	482.615	667.657	887.499	756.23	829.815	713.2	845.89	687.31	837.554	913.587	551.447	942.452	590.97	787.78	644.525	816.328	747.346	1067.04	687.551	828.663	907.38	662.068	727.482	757.627	659.481	649.567	721.429	627.743	774.007	645.986	719.817	702.694
SOCS1	1.92434	6.90172	4.11434	0.877745	1.4867	1.72252	0.592456	1.35291	0.361611	3.89529	1.66873	5.16362	0.54249	0.78975	1.74245	2.56279	0.308496	12.6395	2.7674	0.537979	6.91946	3.09163	0.316715	3.31018	2.7498	2.72595	5.44099	1.2028	0.420942	6.29838	0.415488	18.9484	1.24245	1.29083	1.32896	13.384	1.4496	16.7649	3.08115	3.24966	0.443769	5.29843	0.756354	1.96103	15.6536	0.236644	4.02674	3.80394	6.51094
CDO1	108.519	71.3437	98.0878	88.7238	138.533	117.963	130.877	98.4409	83.067	89.8582	93.0872	129.93	130.414	105.264	109.378	142.675	112.057	58.6677	79.0347	85.2758	67.9606	77.1792	98.4739	85.4423	91.9094	131.355	122.169	130.906	54.7573	63.4965	81.1345	90.5617	110.041	73.9491	93.2669	80.2006	95.1949	67.6687	132.487	68.1588	117.529	89.9358	74.1873	103.591	115.49	80.6496	61.1859	98.9826	101.756
MYB	0.00986551	0.00869581	0.00919843	0.0156597	0.00331551	0.00640234	0.0140558	0.0234666	0.0026014	0.0236609	0.105386	0.072145	0.0268847	0.0379873	0.0460547	0.00696989	0.0137596	0.0256017	0.0207449	0.00899815	0.0126832	0.0269625	0.0211893	0.0204113	0.249572	0.00359715	0.015311	0.0248368	0.0211218	0.0312908	0.0308862	0.0195483	0.0175367	0.0403018	0.00417425	0.118915	0.0210833	0.144557	0.58724	0.0231643	0.0506335	0.120057	0.0357796	0.024688	0.0101284	0.0277759	0.077312	0.0128048	0.0411501
MAPK8	2.40594	1.75855	2.06353	1.90875	1.83842	1.95764	1.84742	1.68674	1.62053	2.01116	2.14738	2.33007	2.0582	1.87548	2.40394	1.64013	1.69075	2.43755	2.0414	1.69735	1.08288	2.25883	1.76078	1.75435	2.17829	1.69294	2.05477	1.89858	2.0564	2.1222	2.25969	2.08535	1.92678	2.11186	1.11919	2.51675	1.89229	1.99602	1.78206	1.90476	2.55498	2.30516	1.60955	2.09444	2.2919	1.86973	1.9711	1.28563	1.86624
MAPK9	2.19972	1.68555	2.25975	1.74183	1.34633	1.94396	1.74506	1.73761	1.41858	2.02569	2.35344	1.78887	2.0416	2.06959	2.47717	1.6118	1.63908	1.83267	2.5927	1.67608	1.33295	1.63025	2.01895	1.68815	1.99889	1.31286	1.85958	2.02929	2.19678	2.14757	2.39188	1.8566	1.86742	2.31143	1.3545	1.76035	1.90323	1.84396	1.65438	2.67535	2.15434	1.5465	1.95957	2.28236	1.64639	1.60325	2.32921	1.42952	2.38713
CHAC1	0.434478	0.893584	5.49953	1.20516	0.769898	0.66645	4.83209	0.36686	0.43049	0.171416	0.650473	0.207374	2.24602	0.470089	6.10012	1.36734	5.50152	0.287001	0.456803	2.39369	0.868883	3.00198	3.60075	0.980633	0.171291	0.854501	0.939933	0.861792	1.80404	0.89086	8.44304	4.06106	0.19659	0.568581	13.2918	4.5282	0.750311	1.1312	0.468604	3.26804	10.6335	0.548125	3.91547	1.54382	2.67634	0.785847	0.682553	1.82849	1.63182
MAPK14	7.25578	4.87409	7.5459	5.61756	6.39281	7.2643	5.69046	6.02097	5.94076	7.61358	7.1385	6.53452	7.36668	5.79869	5.90498	6.49627	6.48944	8.81092	5.6519	4.59924	4.16048	7.12149	6.61708	4.29844	5.8182	6.40876	5.97062	7.81579	6.09427	6.62856	6.64657	5.71592	7.56308	6.47261	3.48283	6.67168	5.32064	4.87995	5.70324	9.83856	6.14237	8.19405	5.97962	5.82039	8.48589	4.95528	6.89775	4.3858	5.40617
LINC00472	0.0550884	0.0485569	0.0330194	0.0333116	0.0158688	0.0255359	0.0448495	0.026742	0.0207515	0.053927	0.0157626	0.0531235	0.0471815	0.0330575	0.0826607	0.0277996	0.0175618	0.0326762	0.0413707	0.019141	0.0269798	0.0122903	0.0676112	0.0162822	0.00568815	0.00573893	0.0916028	0.0396249	0.0561633	0.0221874	0.0287444	0.0363856	0.0391695	0.0413344	0.0199789	0.0189719	0.0560608	0.0104831	0.014488	0.0422361	0.0550781	0.0907293	0.0407737	0.0337608	0.032318	0.0443139	0.128088	0.0663941	0.0187575
PRKAA2	0.301256	0.0817038	0.279535	0.0505777	0.0934552	0.445522	0.0924453	0.0964629	0.146653	0.44264	0.160518	0.110804	0.476788	0.27783	0.818109	0.102324	0.0888815	0.502144	0.246688	0.153237	0.143995	0.285	0.236419	0.0839035	0.291022	0.0971692	0.179824	0.280033	0.745587	0.888128	0.226718	0.428567	0.0844448	1.14952	0.17404	0.235099	0.134126	0.387788	0.152871	0.328413	0.174348	0.306125	0.282149	0.285812	0.182398	0.244665	0.235733	0.206785	0.388363
PRKAA1	9.6195	6.64126	10.7398	7.22832	6.80421	9.1738	5.07507	5.07572	5.77414	9.16047	9.21185	3.93185	8.92413	6.52356	7.47313	7.37361	4.95662	16.313	6.39816	6.39394	3.92768	8.14333	8.82005	6.79923	8.6239	6.96071	9.45733	8.78895	7.85895	6.66372	5.75176	9.87129	6.95423	6.61132	4.30773	11.3561	5.86728	7.58932	8.33015	8.89895	9.45618	9.96634	5.74113	7.63351	12.6705	6.60459	6.82165	6.42764	7.27448
ELAVL1	3.51403	4.61904	4.10447	3.42022	3.58414	4.1402	3.35812	3.96814	3.05293	4.10615	4.60002	3.51108	5.9297	3.44851	5.02787	3.43123	4.05998	4.37043	4.76344	4.65134	3.00191	5.42201	4.02093	3.51612	3.54642	3.64242	4.48025	3.48459	4.35857	5.42678	4.55191	5.57951	3.54329	4.31194	3.73009	4.14321	4.49818	4.57617	3.48885	6.53952	5.00106	3.98787	4.82191	4.84121	4.07767	3.48435	4.90032	3.70705	5.21193
BAP1	6.79132	6.68537	6.09222	9.05	5.24205	6.33442	7.07782	6.18555	6.9398	10.6701	8.61386	6.96821	7.2685	7.07744	8.79544	7.17618	8.18763	5.90898	8.17724	3.60475	9.78989	8.25385	6.70036	6.16969	5.69514	8.47825	6.5511	9.34352	8.31626	7.45023	6.34328	6.09649	9.00975	8.61487	5.25261	4.20393	9.77497	5.12303	5.66745	12.9381	3.72641	4.98148	8.90348	6.62631	5.66443	6.91181	9.04409	6.63366	9.27531
ABCC1	0.465007	0.78822	0.500267	0.263072	0.348614	0.856568	0.330238	0.359783	0.413122	0.887297	0.933764	0.824981	0.670643	0.643585	1.12087	0.376538	0.357204	0.85028	0.729591	0.419775	0.649934	0.701071	0.583885	0.631517	0.346442	0.127815	0.333083	1.10223	0.719874	1.54295	0.574858	1.44589	0.539188	1.31303	0.0484312	0.643861	0.868897	0.840985	0.68046	1.19742	0.664241	1.15697	0.626399	0.892567	0.577776	0.4693	2.52282	0.269277	0.671399
ACVR1B	5.2096	4.51637	3.89386	4.49244	9.04523	5.80983	3.30001	3.98712	4.62085	5.7757	5.70047	10.5623	5.37766	3.59387	8.14733	4.9085	4.01154	11.4506	8.86179	3.43411	2.32637	7.19143	6.27989	6.32188	5.08366	4.92069	9.11245	6.90054	5.00701	5.8871	4.76572	5.72122	5.93887	5.49971	2.65559	8.75911	5.04763	4.76697	4.76028	4.24564	3.33942	11.1935	5.6795	6.11834	12.4894	5.18051	4.13939	4.24308	7.99616
TGFBR1	3.56709	2.18451	2.75743	2.16597	1.70572	3.28351	1.65608	2.4942	2.76436	3.10355	3.71372	2.80833	2.81373	2.60262	3.72408	1.63626	1.69186	3.53425	4.18328	2.36157	1.25887	2.2413	2.63601	2.32899	2.46664	1.28475	2.384	2.73096	3.2737	4.16335	2.88588	2.13377	2.19288	3.32705	1.12569	3.40409	2.76666	2.73705	2.22298	2.77282	2.74495	2.64476	2.9086	2.14564	2.20569	2.60159	4.2457	1.53387	2.52422
EPAS1	31.1774	42.6932	28.6835	21.5146	41.1306	29.4295	17.6579	16.8182	18.3129	40.221	45.9588	44.9412	29.0502	23.7573	22.7597	23.2482	23.5295	57.4308	26.2602	19.6412	12.5624	49.7247	30.2963	26.2307	34.5421	28.3236	33.3097	32.4797	27.1598	29.7531	26.1968	39.0233	29.6981	24.0222	12.3344	38.2958	24.7417	24.381	20.5576	37.6044	35.1445	50.0433	25.366	25.2922	56.0748	17.4909	35.7765	20.0574	25.4035
HILPDA	1.3875	6.65726	1.82458	0.588697	2.56025	0.569145	0.477424	0.462588	0.33135	0.995625	1.08366	2.06172	0.527931	0.540676	0.38955	0.841543	0.48197	3.23382	0.60554	0.509391	1.35747	0.827915	0.843426	1.24577	1.53269	0.744547	1.26968	0.632711	0.46085	5.43411	0.539571	14.3172	0.958635	1.00071	0.664613	2.6086	1.23084	2.07493	2.82746	1.51039	0.787851	11.8296	0.474728	1.31025	12.7128	0.405387	0.891644	0.900448	0.577184
HIF1A	11.6778	10.7801	9.07347	3.96334	7.21624	14.0986	4.72753	3.78587	4.27214	7.97688	10.111	12.8482	7.30506	7.59	10.3597	8.84486	4.53402	33.7502	6.97403	4.93213	4.61662	10.3797	7.2609	8.79728	7.77517	5.87672	11.311	8.18941	8.00861	16.0242	6.75754	17.1425	5.25498	9.62392	2.03429	11.7723	6.52759	12.1922	9.35471	13.8897	9.35837	15.4914	5.42894	12.3963	21.0798	4.65035	12.1289	3.28403	9.19961
IFNG	0.066738	0.117651	0.103709	0.0117705	0	0.0144368	0.0887452	0.151187	0.0703915	0.0609756	0.0742619	0.0375419	0.0484985	0.171317	0.467324	0.0942995	0	0.11546	0.116945	0.0676339	0.0571992	0	0.0955606	0.15342	0.0321581	0.0162226	0.155364	0.0448041	0.0635042	0.721264	0.0464307	0.293867	0.12654	0.389475	0	0.160887	0.427871	0.0888996	0.0273028	0.0895436	0.207591	0.0142483	0.0691546	0.190868	0.137033	0.100212	0.777793	0.0433109	0.185581
ANO6	12.0754	5.90188	8.63284	8.46088	8.61839	14.2295	8.58433	8.81484	9.60267	12.4592	10.4521	10.2817	13.5322	9.26706	12.9542	7.54786	12.629	10.2309	13.6749	8.75499	5.24806	9.8197	11.4579	6.16984	9.27252	7.69011	13.0675	12.3258	9.12179	10.2991	14.2549	5.84814	10.2961	11.3521	6.85786	7.76281	6.60033	7.16386	7.82607	7.59542	11.1071	8.43384	11.3705	10.6381	6.39565	9.18957	6.97775	7.23868	7.98161
LPIN1	1.93948	0.839662	3.0501	1.83482	2.41681	1.57146	1.47243	2.35208	1.44087	2.07884	1.99799	3.33857	2.18884	2.15268	1.71828	1.74466	1.23367	1.47851	1.37624	2.71561	1.07098	2.51696	1.53738	1.93309	2.02266	1.37103	2.26018	2.0267	2.03679	1.47005	1.1753	2.0792	2.52578	2.49169	1.05937	2.62691	1.64523	1.95666	1.33456	2.47504	1.39629	2.14352	1.81324	1.39977	3.1005	1.79573	2.13724	1.32834	1.69337
HMGB1	12.5426	13.9099	13.0292	10.8466	8.89027	9.09824	10.2951	10.1527	10.5982	12.8861	15.3098	10.7837	11.7465	12.0552	12.0032	8.76211	11.6147	9.23575	7.94917	12.6314	10.1064	10.3118	11.1927	12.7198	11.4975	9.62756	9.69484	9.3025	11.1604	13.0369	12.1372	14.3441	11.2057	12.0658	8.36352	12.2357	12.7962	12.3894	11.1502	16.3038	14.641	10.8289	8.82693	11.7397	10.861	10.5693	15.5342	10.6125	10.2104
TNFAIP3	1.93119	6.98855	13.1019	1.0956	3.27031	4.44909	1.29012	2.24941	1.62104	6.14981	5.22542	7.11254	3.54942	2.31344	10.9842	2.59608	1.8136	7.58975	7.99195	2.16913	2.43217	5.26118	2.46565	4.16941	3.62529	2.53493	2.26868	3.28984	4.49704	36.2144	2.86626	7.13238	2.39535	10.4938	0.472111	2.66833	2.98831	6.62412	3.1701	4.43008	5.94444	8.81296	3.31852	16.3775	4.75837	2.04498	17.7791	1.33335	11.3252
TLR4	3.94371	3.58973	2.26631	1.1347	1.22661	4.72721	1.52184	0.980989	1.74541	2.81897	3.9099	4.0338	3.52618	2.68518	4.38296	1.83925	1.70835	4.03215	2.63957	1.30087	1.39178	2.40723	2.98216	2.72689	2.09406	0.706758	1.56814	3.05251	3.60301	2.67791	2.34829	1.39263	2.23228	3.0055	0.209399	2.19143	2.14097	1.95368	2.19547	4.41638	2.43657	3.28203	1.86431	3.05192	4.06469	1.42819	5.51602	0.51187	1.91682
ATF3	10.845	24.758	68.8586	16.0043	30.8208	20.918	27.5924	12.9039	9.91421	33.3931	19.0753	27.3677	24.4254	2.43692	21.7403	7.20698	19.408	11.5324	2.63019	19.522	17.3597	30.417	7.4138	18.4367	9.40434	9.06279	11.9754	2.43815	21.6377	70.4256	14.0927	46.1721	3.65287	34.9719	11.3624	19.8224	10.358	40.9935	12.7627	30.879	27.3436	38.7469	9.95196	33.5624	26.3166	3.42156	29.4814	5.00541	11.206
ATM	0.666554	0.565051	0.931659	0.586513	0.334586	0.902169	0.567378	0.687338	0.56346	1.27624	1.09999	0.723957	1.09781	0.823652	1.29652	0.487212	0.562874	1.2143	0.813137	0.54557	0.297609	0.789733	0.940516	0.497369	0.642367	0.502899	0.662329	1.04291	0.970447	0.990105	0.896423	0.73857	1.03593	1.45324	0.17569	0.574654	0.759373	0.643685	0.69141	1.01813	0.922806	0.607333	0.70453	0.601583	0.608283	0.706906	1.97904	0.526337	0.716953
YY1AP1	3.85223	4.28376	3.57912	3.32827	4.23892	3.59697	3.30386	3.1409	2.7116	4.02454	4.26481	4.43454	4.19026	3.65279	3.9267	3.00865	3.18588	3.74283	3.87927	3.14621	2.42863	4.34495	4.22809	3.85612	3.81034	3.18849	3.79231	4.12477	3.24539	5.01027	3.50556	5.92256	3.96025	4.13262	1.95776	3.95762	4.3343	3.31991	2.30742	6.00096	4.05988	3.45979	3.16643	4.64086	6.34117	3.40169	4.92198	2.81291	4.38425
EGLN2	1.273	1.53604	1.4366	1.37981	1.24054	1.16835	1.44861	1.35792	1.36877	1.19697	1.67232	1.29778	1.15637	1.46518	1.89676	1.39707	1.4089	1.2145	1.19981	1.82116	4.65375	1.69211	1.12671	1.4689	1.11664	1.6884	1.61123	1.3815	1.38381	2.09359	1.11996	2.21767	1.30645	1.80559	1.71873	1.17193	2.4417	2.09634	1.02894	3.03186	1.11872	1.351	1.34471	1.86455	1.1589	1.67025	2.28974	1.79933	1.95897
MIOX	0.0150867	0	0.105499	0.0478947	0	0.00979066	0	0.0307593	0.0238689	0.020676	0.020145	0	0.0246678	0.0633724	0	0.0532929	0	0.0234906	0	0.018347	0.0129303	0	0.0432044	0.0624271	0	0.0110017	0.0702424	0.0303849	0.0287113	0.0319006	0.00787201	0.0697525	0.0321811	0.0088044	0	0.0484931	0.0214941	0.0100482	0	0.0809681	0	0.06764	0	0.0107868	0.0206516	0.0169903	0.0272834	0	0.0719178
TAZ	1.29136	1.83132	1.72847	1.46068	1.28846	1.12857	1.47842	1.27158	0.874743	1.48269	1.68985	1.53357	1.35447	1.73582	2.12333	1.41108	1.45047	1.46856	1.27324	1.7205	2.48412	1.4655	1.7258	1.95929	1.63859	1.76204	1.54543	1.67609	1.58104	2.46763	1.48239	2.69528	1.71396	2.02976	1.31135	1.1115	2.90282	2.03364	1.24327	2.98785	1.40053	1.42262	1.40949	2.34725	2.50621	1.48016	3.183	1.4191	2.15456
MTDH	15.4027	9.94785	16.0511	11.6715	11.2162	15.1766	11.9962	13.6632	12.7847	15.0024	13.3858	15.8979	15.3616	12.7868	16.1204	11.9541	12.4389	16.7586	18.2	10.964	8.01227	14.1758	14.1446	9.49091	15.1961	10.5118	12.8866	16.1596	15.9775	13.9043	15.1801	10.7502	13.279	13.0366	7.72437	15.1879	12.0443	11.1228	12.2279	17.7649	15.8904	15.975	12.5952	13.5196	14.0706	10.9625	11.994	9.67944	12.5658
IDH1	80.6785	33.0498	39.0591	49.7298	39.6299	52.0183	61.4494	59.4407	52.4694	52.4527	68.1534	42.5782	55.0265	42.612	70.3681	46.6669	80.3941	21.7454	57.4223	45.8323	38.0784	65.2348	56.0967	66.3903	59.8896	58.139	103.535	56.4324	52.4829	44.2231	55.8817	36.1683	68.9952	68.007	50.2586	52.9554	54.1397	55.8677	46.6031	40.7633	73.9978	41.2192	54.6608	74.9972	33.5156	52.9335	49.0874	44.0853	56.5077
SIRT1	3.53654	3.07	4.49647	4.41656	3.73766	3.42716	4.82149	2.8243	2.87611	4.30417	5.95851	2.24729	4.96154	3.29288	3.29703	2.77615	3.87291	3.91515	2.30357	3.00478	0.887888	3.65415	3.06902	2.15156	2.51313	3.72085	2.49945	2.36824	3.98269	3.06757	4.30264	3.47627	4.08091	3.68303	1.71805	3.07153	2.81616	2.11357	2.55749	5.21236	5.87806	3.41294	2.73303	3.79288	3.17847	2.63843	4.60472	3.11037	2.2244
FBXW7	0.892915	0.654712	1.01673	0.818074	0.732944	0.909371	1.1033	0.823437	0.573691	1.20929	1.24329	0.906787	1.3236	0.925701	1.08051	0.602923	0.800855	1.13467	0.695097	0.763961	0.516967	1.17852	1.271	0.583102	1.04328	0.637701	0.901373	0.904483	0.906041	1.30883	1.1531	1.1343	0.994472	1.2205	0.468078	0.931302	0.810572	0.871894	0.680483	0.904715	1.38872	1.09994	0.829721	0.945395	1.16459	0.643692	1.40044	0.784598	0.954262
PANX1	4.38383	2.8808	4.73519	3.89348	8.80678	5.02945	4.14343	3.96355	4.07165	4.55292	6.36325	8.2733	4.36794	3.28832	5.396	3.58798	3.38466	15.7289	6.07001	3.51051	3.32953	8.42798	3.50285	5.52699	5.89156	4.30291	4.92047	4.02042	6.69475	9.62823	5.46838	6.4567	3.93108	5.14527	1.89627	3.71933	3.90357	9.50886	3.21258	5.32388	4.09538	9.87746	4.07615	6.75153	9.78492	3.97824	4.81338	2.85133	6.86871
DNAJB6	1.34926	1.72495	1.69227	1.12158	1.27038	1.30404	1.49871	1.16773	1.19516	1.21707	1.86444	1.44983	1.2608	1.64358	1.79104	1.38131	1.11902	1.54232	1.6677	1.57377	1.02465	1.44197	1.24828	1.07272	1.32689	1.1488	1.31228	1.46072	1.5386	2.37368	1.46562	1.75489	1.39661	1.80177	0.774458	1.68013	1.4791	1.57205	1.50613	1.90619	1.40507	1.98324	1.28005	1.50138	1.70584	1.15593	2.09445	1.17025	1.91837
BACH1	4.13263	4.08522	5.60628	2.00083	5.86695	3.35411	3.76187	2.07364	2.57755	4.45109	5.04472	5.63502	3.835	2.52943	5.82494	2.74354	2.57391	8.20602	4.55171	1.75495	1.65211	5.50811	2.373	3.84772	3.2281	2.44781	4.01337	4.53641	4.41183	5.22919	3.29957	5.21102	3.55507	3.30721	1.24793	4.01216	2.62876	3.93579	2.49508	5.36346	3.81545	7.43475	2.3176	6.3012	8.20677	2.46544	3.03518	1.63606	3.35799
LONP1	10.6464	14.0292	17.9204	15.2753	18.778	15.7132	14.1116	19.1642	14.9218	12.8746	14.4793	16.7198	18.2586	17.6228	18.3702	19.3235	19.5368	13.355	21.3729	12.2117	24.255	16.3479	18.5328	17.878	14.1384	19.6853	15.357	15.1694	20.4817	19.1128	18.2976	14.7607	17.6821	16.5839	14.2039	11.4369	16.8117	17.4362	12.6512	31.4502	12.9058	15.5935	20.435	17.5024	15.8646	16.7185	11.705	11.505	21.3274
PTGS2	0.0617095	0.480471	1.22506	0.125162	0.193562	0.273655	0.594925	1.00303	2.97505	0.718862	0.288399	0.234315	0.672665	0.230413	0.804211	0.232518	0.381566	0.576507	0.464976	0.534699	0.387856	0.963727	0.331352	0.500056	0.126374	0.153753	0.347173	0.170892	0.362103	3.9399	0.335408	2.44892	0.43146	2.93806	0.0783308	0.809943	0.512857	0.476083	0.321881	0.496781	0.434285	1.77201	0.698056	0.893462	0.327329	0.295358	0.836987	0.280333	0.441252
DUSP1	75.6906	182.725	340.769	266.855	264.17	100.174	466.294	351.263	187.349	168.639	68.1137	119.181	435.376	113.873	160.876	104.351	240.963	217.925	139.914	271.166	138.509	97.1646	302.175	92.3867	120.978	332.705	162.438	123.927	202.533	406.295	164.182	139.759	212.229	308.814	252.13	100.617	143.238	189.932	203.341	103.752	293.89	289.809	230.177	321.474	269.175	250.782	189.516	351.145	120.68
NOS2	0	0.0114382	0.0241987	0.0411968	0.104667	0.0378966	0.0702567	0.057325	0.0307963	0.0444614	0.0779749	0.0583985	0.120236	0.0590525	0.50735	0.082512	0.0470575	0.0606165	0.395665	0.0276172	0.0889765	0.101331	0.0371624	0.116343	0.121933	0.0851687	0.0201398	0.0588053	0.0463052	0.0960379	0.0778681	0.15428	0.143017	0.117384	0	0.0521394	0.0508427	0.0605011	0.0358349	0.0870563	0.0484378	0.0789596	0.510976	0.148452	0.0177635	0.0511499	0.191654	0.00421078	0.0927905
NCF2	1.57317	2.65911	1.98018	0.803	1.59853	1.65751	1.12859	0.716961	2.73296	1.52823	2.93471	2.9672	1.83084	1.9112	2.99699	1.00683	0.939607	2.21416	1.5178	0.754007	1.43557	1.79206	1.35156	3.191	0.943097	0.28343	0.868898	1.91037	1.81835	8.65533	0.956063	2.70159	1.6647	3.78576	0.046986	1.47238	2.5116	0.986154	1.34018	2.25354	1.25214	0.859427	1.33288	1.90555	1.17174	0.922315	11.0843	0.348322	2.14502
MT3	0.0147499	0.0130011	0.0206289	0.0156086	0.0396561	0	0.0168118	0	0	0	0	0.00829723	0.0160782	0.0103263	0.0258211	0.0104207	0.0329152	0.0229663	0	0.0358751	0.0632087	0.0115176	0	0.0101723	0	0.0107562	0.0228916	0	0	0.0623772	0.0153926	0.0487112	0.0104876	0	0.0124818	0	0.0105072	0.0491198	0.0633596	0	0.013764	0	0	0	0.100953	0.00830554	0	0.038289	0
UBC	69.8591	137.386	114.11	54.4294	153.644	90.9199	85.2263	43.5941	65.7104	123.382	95.6441	61.144	80.1507	59.3417	117.541	87.606	91.1361	97.7449	124.79	90.6582	67.0234	83.1278	55.0213	61.4286	84.9993	124.597	76.2121	73.8981	86.3072	113.387	93.7259	94.9506	69.0118	91.7851	65.211	56.707	62.332	79.6496	76.2607	84.2603	116.865	79.6357	68.3912	131.094	73.1719	55.7646	103.064	64.9777	106.433
ALB	39295.5	37456.2	31623.8	42652.5	39454	13804.6	55227.3	54790.9	53484.8	17328.9	38016.1	33276.2	37505.3	42829.2	26988.6	28123	40451.8	14182.6	33049.6	36896.9	17275.5	46358.5	31440.8	43614.8	31626.5	29556	16913.8	25598.2	45301.8	31171.6	44486.6	30203.8	47718.7	37308.1	30638.2	39517	40572.5	30469.4	20070.2	12849.3	35771.2	32660.5	36798.2	29219.5	28346.5	47628.3	33033.4	31549.4	30778.8
TXNRD1	6.2488	7.29879	7.09735	4.54374	7.80828	7.28211	4.62467	4.02167	4.66517	5.29222	8.05806	7.86186	7.79118	5.03082	12.5066	4.66299	4.74582	6.52627	7.72503	5.27574	3.96049	11.2318	4.76583	5.48505	5.45955	4.09145	7.67627	6.93938	12.1361	9.28983	6.09744	9.52452	5.60339	8.88227	3.97193	6.39116	5.47573	8.18393	4.21385	15.9309	5.75385	7.24656	5.09802	6.87068	8.02849	4.86968	7.1344	3.8246	10.7926
SRXN1	0.602571	0.531128	0.332414	0.154099	0.479265	0.312837	0.194595	0.191107	0.296594	0.19269	0.469353	0.36156	0.262733	0.288269	0.480546	0.184475	0.218509	0.328381	0.327326	0.0977057	0.215186	1.04299	0.287603	0.207782	0.435529	0.34421	0.428623	0.343852	0.434808	0.481339	0.214849	0.411261	0.264208	0.32821	0.0934843	0.322808	0.4364	0.595311	0.184886	1.18577	0.299891	0.527453	0.249756	0.193874	0.384925	0.197926	0.175566	0.162938	0.933546
GPX2	24.8904	31.1483	59.5015	105.109	18.2728	209.964	13.9068	29.5812	30.352	112.666	38.944	32.2431	59.8199	40.7104	297.901	297.307	14.0776	157.47	48.9368	35.0505	399.328	42.3156	81.4775	84.2202	35.2622	127.677	357.005	203.396	85.0537	65.3071	49.6957	45.4277	29.8819	105.963	322.324	106.412	17.8853	170.739	99.8197	263.044	49.1775	38.1706	78.6112	66.9075	47.2103	64.6119	59.3525	151.583	373.373
BNIP3	29.7454	23.7303	22.9362	20.0421	23.1418	25.7067	25.8657	20.052	16.3384	21.4171	23.6251	24.9715	21.8028	24.3312	20.453	18.2818	26.6305	17.1182	20.9472	27.1455	24.2386	18.4427	19.3708	23.6829	19.6611	23.7909	25.7976	19.8098	21.8012	22.9631	20.179	21.1051	22.0163	18.08	24.7741	20.6773	29.6077	26.7963	24.9874	28.4005	24.4577	20.8168	20.0019	27.4988	21.0665	23.4982	18.1062	21.223	19.7098
OXSR1	3.51909	3.62079	4.98616	2.40476	3.60944	4.06676	2.67656	2.96149	2.24633	3.93347	3.21901	4.49608	3.79466	3.66587	4.95546	2.56498	2.84162	4.03256	4.09851	3.31682	1.72021	3.54546	3.768	2.51922	3.38816	2.58576	4.00444	3.57521	3.56077	4.97644	4.64522	4.304	3.89121	4.09699	1.90982	3.25436	3.155	3.95986	2.81365	4.46131	4.08715	3.78799	3.22132	4.06276	3.66629	2.98114	3.79371	2.42272	4.32143
SELENOS	10.267	9.80435	10.2033	6.27745	7.59723	5.52827	5.82651	6.76244	6.62871	6.05426	5.79309	8.99303	7.11725	8.432	11.5918	9.02751	6.47441	10.4222	12.1183	8.09782	10.742	8.09009	7.09812	7.08063	9.07971	7.1198	7.59858	7.13659	9.87561	12.6879	7.18169	11.3196	5.68867	8.59076	6.16153	7.30213	8.73345	10.9832	7.57195	9.943	5.98879	10.3224	6.86636	8.18957	13.6946	7.39367	11.2505	6.55556	18.0877
ANGPTL7	0	0	0.0112884	0	0.0569636	0.0235711	0.0206993	0.0164563	0	0.00829628	0.0565823	0.0136211	0.039592	0	0.0141297	0.00855353	0.0742983	0	0	0	0.0103766	0.0472695	0	0.0333986	0.0262524	0	0.00939495	0	0.0172806	0.0768009	0.0126346	0.0399832	0.017217	0.120114	0	0.0291869	0.0172491	0	0.0222887	0.0243664	0.0282446	0	0.0627274	0.0692513	0.0414324	0.0272695	0.0364916	0	0.00721428
SLC7A11	0.00842787	0.00495242	0.027503	0.0341876	0.0151059	0	0.0288181	0.0171831	0.00888926	0.00770018	0.0337608	0.00948182	0.0107179	0.00196677	0.021311	0.00595421	0.0141054	0.107897	0.00295364	0.00341641	0.0168543	0.0350985	0	0.0154994	0.00406103	0	0.0174398	0	0.0414341	0.0217808	0.00732926	0.0630877	0.0299623	0.0426263	0.00237731	0.0112874	0.028017	0.00748434	0.0310309	0.252542	0.00917531	0.134949	0.0116441	0.0301292	0.0192277	0.0189826	0.204911	0.00546943	0.0786771
DDIT4	7.14914	11.0363	12.9877	5.05748	14.4511	10.3385	10.482	7.20298	3.10369	2.58928	4.49178	7.94688	36.3167	8.4063	23.4555	16.9848	31.6429	8.89019	17.1232	11.7923	11.9048	4.28708	26.2987	10.5509	15.6065	15.1218	13.6699	24.6075	7.45418	33.3887	8.58731	24.3751	2.74289	5.30164	9.69308	10.9819	5.04584	8.87424	43.9519	21.6044	18.902	24.3368	16.7124	45.3921	12.814	13.0332	18.9765	3.25539	9.99486
ASNS	0.0790669	0.33774	1.14267	0.0707975	0.257545	0.0986757	0.162909	0.260408	0.147546	0.262565	0.613158	0.167645	0.241986	0.191611	0.511067	0.352348	0.0712554	0.454563	0.364492	0.299557	0.854893	0.807369	0.13934	0.50334	0.272554	0.0887055	0.283177	0.293987	0.436946	0.831645	0.222148	2.38218	0.307042	0.763127	0.0669089	0.175947	0.524245	0.299764	0.462805	4.13734	0.158915	0.568744	0.32772	0.578365	0.287231	0.256857	1.04125	0.134201	1.46778
TSC22D3	12.7348	20.2951	11.1528	18.3613	17.7459	23.7713	22.1678	15.2656	8.75778	6.49808	11.0948	9.50148	32.4111	18.9496	23.2755	10.451	23.1788	6.02238	13.706	19.6249	20.884	5.95314	22.3701	5.04606	12.2125	9.34061	5.91601	16.0474	11.2495	24.3311	14.325	5.05052	4.68103	19.2466	7.43778	3.08373	11.939	11.3483	16.3622	9.58067	23.8548	10.8475	18.7453	27.9499	9.21809	7.41416	36.2144	5.84419	9.60399
DDIT3	7.42668	18.1481	12.2825	5.2771	12.76	3.79181	8.05016	3.98546	3.00237	7.39163	8.13058	8.34338	6.90564	4.70491	8.84225	9.35971	3.5343	11.0305	6.66068	13.3523	13.8126	6.5011	7.50822	8.26575	8.36896	9.3177	5.14852	4.61227	6.65951	13.471	4.86906	26.1238	6.14801	7.9688	7.7155	12.0046	12.3647	5.27429	7.7752	20.6039	14.2001	7.82734	4.98995	13.7876	16.4797	5.53167	10.0118	9.6116	13.3653
JDP2	2.36842	3.89177	3.24151	1.55207	2.09139	2.14336	1.32499	1.65687	1.54698	2.15598	2.75632	2.59127	2.22642	1.97453	1.99319	2.08775	1.70195	2.91636	1.58088	2.59488	2.23476	4.26211	1.66764	2.29273	1.73385	2.76026	2.67081	1.72423	2.09859	5.04783	1.72107	2.46561	1.22053	2.80748	2.06307	1.71463	3.12667	2.87415	1.76808	4.02613	2.67444	2.40207	1.72018	1.99479	1.69241	1.48046	4.85687	1.114	2.69567
SESN2	4.00196	3.38222	6.57377	5.33519	4.26162	4.87342	6.39937	7.10878	7.11784	5.46312	4.10212	2.34391	6.56061	7.98224	9.14876	3.23204	5.89243	1.77977	9.75997	3.47357	5.16512	4.06858	5.382	3.90182	9.78364	4.37185	3.34295	4.90715	4.20005	4.50759	5.47837	5.30727	7.62709	5.72884	4.1303	4.04192	6.45627	2.79088	3.95821	9.77565	4.10425	2.75923	5.62674	7.16461	2.58332	6.98574	4.39443	4.81236	4.84881
SLC1A4	1.20269	2.06512	2.36106	1.99376	1.84247	1.338	1.51101	1.18359	1.92545	2.649	2.44018	1.37945	1.20245	0.877533	1.70211	2.06904	0.779888	2.98731	2.24569	1.67629	2.28915	2.79299	1.96812	1.24415	1.05274	0.879892	2.11501	2.50482	1.52155	2.91187	2.41239	3.96152	2.35998	1.82077	0.954968	5.18056	2.33657	1.26137	1.25802	5.1606	1.24255	1.7282	1.26242	1.67794	1.09844	1.05541	2.03847	1.80936	1.33325
PCK2	161.274	135.493	135.641	149.857	177.821	112.896	170.338	143.29	203.307	88.957	141.992	175.449	186.912	200.527	133.366	104.004	208.493	63.5069	189.058	140.473	126.803	143.079	174.566	187.641	154.692	169.54	142.619	114.757	156.724	99.3232	194.859	112.57	198.632	131.443	155.364	119.164	145.01	97.2596	81.2515	145.028	139.88	103.075	120.772	161.367	155.347	175.031	82.0698	120.932	154.333
TXNIP	21.2953	97.1595	239.508	100.375	43.915	36.24	47.718	41.0403	65.4242	175.918	70.9335	48.9805	146.301	88.3952	57.0815	59.0337	89.6346	98.9378	74.3672	93.0952	65.7095	20.4166	92.7289	24.8724	108.316	45.7322	38.0264	85.7259	78.6141	99.1506	60.8856	29.8736	103.456	59.8702	75.6314	11.3822	82.1908	30.2437	52.3682	104.295	92.5344	64.4438	64.6037	69.262	39.6892	66.7659	108.69	118.365	105.608
VLDLR	0.110251	0.0971791	0.200182	0.050659	0.117007	0.0884944	0.0578711	0.106477	0.264705	0.202788	0.176272	0.228492	0.196082	0.136091	0.157451	0.143484	0.179667	0.233405	0.298941	0.13937	0.126819	0.117808	0.191101	0.0820373	0.0859788	0.0465469	0.393996	0.149006	0.343714	0.19836	0.130194	0.10923	0.123776	0.761936	0.164499	0.046629	0.163276	0.199037	0.110386	0.718218	0.0798687	0.0910558	0.282602	0.292494	0.188648	0.163372	0.197634	0.101676	1.19808
GPT2	35.313	44.3532	57.9521	50.7553	60.5636	37.3626	34.1034	28.3783	19.3787	18.9499	42.0624	33.7056	42.8322	45.519	30.7091	30.1121	23.9139	21.5948	15.0823	30.0938	35.8796	39.402	16.706	29.6884	46.384	34.9719	17.8194	29.6647	41.3643	55.2286	31.0376	24.6816	42.9917	20.9343	21.6264	15.4408	58.8925	45.9232	36.1411	38.0197	22.4931	49.0318	23.2338	22.0104	47.0721	41.5865	36.1196	20.3212	40.8772
PSAT1	86.8224	51.1172	67.148	44.4903	73.4892	57.7588	45.0688	49.1083	54.8983	48.1997	80.9346	65.6354	79.6705	90.0357	39.5206	43.6662	70.2619	51.8687	32.5241	51.716	49.9483	91.9901	36.4215	62.6954	47.1975	48.3683	64.9708	32.1741	66.1418	17.7798	84.6931	70.8662	50.1016	60.0059	36.5001	54.6226	91.348	59.831	44.8134	81.6568	70.2894	48.2801	62.621	55.5692	66.832	118.865	42.2375	28.0721	29.6715
LURAP1L	19.3431	8.79371	30.6788	5.6956	28.813	11.423	4.38914	5.08732	5.69703	11.6697	15.095	20.9971	21.8469	14.9478	16.8346	21.3785	12.103	32.6774	10.0616	12.0708	7.45049	10.7377	12.1561	19.2212	32.6283	26.4135	22.16	24.9948	22.0701	23.2094	6.89665	16.1757	3.65074	6.96441	8.65758	2.34891	7.38753	25.1231	29.9714	10.5807	19.7876	23.4025	11.7601	18.3008	23.2597	5.36009	13.3918	8.94058	13.5329
SLC7A5	1.47327	3.40755	1.90341	3.04858	1.589	2.44212	4.2306	2.54195	1.78882	4.48036	0.953118	1.71212	2.356	2.43465	1.76272	1.31518	3.23034	0.886164	2.32946	1.62152	2.56944	3.44233	1.67619	1.26415	0.870872	1.93219	1.06348	1.60436	3.3091	4.51988	2.79187	1.87828	4.37693	2.20945	3.10715	0.357919	3.36001	1.97771	4.33819	2.02652	1.55597	2.60775	3.92306	3.03355	1.62587	4.49519	4.35449	2.33839	2.12325
HERPUD1	22.3913	18.5876	27.7751	16.9952	25.7901	19.0644	17.4097	17.8859	21.3635	27.3806	17.1287	14.6832	34.3054	29.5379	24.5004	36.5217	31.1915	22.108	17.8996	29.1863	17.1412	17.9113	22.3453	14.304	18.0077	25.1445	21.5724	22.5643	25.8127	18.9015	27.6702	24.0205	19.561	21.4047	21.6704	17.5877	16.2352	13.1315	17.4563	22.987	26.2336	17.8426	21.1161	23.3867	20.3655	18.4597	27.059	22.0596	18.9957
SLC3A2	8.77023	18.4173	10.5045	9.90652	18.6552	7.93963	12.7786	10.7934	11.9548	8.07513	12.1475	12.5368	10.755	10.6424	11.3896	7.5048	9.31852	14.9566	17.9521	10.166	8.86667	20.2548	8.27952	14.7565	10.6923	12.505	8.98209	9.912	10.1577	17.7848	10.9272	20.2018	14.0047	11.3755	13.2093	13.4602	18.8321	12.1147	6.5058	28.944	6.65562	15.2028	7.64005	9.9821	19.8775	9.13728	11.6367	8.76495	24.5239
CBS	1.92856	1.96034	0.858124	1.71337	1.28821	2.25436	1.19465	0.0108544	2.76904	2.3886	2.2846	0.891701	2.54617	1.55983	0.528902	1.42175	3.15424	0.0145065	1.08309	0.672524	0.612569	2.1295	1.99534	1.60815	0.0519478	0.0960878	0.972905	0.993157	0.0455928	0.650103	1.67716	1.59555	1.15833	1.45171	0.0270311	0.0192515	0.0284435	1.23928	0.455746	1.39022	0.89051	0.447544	0.839904	2.16398	1.5304	1.91559	0.599334	0.681499	0.654292
ATF4	80.2414	80.8642	105.842	49.904	82.3745	31.2022	66.8279	53.852	47.3588	50.0218	63.7474	75.913	57.1033	62.296	42.3391	60.7102	42.1441	42.1276	35.1283	93.2701	67.1283	100.1	54.3074	69.8254	66.0289	77.9991	75.5812	39.6587	61.9185	96.9476	51.1987	145.713	49.1224	59.7537	72.4813	95.3302	87.2648	64.9076	36.403	108.045	57.5892	68.2099	37.6144	54.8672	86.212	47.4894	74.2616	69.4136	74.5303
ZNF419	0.29437	0.292275	0.339139	0.3312	0.172842	0.193231	0.325879	0.326532	0.185578	0.227219	0.501501	0.161785	0.335632	0.312684	0.414628	0.26056	0.194428	0.147514	0.305939	0.304495	0.185597	0.171736	0.300381	0.298685	0.188311	0.222068	0.249433	0.350952	0.275277	0.314799	0.215391	0.270414	0.329597	0.327786	0.151754	0.212079	0.455548	0.315501	0.207634	0.522077	0.217861	0.190709	0.364633	0.321755	0.180635	0.381051	0.534393	0.3162	0.481866
KLHL24	3.30786	1.42746	3.83917	3.04133	3.44661	4.40719	3.47036	3.67227	2.65801	3.39788	3.54066	3.48893	5.28909	4.99347	5.89673	2.49631	3.41472	2.78497	4.95327	3.11608	1.58936	2.43376	4.2924	2.26182	3.95309	2.57668	3.18184	3.74744	4.48291	3.14176	4.33297	2.36689	4.30529	3.6287	1.65408	2.2302	3.24671	2.48689	4.06169	3.57032	4.77045	3.26425	3.8918	4.90709	2.63491	3.45714	3.49521	2.78502	2.21558
TRIB3	21.3277	12.6092	36.7512	9.79424	10.8085	7.4197	4.78449	10.5211	9.9036	8.80233	10.8731	13.1559	8.27409	9.37979	5.54357	12.4478	8.3241	21.7662	6.49564	18.5051	13.9581	28.8163	14.213	8.94057	9.95754	19.8282	19.1156	8.31124	11.5587	10.2385	7.59606	34.5891	5.4476	6.31771	10.2961	10.0054	22.1852	18.9505	7.3114	74.6785	12.6275	5.92802	11.6019	9.74859	8.3923	4.08312	8.24293	8.85868	15.1535
ZFP69B	0.193053	0.140135	0.121764	0.0540773	0.0457974	0.117915	0.0323589	0.030871	0.1078	0.116725	0.106145	0.0638811	0.160923	0.143106	0.284945	0.13639	0.00633542	0.141456	0.250732	0.0759563	0.0973297	0.159615	0.162605	0.133139	0.0656641	0.0496877	0.105746	0.148665	0.183699	0.27214	0.254795	0.217518	0.113043	0.172309	0.124928	0.191635	0.097075	0.0756355	0.0905934	0.190458	0.164254	0.0727347	0.17651	0.251704	0.0310899	0.12789	0.253288	0.0736975	0.230071
ATP6V1G2	0.0883416	0.0778674	0.147086	0.120194	0.0339303	0.0491402	0.115075	0.0857688	0.206322	0.16431	0.042129	0.0709922	0.240742	0.123695	0.110464	0.0624125	0.147854	0.0458506	0.0530748	0.0613903	0.0324493	0.12811	0.0180706	0.208885	0.100339	0.064422	0.0489658	0.139796	0.0660479	0.186798	0.158042	0.125034	0.0628135	0.0810153	0.0213592	0.111555	0.251723	0.0504331	0.0697002	0.160861	0.117767	0.202078	0.0915405	0.13535	0.086377	0.13502	0.243445	0.147423	0.0676805
VEGFA	5.68912	8.30139	4.90267	5.57028	5.06697	3.64694	6.2704	5.46401	3.37755	6.2362	5.40913	10.9549	5.24973	3.73054	3.91581	5.12296	4.80693	6.8371	3.46253	4.81447	2.46535	8.70299	7.23472	8.13448	5.60754	6.00264	6.49674	5.41705	4.33523	9.07183	3.62001	13.9429	6.59904	5.67158	4.05959	10.7049	6.53244	6.49408	4.26544	5.2664	5.8888	7.3971	4.06239	6.42502	10.7781	4.69211	4.07803	5.09578	4.9485
GDF15	4.82969	45.0425	52.0401	4.4033	34.26	14.989	15.4195	7.73818	7.74385	8.84316	16.0099	10.8527	17.1949	2.3087	24.463	10.218	4.25893	91.9858	5.74672	21.2833	22.7333	43.664	5.68858	21.5786	4.69198	13.8229	15.0415	10.3416	22.688	99.6802	19.1444	67.6671	9.72059	54.0299	54.8674	30.7248	19.2093	99.3213	20.4596	46.9284	11.9396	43.2407	14.1662	32.6659	6.55789	10.2788	13.6727	5.81367	63.1123
TUBE1	3.56327	2.12355	3.03792	1.72498	3.01924	2.22921	3.4989	4.05105	3.20709	2.25265	2.01838	3.94548	3.90109	4.89403	4.35356	2.20445	3.03063	2.26888	5.71964	4.16084	0.762661	2.19983	5.06878	2.70932	3.67645	2.3151	1.58908	2.79	5.3318	2.21845	4.41601	2.07376	3.12485	3.04779	1.48959	2.8134	1.87398	2.80029	2.33446	2.39306	4.48725	2.8696	2.94337	3.83683	3.20212	4.93406	2.56026	2.21663	2.6697
ARRDC3	7.23245	20.7077	8.19245	2.40879	30.4519	7.87254	4.44723	11.2152	15.5261	13.1181	9.55106	26.6071	10.4278	12.572	5.86749	5.75758	10.2328	16.1409	12.021	5.87366	4.01952	21.0378	5.52791	17.4746	5.86259	2.82731	7.67057	8.36156	4.20393	17.0735	2.61329	40.0404	20.5739	6.47699	1.35233	21.5263	14.1614	11.4922	13.3046	10.8791	43.8918	50.2556	4.60928	9.41953	33.7225	11.0394	5.51517	3.99868	8.17094
CEBPG	8.94997	11.197	20.9508	8.25868	10.5697	6.90445	11.3178	9.14675	6.75762	9.13831	12.8981	12.1183	12.3138	8.75151	8.2909	9.18299	7.74493	10.4795	7.42067	12.9982	7.12322	15.2532	9.34097	8.48116	10.9043	11.163	13.6089	8.77768	9.10081	17.9072	9.42649	20.0712	12.3954	10.8155	8.49382	9.3491	10.6157	11.251	8.4475	29.3697	13.055	9.64707	8.68846	10.0401	8.89208	6.39554	9.76464	10.9986	14.4289
RGS4	0.235322	0.360517	1.08399	0.379461	0.38036	0.738121	0.277797	0.289394	0.336849	0.64117	0.228185	0.173348	0.329802	0.133367	0.333486	0.233545	0.215679	0.863673	0.341666	0.187378	0.412979	0.756887	0.280793	0.231843	0.433317	0.138919	0.182607	0.902752	1.22356	9.49757	0.418063	14.7657	0.139434	2.53736	0.00948269	0.24763	1.31313	0.932932	0.601694	1.89441	0.564667	0.269145	0.7025	0.673009	0.191741	0.173522	1.34087	0.170897	0.667723
BLOC1S5-TXNDC5	0.0492349	0.22422	0.0688587	0.0868352	0.115825	0.0532526	0.0514411	0.0390375	0.0389477	0.0506068	0.0547855	0.106168	0.09392	0.103407	0.067037	0.0289867	0.0595131	0.0425894	0.0258824	0.0948022	0.147692	0.0320379	0.0469989	0.107524	0.0533794	0.0538559	0.0700439	0.0247901	0.0429452	0.0231348	0.0214084	0.178857	0.0350075	0.0670436	0	0.243978	0.134446	0.0437229	0.0856043	0.181663	0.0842307	0.0735805	0.0510178	0.0528036	0.10671	0.0184825	0.0741989	0.0372773	0.0440067
EIF2S1	7.01964	6.09861	8.15441	4.71879	6.28447	6.31979	4.39122	3.73766	4.75389	7.10681	6.55293	7.74643	6.81028	4.35046	5.81971	4.49183	4.90859	8.12525	5.92847	4.61236	3.77664	6.94902	4.66175	4.93369	5.60047	4.87073	5.67785	5.30649	3.76406	7.79323	4.48838	9.14618	4.40478	5.84827	2.51567	6.73123	5.61872	5.85054	5.14328	8.94232	5.95759	7.71754	3.7959	6.48625	8.52597	3.5126	6.03515	3.58468	7.81992
IL6	0.06548	0.750313	0.170947	0.0138584	0.264071	0.169976	0.15673	0.320408	0.283165	0.0717915	0.078691	0.0957691	0.0856518	0.0550106	0.909389	0.148035	0.0438366	0.652514	0.178996	0.199077	2.68258	0.480627	0.0187519	2.01406	0.274502	0.200552	0.406494	0.131879	0.0186922	14.3903	0.109333	5.44074	0.0372466	1.70432	0	1.04184	0.792967	0.479731	0.241093	0.131784	0.433833	4.11005	0.664941	1.82588	0.385423	0.0516196	0.189467	0.0424945	0.257517
CXCL2	39.6138	90.4849	62.3503	40.5914	54.9398	10.2573	65.4933	25.3384	32.4181	84.9381	32.8397	56.1516	57.2104	9.56062	35.1534	51.1113	27.9652	12.488	12.4967	25.9326	63.4449	45.4611	28.5033	67.832	69.9943	84.8721	46.1729	30.6509	59.3432	82.8463	35.6658	72.9222	41.8453	55.0809	21.9356	27.3764	54.3151	16.3142	63.7604	10.4944	67.0546	55.3377	36.8367	32.1076	77.4692	52.719	34.9758	49.3531	16.0164
RELA	7.11607	11.4432	8.48435	6.74844	9.44268	8.68259	6.4378	6.64933	7.70701	7.63887	10.5648	9.09667	8.97311	7.74541	9.41897	6.42531	7.33684	10.5833	10.073	4.88781	6.80875	10.2537	8.4923	8.83368	7.55917	7.9268	8.03094	7.96997	8.30954	10.9365	7.20621	10.7693	7.21056	8.29415	5.37559	8.59939	8.97262	6.44711	5.45624	16.1081	6.77231	8.03566	6.53104	8.47394	11.791	6.2967	8.92013	4.76293	10.9893
HSD17B11	59.3433	109.352	52.7005	65.4298	53.3199	57.7709	77.5254	52.7935	76.4062	78.5307	76.8851	23.3857	70.4791	37.9857	41.2843	28.4901	33.2311	47.8547	54.1328	56.0103	47.1324	43.8102	29.3651	51.4704	23.2679	54.2545	58.7689	65.4184	69.8304	59.9209	49.1148	106.74	71.0579	45.1458	55.0017	65.0967	104.959	44.7497	42.4254	68.5962	66.9391	49.5761	39.0307	63.4418	52.3529	67.2323	68.9837	63.2743	39.4853
AGPAT3	7.16249	5.12927	7.22612	10.4808	7.13425	8.37638	7.76048	7.34724	8.7475	12.2586	9.17161	8.92176	10.5294	8.7744	10.9163	6.4329	10.454	6.32189	11.4295	6.46861	7.2078	11.242	9.20138	5.17948	7.26956	9.01371	7.92752	9.52196	8.77265	7.48291	8.24433	5.73524	11.4629	8.59648	5.43593	4.63572	11.4348	6.54701	6.57382	10.4919	5.86451	6.00555	13.4568	7.23746	4.31779	7.59082	7.6029	7.84098	9.00183
SETD1B	2.1477	1.13469	1.20787	1.90544	1.92767	2.05154	1.58614	1.8295	1.38357	2.15507	2.40216	2.51528	2.44768	2.3478	2.19272	1.19729	1.81818	1.66442	1.75779	1.946	0.882659	2.10459	2.81392	2.59148	2.06113	1.66363	1.84615	2.20215	2.37701	2.01912	1.39783	1.62519	2.79695	2.36221	1.11695	1.25707	2.0105	0.918177	1.43195	2.44653	1.31076	1.50083	1.69866	1.22567	1.66625	1.9746	2.20428	2.04733	2.16724
FTL	7157.6	5545.33	5220.85	5821.4	4799.94	4930.49	5464.63	6374.63	8294.25	3735.72	5105.24	4207.46	5778.03	6225.75	6455.09	5579.8	5689.8	4898.08	4146.35	5267.88	13999.5	7033.8	4787.13	6379.44	4657.52	5197.64	11325.9	5853.68	6204.66	6206.57	4701.99	4617.89	5350.73	6209.19	8162.73	5004.19	6083.61	7960.27	4818.6	9442.1	4046.58	3454	5522.84	4661.93	3800.51	6530.41	7711.3	6011.82	5120.09
MAFG	0.63846	1.17128	0.822757	1.23041	0.750114	0.508656	0.778	0.560903	1.45906	1.74289	1.30305	1.15921	0.727074	0.668656	1.09345	0.722439	0.64867	1.22311	0.851362	0.577594	0.965395	3.29932	0.713519	0.669421	0.472725	0.82519	0.757255	1.31724	1.36816	2.4732	0.66628	1.17253	1.45416	1.90237	0.347012	0.508881	1.30527	0.909246	0.911002	1.48692	0.542503	1.02398	1.32854	0.998343	0.692778	1.02008	1.76166	0.768047	1.87437
IL33	12.2942	6.97476	10.8882	4.88313	2.89445	8.40011	4.55703	3.52668	4.56842	5.79329	9.48164	3.94053	5.88805	5.80806	7.78649	3.53079	3.52699	6.5884	4.14226	5.5307	3.74793	6.41304	4.69912	5.64099	5.4063	1.02045	3.46446	5.75406	11.1199	4.20939	6.02381	3.98311	6.15936	7.21853	0.577987	6.64648	4.39674	4.69889	5.13695	17.8756	7.74548	3.64908	4.88517	6.33659	7.3086	4.58234	7.52663	1.59464	4.72504
FTH1	145.128	173.311	126.062	138.746	111.327	157.589	144.239	148.051	159.873	126.75	161.092	124.527	145.83	100.921	123.584	107.36	154.447	131.23	118.905	88.7979	187.979	207.274	111.328	131.477	130.839	113.055	148.621	133.391	96.9773	191.223	127.153	130.406	161.719	114.584	113.302	96.1141	199.977	173.408	94.3173	244.758	126.46	121.695	107.77	177.469	129.113	118.421	219.096	86.7604	153.836
SLC40A1	76.1118	44.8869	44.1673	36.126	24.1047	60.0334	74.4053	50.4933	71.2659	54.5091	59.3258	52.5198	47.3354	43.1085	65.3552	24.9387	41.1003	44.2612	102.28	44.2673	30.1683	33.96	56.7269	30.0279	36.6946	26.2162	50.7244	76.4566	47.1055	47.6828	46.1041	23.53	57.8329	55.3737	19.0264	54.5643	47.2737	38.2147	45.6082	69.372	54.8172	28.4846	36.208	79.0313	18.1425	40.2327	95.3613	23.9641	39.909
GPX4	137.048	127.045	72.7123	113.251	109.11	59.3188	123.962	119.854	175.777	44.9141	143.557	102.097	105.079	129.958	85.8845	119.038	113.758	64.0812	83.5306	128.108	195.479	109.017	128.71	150.306	109.872	118.114	112.273	88.0061	117.701	130.09	105.325	147.941	99.7737	105.974	183.161	118.853	192.358	136.185	61.1729	113.494	103.355	121.963	120.901	96.4911	115.23	116.58	158.774	105.714	92.2511
HAMP	113.775	680.722	19.8625	136.725	276.866	116.458	60.8689	32.1062	57.4333	135.392	262.163	109.829	37.2678	331.512	65.0621	600.429	152.333	190.113	82.3404	130.792	450.524	5.90451	73.9861	112.28	65.6237	219.031	54.8769	183.965	11.221	40.3909	137.713	109.056	144.045	128.645	4.36492	349.8	55.866	49.5113	79.2369	54.3328	93.8384	204.437	88.232	35.1869	495.969	102.34	150.324	152.989	64.5232
HSPB1	36.6637	84.8038	99.4459	50.5375	61.2679	32.2517	53.252	62.7493	83.0696	41.6339	90.2849	37.1722	44.2672	82.2862	72.4758	56.7372	64.0732	46.8538	51.9547	65.358	157.657	62.4894	42.4304	79.7321	56.4517	62.2884	99.5706	43.3999	59.9834	146.904	59.33	121.595	45.3937	70.2475	82.0061	70.9035	101.635	110.201	32.4305	145.93	51.9462	64.7236	80.158	74.1725	31.9262	35.1086	80.9485	66.8825	134.391
NFE2L2	15.2722	12.9421	18.6423	12.9841	15.9215	17.4811	13.6984	9.14414	10.707	15.5952	23.978	13.3581	14.1553	12.383	20.7113	11.7629	11.9838	20.496	17.2004	12.3891	8.13713	24.7319	10.4732	18.2396	12.7614	15.9521	21.9226	16.47	14.5451	19.0148	13.7078	25.5891	11.1973	17.9205	7.53567	23.1718	16.3221	15.1913	13.4626	20.7615	19.5903	16.565	8.95038	18.3556	16.9353	8.56388	18.9671	9.21415	29.1371
STEAP3	33.1123	31.4741	45.0888	55.5673	50.4126	61.1008	31.3775	46.5571	45.0986	79.433	55.6188	46.2306	62.1044	43.6024	52.5906	57.7179	49.799	49.1374	42.9879	38.6971	46.9802	55.0001	60.9944	37.9588	51.1072	64.384	44.4577	74.9608	42.828	35.3741	45.0611	45.8083	50.6561	57.1226	51.2312	49.0546	27.6579	30.1872	39.8408	41.7218	47.7092	26.5491	54.2149	38.5168	41.6432	38.3706	42.4489	53.8281	52.0041
DRD5	0	0	0.00542135	0	0	0	0	0	0	0	0	0	0.00633811	0	0	0	0	0	0	0	0	0	0	0	0	0	0	0.0234212	0.00553277	0	0	0	0.00826858	0	0	0	0	0	0.00713621	0.00780144	0	0	0	0.00831462	0	0	0.00701015	0	0
DRD4	0.0733802	0.0808499	0.162494	0.155304	0.0986436	0.0714314	0.0731833	0.199481	0.0483733	0.100566	0.159223	0.103196	0.0699895	0.115589	0.149869	0.168488	0.143283	0.133299	0.154301	0.301179	0.235845	0.114599	0.183875	0.215078	0.132595	0.0802673	0.156591	0.203211	0.0610965	0.206882	0.248877	0.218102	0.326097	0.160589	0.279434	0.0884499	0.36591	0.0610922	0.123833	0.172297	0.179748	0.129248	0.28514	0.170514	0.163227	0.0929692	0.110587	0.0476215	0.207695
MAP3K5	2.65693	1.89155	3.23475	3.90381	4.84236	4.14151	3.20015	2.10085	1.32574	4.89123	3.22028	4.639	3.12176	3.05486	4.85098	3.86249	2.61678	4.99618	1.34301	1.454	1.0948	3.34344	2.33385	1.61741	2.52975	2.96965	3.0847	4.78001	1.12796	3.65174	2.14618	1.32967	3.70202	2.96097	2.0711	2.47584	2.15111	1.98741	3.01318	0.829515	3.09441	5.61575	2.63137	2.29057	5.13025	1.75791	4.01334	2.47035	2.6549
SLC2A1	0.461951	1.05673	0.328164	0.296798	0.284622	1.04926	0.542198	0.306473	0.701858	0.832824	0.862836	0.430006	0.527528	0.327259	1.13601	0.155411	0.30067	0.784927	0.948247	0.197293	0.641021	0.549666	0.362226	0.568901	0.794979	0.280727	0.550505	0.664559	0.303511	1.40704	0.355821	0.864495	0.277628	0.914678	0.274573	0.760103	1.48867	1.15378	1.37352	1.0367	0.49009	1.91967	0.404597	0.743151	0.31241	0.972354	1.29953	0.242689	0.910993
SLC2A3	1.45619	4.61064	1.40079	0.330538	3.62822	2.83788	0.631807	1.18399	1.81432	0.738583	2.04723	2.2941	0.63061	1.18887	2.80334	0.85162	0.478598	5.26308	0.638306	1.66388	3.31809	3.12953	3.05518	3.15234	1.95557	0.40423	1.91858	1.23603	0.902123	15.504	1.05365	11.3847	0.556796	3.48398	0.491419	1.58378	2.05584	5.49984	3.51229	1.68522	3.0646	10.4285	1.72773	6.26267	10.0088	0.453334	3.03123	0.508198	1.75638
SLC2A6	0.390361	1.03223	0.838548	0.668226	0.51961	0.625872	0.65867	0.535791	0.322926	0.77625	0.761423	0.925716	1.02207	0.77164	1.72851	0.724614	0.461176	1.14808	1.14274	0.48403	1.12178	0.794913	1.01926	1.18242	0.708133	0.318156	0.421706	1.09451	0.939539	1.8882	0.750839	1.06671	0.718385	1.44727	0.304427	0.596616	0.872395	0.550575	0.488488	1.58667	0.567831	0.47063	0.67416	1.58159	0.424338	0.698215	4.66939	0.501697	2.47656
SLC2A8	4.46305	4.35951	3.75286	6.06965	7.33954	4.8168	4.52479	5.50843	5.50043	3.34661	3.79949	4.49345	6.63949	7.09907	7.13675	5.97481	7.03863	3.9597	10.8425	6.97949	6.44423	4.61616	7.05231	4.55745	6.1874	5.67421	4.57667	4.45962	8.11289	5.40651	6.34921	3.65402	4.8704	4.7583	5.83152	3.1097	6.43227	7.15341	3.42876	9.94479	5.568	4.37839	6.6761	5.88886	4.9054	5.62049	4.36202	5.13023	7.1315
SLC2A12	0.442699	0.475737	0.573913	0.882394	0.631798	1.16492	0.998801	1.16637	0.630042	0.689824	1.07294	0.559465	1.27582	0.908565	5.45676	0.312763	0.707097	0.261243	2.42925	0.26181	0.25988	1.03706	0.599157	0.777907	1.05198	0.402436	0.470589	0.873288	1.68499	1.04722	1.23724	0.320439	1.20303	1.11128	0.343835	0.297265	0.5184	0.500846	0.312601	0.12205	1.15161	0.442796	1.07456	1.89048	0.236588	1.97375	0.658025	0.295169	3.54855
SLC2A14	0.0048602	0.0428396	0.0158605	0.00514314	0.0555346	0.037849	0.013849	0.00330306	0.00768941	0	0.107081	0.00273399	0.0344361	0.0238182	0.161657	0.0137347	0.0189801	0.00756755	0.398575	0.00295527	0.0249932	0.0113854	0.0417553	0.0670368	0.0245902	0.014177	0.0150858	0	0.0231235	0.0822148	0.01268	0.118775	0.00345575	0.0680726	0.0411285	0.00390555	0.0103866	0.0258965	0.0149124	0.00326051	0.0272121	0.00311291	0.025181	0.0833997	0.0199589	0.0547347	0.014649	0.00946237	0.417033
EIF2AK4	3.9294	2.22112	6.99991	2.57306	2.02272	3.49269	3.31899	2.90148	2.16906	5.13207	4.64472	2.80187	3.19143	3.04286	4.49065	1.96919	2.01391	2.76862	2.8495	2.5009	2.9366	2.50206	3.11172	2.35672	3.36915	2.48538	3.46944	4.8515	5.04894	7.07883	5.0903	4.38694	4.31011	4.5916	1.90613	1.719	2.96701	3.48647	2.90496	4.26272	3.02391	2.38902	3.12303	4.07001	1.31524	2.61327	4.47512	2.79124	5.09604
TFAP2C	0	0	0.00420357	0.00954176	0.0242424	0.00585159	0.0205546	0.0306399	0.0190209	0.0123575	0.126421	0.0355055	0.0442297	0.0189379	0.0315697	0.00637031	0.0150912	0.0280793	0.0284405	0.0109655	0	0.0140818	0	0.0310924	0.202034	0.0394525	0.0139939	0.0726407	0.0428997	0.0699088	0.00940974	0.0893336	0.0128225	0.0473592	0	0.173898	0.032116	0.126116	0.0221329	0.0120981	0.0841415	0.109729	0.0373734	0	0.0123429	0.0710822	0.0271774	0.0117033	0.182678
SP1	3.26502	3.27679	4.80859	3.96945	3.89116	4.05283	4.1379	3.95037	3.99002	5.92869	6.90887	4.67274	4.58399	3.16354	5.04869	2.77088	3.85809	4.85238	6.24527	4.22133	2.17203	4.37134	4.8815	3.56253	3.46959	2.70854	3.61574	5.10066	4.29659	5.80283	4.42352	5.59943	5.12213	6.29143	3.03812	5.44403	4.58246	3.40481	3.46824	6.281	4.26049	5.87214	4.01543	4.95651	4.49002	4.01865	6.07637	3.90495	5.33125
HBA1	0.162249	1.05829	0.423579	0.0858473	0.0218109	0.0842348	0.129451	0.176427	0.171131	0.177888	0.238314	0.492856	0.035372	0.0681538	0.227226	0.481436	0.325861	0.319997	0.238821	0.276238	0.333742	0.0506774	0.185857	0.268549	0.422177	0.2603	0.402891	0.13071	0.0771937	0.320203	0.101591	0.87875	0.0692184	0.0378747	0.16476	1.5124	0.115579	1.90192	2.58869	0.413616	1.51404	0.769002	0.201749	0.417623	0.133259	0.0365444	0.489031	0.168472	0.251368
NNMT	464.292	753.842	565.018	462.781	756.235	665.054	147.36	233.409	249.417	400.143	373.957	683.035	398.387	275.347	124.133	792.586	196.056	778.733	59.4547	368.097	1184.72	296.891	323.087	600.33	488.205	783.177	474.974	681.385	231.479	254.271	106.13	921.587	152.555	117.314	1115.42	817.954	306.804	525.448	777.174	327.796	274.929	739.787	141.23	137.052	1382.61	132.34	441.115	573.255	233.107
PLIN4	4.71321	2.91147	10.8209	2.02805	5.68391	7.64534	1.70952	3.23511	1.62478	4.14619	3.16956	9.14617	3.63314	5.50746	1.73546	3.25738	2.88452	6.69552	2.03517	3.3076	5.85241	6.87354	8.96364	7.62961	3.96875	5.23815	9.88791	3.72645	3.23046	3.4967	6.13374	9.44357	5.70287	6.67321	3.23995	2.4826	4.79119	5.26799	4.72258	7.38446	2.17516	1.92676	9.3604	3.77012	7.94917	4.08321	2.4342	2.701	1.17635
HIC1	0.267347	0.966162	0.289776	0.221024	0.348159	0.533506	0.39804	0.608671	0.246735	0.597682	0.624723	0.697433	0.260458	0.418789	0.684474	0.339981	0.378467	0.751023	0.657035	0.341379	0.552789	1.00727	0.401948	0.481682	0.200481	0.270506	0.261916	0.767283	0.564434	2.09162	0.592867	0.3951	0.437211	0.768402	0.149882	0.609591	0.571339	1.00383	0.828498	1.21735	0.410079	0.869009	0.470947	0.542388	0.333941	0.383878	0.733282	0.288444	0.663107
STMN1	2.39754	3.68488	1.46271	1.61431	0.674845	1.20765	1.6845	1.8441	1.1731	2.03138	2.26814	0.981079	1.16284	1.99663	4.40924	0.975332	1.27237	1.33645	1.82912	2.03412	1.8694	1.12869	1.14639	1.61168	1.42323	0.855251	1.15187	1.78244	2.06105	4.81945	2.85202	2.27529	1.39701	2.77057	1.18656	1.40148	2.34297	1.97732	1.98647	2.07003	1.63556	1.11151	1.2915	1.40788	0.808628	2.98761	3.84275	2.7636	4.03059
RRM2	0.869466	0.1205	0.35945	0.127307	0.0955629	0.14195	0.0747932	0.616916	0.057677	0.217334	0.262865	0.209174	0.22949	0.398149	2.73145	0.28975	0.0884709	0.298006	1.56382	0.442232	0.290579	0.18361	0.642059	0.328098	0.29248	0.235275	0.322496	0.401989	0.611396	0.539595	1.32394	0.122801	0.229401	0.414864	0.0694122	0.206529	0.19477	0.185747	0.741604	0.337501	0.224525	0.224155	0.407977	0.265866	0.134738	0.908355	0.481274	0.745245	3.05641
CAPG	0.904227	5.3501	4.28326	1.17134	1.18759	0.593553	0.817396	1.34207	2.31307	0.840397	7.60523	1.04069	2.4698	2.46669	4.36065	1.40983	0.713198	1.27846	1.90138	0.625656	2.86834	2.53212	0.699458	4.50139	1.7879	2.15251	1.56464	2.9201	1.79994	22.2625	1.28529	7.15997	2.52	6.85399	0.932294	1.9627	4.60517	1.36371	1.21819	2.1057	1.07171	2.42976	2.84322	2.01385	1.25911	1.52748	36.4954	1.11967	7.74763
HNF4A	26.8658	18.898	18.5563	40.672	32.3438	37.008	28.9592	30.1015	29.1125	38.5157	30.6204	30.5487	32.9715	29.6802	34.3169	20.6405	24.0649	15.2691	32.3494	26.4768	15.7043	35.9981	32.6152	21.5415	30.2243	28.4725	27.3759	33.0929	21.9352	20.1322	26.1955	13.0007	30.9159	24.7259	19.2817	14.7092	37.5738	21.8085	17.4734	33.938	22.561	19.2013	30.0661	29.1139	19.9733	30.5584	19.8501	29.6871	28.6384
NGB	0	0	0	0	0	0	0	0.00977418	0	0	0	0	0	0	0	0	0	0	0	0	0	0	0	0	0	0	0	0.0144828	0	0	0	0	0	0	0	0.011557	0	0	0	0	0	0	0	0	0	0	0	0	0
YWHAE	55.4872	60.0708	62.1178	54.2566	44.8461	47.4545	46.1805	45.9	46.2337	56.6761	60.7035	52.8379	50.4838	44.798	56.011	48.2526	56.2451	48.8459	55.4059	54.2021	51.8364	54.3218	47.1884	46.5875	50.1087	47.5154	53.0157	48.1099	51.3409	66.7207	56.1814	68.4924	43.3192	49.6331	48.3557	56.4683	56.7663	54.8435	52.4538	72.5298	57.5129	56.4754	43.6588	53.461	52.8924	45.0381	52.0537	48.5932	61.1114
GABPB1	1.11608	1.29131	1.43812	1.11137	1.16175	0.884749	1.11671	1.22806	1.04192	1.21764	1.52114	1.37394	1.14606	1.13079	1.4158	1.02195	1.06095	1.0398	1.24632	1.01866	1.06153	1.10426	0.906578	1.14101	1.55158	1.11215	1.15117	1.29843	1.15985	1.74757	0.988681	1.48349	1.32261	1.09904	1.14978	1.04355	1.53907	1.27585	1.09185	1.66489	1.2086	1.32756	0.909873	1.26389	1.11657	0.908203	1.69939	1.02722	1.42509
AURKA	1.20302	1.23983	0.547893	0.34764	0.422958	1.39928	0.379713	0.50313	0.292817	0.336084	0.352166	0.333159	0.489234	0.790395	2.44619	0.581868	0.454316	0.494704	1.06051	0.720246	0.491741	0.166199	0.636026	0.22337	0.521713	0.533119	0.251334	0.419349	0.893765	0.68486	1.51135	0.201702	0.342152	0.52385	0.23493	0.193343	0.415304	1.07861	1.49351	0.415943	1.25214	0.420823	0.50822	0.760895	0.316686	0.609666	0.630363	0.600554	1.24069
MIR4715	0	0	0	0	0	0	0	0	0	0	0	0	0	0	0	0	0	0	0	0	0	0	0	0	0	0	0	0	0	0	0	0	0	0	0	0	0	0	0	0	0	0	0	0	0	0	0	0	0
RIPK1	6.1351	7.54707	8.18928	5.09283	7.15398	7.6221	4.25549	5.32721	5.11665	6.6615	8.86338	8.44778	6.09769	5.68502	8.1354	4.79588	4.91254	8.95766	8.53088	5.41659	3.87505	8.40112	6.33636	6.00653	6.29512	5.51537	6.83304	7.76458	6.23087	8.93278	6.33894	9.34374	6.35211	7.17944	4.06991	8.56836	6.90684	6.26151	4.15783	10.3453	5.17523	7.70308	5.04333	7.44061	9.87525	4.46792	8.31159	4.9166	10.1277
PRDX1	117.497	119.619	118.931	125.986	96.804	94.0318	106.337	133.536	136.482	78.9649	135.011	100.725	132.571	115.936	153.104	118.303	129.492	83.9716	129.412	125.418	180.504	106.498	113.206	109.025	98.8222	120.775	167.475	108.228	143.694	130.523	122.729	123.841	118.443	154.366	121.365	93.9319	133.933	129.125	106.122	205.397	118.05	87.8329	98.6376	123.341	109.334	134.178	156.779	121.68	209.563
MIR30B	0	0	0	0	0	0	0	0	0	0	0	0	0	0	0	0	0	0	0	0	0	0	0	0	0	0	0	0	0	0	0	0	0	0	0	0	0	0	0	0	0	0	0	0	0	0	0	0	0
AKR1C1	32.7239	28.7305	14.2833	33.2463	31.5196	15.9598	28.5078	26.763	30.6138	17.1988	21.5407	20.0058	30.2544	29.1586	31.5507	30.5453	23.5934	25.1715	19.0424	25.2543	64.2506	32.7714	17.6113	19.5178	24.8118	26.4156	46.5597	19.4156	36.742	18.3585	28.3227	23.6986	21.4925	43.9136	27.1314	24.6818	32.9489	51.9132	11.8428	58.5897	15.8694	25.5858	21.4596	26.2131	25.3007	23.9861	18.9998	16.362	33.3859
AKR1C2	12.6322	7.404	16.6947	14.6167	15.1392	8.127	9.53039	10.2691	10.9362	2.93893	22.9211	10.9398	17.3191	19.0374	52.111	24.0292	9.70845	3.94218	14.8708	11.0386	44.5541	23.1622	8.93103	22.9407	11.459	7.98266	49.5895	18.2814	16.8359	3.10557	28.4661	5.71898	9.96199	14.8243	23.5038	9.55003	6.43871	20.4536	5.42504	65.2356	17.4668	9.86174	5.50394	11.11	10.7209	24.9538	1.80808	9.75094	19.8959
AKR1C3	9.04774	16.2436	15.99	14.2358	12.4306	15.9318	19.1368	12.0311	12.3633	9.54237	15.0282	17.6245	15.5718	15.6379	36.9609	28.0481	18.3818	11.0991	19.4693	11.6613	23.0444	16.2342	10.4766	15.4743	13.4403	12.4064	29.7224	15.6945	18.2602	13.9743	11.3757	25.5934	11.7752	18.4823	15.021	20.631	17.5305	23.7796	16.8464	46.8381	10.9992	19.7967	9.8993	17.6718	33.2754	17.3575	10.1695	9.04883	30.8556
RB1	2.71	2.54355	2.97519	1.51522	1.40229	2.51974	1.50687	1.64773	1.78126	2.69372	3.03214	2.95995	2.74098	2.62602	4.63134	1.8215	1.46777	3.74999	3.03397	1.66919	0.88088	2.47967	2.3144	1.75385	2.37462	1.19471	2.46421	2.77324	2.68108	4.03069	2.6287	2.37015	1.80197	2.94518	0.977528	2.4177	2.23398	2.44854	2.51742	3.03791	2.87315	2.82162	2.33025	3.30055	2.57931	1.75846	3.77562	1.16012	3.82636
HSF1	7.19895	7.20497	6.49081	6.32405	6.94578	5.56976	6.17434	5.76344	6.03136	4.93652	5.94825	6.51957	6.14142	7.26681	5.82453	5.37816	6.06134	4.82282	6.55968	5.87373	7.80222	6.66589	6.12632	7.18658	5.8454	6.19544	6.09739	6.18002	5.88091	7.05687	5.97814	8.47107	5.67046	5.79233	5.14145	5.7603	11.0566	8.3347	4.61193	11.488	6.06505	6.11511	6.0259	6.9286	6.81072	5.23526	6.02624	5.39091	7.06729
GCLC	15.067	8.71451	14.8497	9.30017	12.8601	8.95719	10.7889	7.85932	9.69855	10.5637	12.6031	17.2465	13.1677	9.2281	13.2217	9.83944	11.0439	10.7064	13.1247	11.0305	5.26857	19.4453	7.8943	11.7732	17.2447	10.7703	13.2595	8.96303	12.3658	7.31372	11.2881	10.2646	8.85548	11.5377	8.33664	15.1074	9.28253	13.8308	6.76058	13.6883	13.0979	15.6545	8.19777	15.5914	9.60894	10.9503	11.6611	6.92523	8.66896
SQSTM1	25.3999	31.3375	42.701	23.9547	42.9676	30.7089	22.5532	20.1516	27.793	18.259	34.4763	25.651	34.8261	20.2979	28.4183	21.0961	19.7555	30.3713	30.9704	22.0206	22.3824	58.8986	19.7992	34.7632	21.6927	29.0398	27.66	22.8153	35.9927	43.8821	18.8004	46.7614	24.2496	40.1433	18.6183	38.9754	38.891	34.3131	14.6614	74.2531	20.6085	22.6352	25.7364	23.8227	32.9083	26.787	25.687	20.0677	43.566
NQO1	0.258133	0.631205	0.95495	0.726958	0.509311	0.329633	0.246763	0.209385	0.399614	0.262472	0.650446	0.163943	0.85321	2.23273	6.01543	0.582402	0.241564	0.0691483	0.253887	0.896185	6.48727	0.578687	0.202692	2.36022	0.662039	0.291469	3.87047	1.33326	0.994385	0.492998	0.434485	0.896475	0.781525	1.77371	0.507345	0.287725	0.433014	0.987185	0.970867	1.47474	0.380744	1.96798	0.681643	0.750155	0.125382	0.708005	0.843286	1.99944	22.3378
MUC1	0.0516982	0.0556951	0.465958	0.121573	0.0347485	0.0260946	0.111303	0.772967	0.0272642	0.059043	0.475553	0.242347	0.0187846	0.506711	0.127374	0.18668	0.0480697	0.0775151	0.0483153	0.0244497	0.29047	0.336408	0.0164501	2.85626	1.10439	0.263902	3.49912	0.075199	0.0437273	0.129559	0.122888	0.470461	0.906721	0.184375	0.0388877	0.466211	0.466483	0.554751	0.186824	0.0847788	0.576232	4.58788	0.517846	0.0616061	0.0432471	0.0355798	0.148897	0.0410063	5.60319
MT1G	1765.91	954.653	752.178	1700.82	1645.69	2521.48	752.318	479.761	167.358	1240.18	241.83	1307.89	676.148	1353.26	144.64	1604.19	1709.11	864.464	77.601	1279.83	2760.92	1166.19	477.365	1180.99	384.688	1487.39	1732.53	1914.33	170.922	371.745	520.642	558.466	524.928	179.548	2590.14	2360.15	1416.54	2821.26	2616.28	1091.56	3052.01	1217.61	514.629	903.017	2535.76	623.311	1329.3	1188.93	3.05689
CISD1	8.29845	6.58727	7.28193	5.15351	5.18251	5.69311	5.48052	5.96846	6.95218	3.93177	6.17358	5.23894	6.15109	5.80306	7.98028	5.45405	5.05288	4.53837	7.50836	7.96389	8.73804	5.08025	4.73936	5.66416	6.63549	5.06946	4.42302	4.81343	9.60647	7.50009	6.39853	6.13254	4.5248	6.68041	4.79129	5.41859	8.37737	9.6455	5.17387	11.2996	5.08877	7.24066	5.8178	7.14708	5.38763	7.91435	6.96338	7.63809	7.25052
FANCD2	0.129366	0.054163	0.108556	0.0855604	0.0391284	0.10704	0.0534505	0.153858	0.0767518	0.0975115	0.123077	0.10188	0.0881344	0.106417	0.479354	0.0708315	0.0721715	0.1175	0.244823	0.0825944	0.072069	0.136372	0.129665	0.120443	0.12623	0.0636783	0.0953669	0.201923	0.193878	0.200598	0.24638	0.0961258	0.0988814	0.252913	0.0136842	0.0623731	0.112889	0.112011	0.192511	0.134518	0.107138	0.0766431	0.10724	0.124868	0.0597659	0.136583	0.395766	0.100745	0.314123
FTMT	0	0	0	0	0	0	0	0	0	0	0	0	0	0	0	0	0	0	0	0	0	0	0	0	0	0	0	0	0	0	0	0	0	0	0	0	0	0	0	0	0	0	0	0	0	0	0	0	0
HSPA5	73.7988	120.919	132.795	49.422	92.1555	100.163	43.4169	52.4495	96.7685	151.007	51.2432	102.31	120.232	131.903	126.712	217.458	117.917	253.912	91.4266	130.443	91.2514	106.406	127.403	35.7712	124.416	115	132.682	146.859	83.4606	114.313	161.825	130.849	64.1273	87.6254	81.8421	110.544	101.764	97.751	128.594	106.059	83.472	121.397	93.6419	147.112	143.355	47.3413	116.379	121.47	134.994
HELLS	0.0720912	0.0400091	0.107049	0.0579224	0.0233304	0.0554482	0.0273897	0.103432	0.0281622	0.0329333	0.0534791	0.0300395	0.0829488	0.114026	0.523507	0.0358409	0.0327709	0.0637465	0.174049	0.0698119	0.0251726	0.110501	0.122342	0.0939113	0.0501766	0.040889	0.0704455	0.0806632	0.167684	0.124207	0.284212	0.105813	0.0398681	0.140239	0.0451895	0.036475	0.0437466	0.0711337	0.131079	0.0626929	0.0797305	0.0478839	0.0940688	0.0668168	0.0383768	0.165382	0.154516	0.136889	0.251379
SCD	55.8487	21.1304	213.981	449.747	131.591	38.9065	83.1293	476.313	234.473	70.5251	156.55	74.9281	688.895	137.591	432.097	134.831	167.134	107.256	455.982	194.131	119.57	221.66	241.02	210.336	185.138	169.04	247.57	133.136	516.861	116.446	190.417	48.7431	115.57	483.874	88.6933	102.151	29.8237	216.321	29.0684	95.0395	134.387	66.0519	230.39	72.7447	35.1811	161.966	67.607	295.351	132.016
FADS2	0.388274	0.803611	8.69764	9.5568	9.33398	0.398694	3.7967	39.7101	18.8993	1.39935	7.08612	6.12252	22.141	6.80431	25.8089	14.8059	11.571	1.77414	31.4385	8.52919	2.73594	18.7611	15.69	9.67882	11.6927	11.8042	15.9973	1.58874	29.0377	4.72682	7.61146	1.11833	7.58854	13.2772	5.02004	6.75557	0.985569	1.76931	1.02696	2.16295	8.74731	3.78695	17.8962	5.5083	3.9038	7.66739	3.03978	6.90866	4.05908
SRC	0.779188	1.46223	0.954997	0.866662	0.633537	1.15813	0.780678	0.831332	0.680452	1.21139	1.60261	1.76033	1.03886	1.528	1.94828	1.12169	0.638026	1.12626	2.03044	0.894085	1.04481	2.19822	1.16969	2.70417	0.620715	0.717903	1.37832	1.28244	1.26362	3.25679	1.5301	2.00326	0.988905	2.47899	0.382862	1.0402	1.83229	1.85544	1.23394	1.7368	1.12975	1.81916	2.32237	1.35084	0.811422	1.67717	4.85868	0.573635	3.44478
STAT3	21.0781	20.113	22.4066	17.5724	27.1817	34.3319	7.93813	9.53746	12.8073	30.0293	23.8999	29.6278	22.7232	11.1445	18.5043	25.5273	8.88933	48.3445	15.2267	9.19322	10.8235	23.8398	20.8913	15.4399	25.3827	21.1404	26.8741	34.1752	13.4312	16.7463	15.2275	27.6612	16.1721	17.783	11.4464	24.5359	11.4163	18.8535	21.973	25.2362	17.7497	30.0789	18.0498	16.5788	47.7939	10.489	18.7933	12.4898	17.7946
PML	0.800645	1.14915	0.89521	0.822335	1.1914	1.25035	0.732006	0.903488	0.845605	1.13394	1.24346	1.43786	1.50513	1.86593	3.24043	1.16154	1.24566	1.73107	3.58546	1.26005	1.26417	1.05814	1.62768	1.69488	1.31831	0.839884	1.73264	2.25494	1.46768	1.89967	1.54707	1.37295	1.15531	1.73281	0.811588	1.15258	1.57073	1.26043	0.881486	2.36103	1.13668	1.51099	1.57276	2.64338	1.50184	1.0861	2.39256	0.865527	4.04882
MTOR	2.13519	1.35585	2.80173	2.07731	1.53733	3.95383	1.63349	2.03002	2.66948	4.11972	3.37801	3.45489	3.54724	2.9427	5.78746	2.69001	3.01977	4.42349	5.86965	1.92095	1.58856	3.22631	3.76483	1.80559	2.73266	2.25977	2.59029	4.26655	4.7719	4.1382	3.9863	1.67314	2.67231	4.23012	0.834372	1.56846	2.15012	2.19347	2.24735	3.71376	1.74315	2.25255	4.36709	3.20513	1.48741	3.26195	3.26835	2.07778	4.78411
NFS1	3.9312	3.12018	4.12041	4.01013	4.39581	5.86134	4.41154	4.28878	3.43479	4.47841	4.26429	4.33679	4.53036	4.5125	6.31763	4.37895	5.27214	4.3912	5.30128	4.24745	4.1519	4.299	5.73849	3.52078	3.7127	4.85778	5.30883	3.97237	5.36926	4.35598	5.28068	3.55018	4.45505	4.85878	3.11355	3.11927	3.12404	4.35588	3.96087	3.8654	5.05565	3.72499	4.25533	5.99458	3.73119	4.81476	3.11543	3.42402	4.47326
TP63	0.0218103	0.0160203	0.0389764	0.00384666	0.00732979	0.018872	0.0227876	0.00988171	0.00191702	0.0348724	0.0485382	0.0163585	0.0990595	0.0483526	0.0424233	0.00770437	0.0506987	0.0320729	0.0152873	0.00663092	0.0155774	0.0368999	0.0312296	0.0225622	0.0394103	0.0344605	0.0423113	0.040266	0.0588014	0.0640523	0.0208639	0.0240092	0.0465232	0.0593984	0.00922826	0.0204473	0.0051789	0.0242107	0.013384	0.0146316	0.0712336	0.0279385	0.0188334	0.0597773	0.00746383	0.184217	0.0394427	0.0117952	0.0259923
CDKN1A	37.614	128.17	49.2596	9.22706	110.712	29.5181	24.3725	24.923	42.5639	25.9391	26.6074	91.597	33.5592	15.0512	44.7637	42.5598	6.28938	78.3334	44.0395	15.9084	28.6364	81.6484	31.2798	64.2019	46.9638	39.7062	63.0157	24.8523	31.7719	103.974	25.5599	78.2106	15.1663	75.1026	29.2516	60.8228	28.4337	135.592	27.0944	9.3211	27.5726	139.439	34.9717	52.6693	182.977	17.7585	48.9206	9.54737	68.6371
ENPP2	1.93684	2.49869	3.17061	1.65544	2.41962	2.00169	5.07379	4.70421	2.72029	2.92482	2.42762	12.9769	2.94961	2.31445	22.2423	2.15922	7.13021	2.12335	15.8802	0.976931	0.907655	2.58459	1.38954	3.51847	3.09961	0.38467	1.71544	4.11576	2.19358	2.90057	2.22924	6.27933	2.88887	6.19208	0.419124	2.15178	1.01256	0.85285	3.49647	1.91796	5.53111	2.18188	6.42983	15.5151	4.00723	3.77521	4.0294	2.81703	10.7925
FH	65.1332	63.5766	88.0388	74.7211	69.4474	65.0083	97.6026	59.6883	66.3307	45.7936	64.6247	102.681	76.8932	77.1266	83.3887	67.4109	66.5414	63.9008	84.9051	68.3254	84.7494	61.8535	56.8017	65.2806	74.04	67.2567	60.5844	66.3034	87.9645	58.0602	84.3008	61.2842	64.0124	66.403	49.2731	54.9012	90.8407	84.8158	72.4944	78.8619	68.0687	71.403	57.3332	79.0479	68.6222	91.6505	53.5914	53.4833	63.4817
CISD2	14.2701	12.734	12.6366	11.2239	8.80216	12.3904	8.45235	9.98074	9.95934	9.53636	9.09714	10.6466	11.8052	13.4758	13.2639	13.6944	11.7185	11.9754	10.5122	14.8767	14.9652	8.09143	11.9652	11.4112	9.12732	11.0051	14.3479	9.37782	13.5045	12.0506	11.291	13.6335	6.8875	10.8936	13.2456	9.93042	11.3204	12.7995	14.529	11.679	10.8286	12.3552	10.9205	13.6436	10.3005	10.1481	11.24	12.4378	14.0523
MIR9-1	0	0	0	0	0	0	0	0	0	0	0	0	0	0	0	0	0	0	0	0	0	0	0	0	0	0	0	0	0	0	0	0	0	0	0	0	0	0	0	0	0	0	0	0.17938	0	0	0	0	0
ISCU	11.4023	11.6591	8.99503	9.78266	8.13574	8.34241	10.6933	8.69911	9.45765	9.40274	10.5754	7.89055	9.74761	10.8501	13.2573	9.6598	9.84485	7.3404	11.7507	10.9602	12.472	8.99887	8.08465	12.01	9.78112	9.43222	10.4727	10.5541	14.9736	14.9375	9.36066	12.3167	10.0213	13.5329	12.4124	9.70705	14.4404	13.4974	9.35688	14.3322	9.8968	8.32734	10.0188	12.1327	8.07146	12.1467	15.2371	10.5014	14.6907
ACSL3	7.03588	6.55135	7.33478	6.16628	7.04586	7.58979	3.66633	4.47647	5.79869	7.732	6.8163	11.2336	7.44101	4.52752	7.97109	6.36418	4.85017	21.3335	7.42102	4.60589	4.43287	7.79391	7.4112	5.30397	9.29172	6.28799	10.722	6.85157	5.91863	5.80057	5.88568	9.39319	4.37472	6.99123	3.19235	7.744	4.60149	10.4117	5.49806	9.17906	10.3146	8.66287	4.75831	8.53324	8.98056	3.44975	6.1003	5.36028	7.54871
OTUB1	5.69739	8.32505	5.32872	5.60187	5.46772	5.20007	5.37102	5.17306	5.69062	5.33073	5.75659	5.03307	6.2741	6.55542	7.26554	5.63593	6.36551	4.56996	7.50637	4.89699	8.42133	6.00318	5.32958	6.24401	5.48698	5.8211	4.957	6.16178	5.95283	8.42867	5.17462	8.22715	5.08362	6.16387	6.162	4.61094	8.20396	6.33796	4.6336	10.625	5.30947	4.92079	5.5038	7.0761	6.06471	4.94947	8.08111	5.66149	8.6386
CD44	1.76201	2.70961	1.99581	0.764081	1.03945	3.03179	1.11625	0.778183	1.19636	2.65297	2.59562	3.70858	2.16297	2.24835	4.75105	1.20677	0.759047	4.15864	2.38792	1.28764	2.61624	3.50492	1.50839	3.3092	1.7117	0.310425	1.63909	3.61385	2.00094	8.81306	1.78256	2.27955	1.79114	4.75152	0.227992	2.59584	1.91923	1.81776	1.56073	2.12193	2.137	3.34769	1.86211	4.10115	1.88826	1.43212	12.0801	0.412636	3.11609
LINC00336	0	0.0113351	0.0119903	0	0	0.00834552	0	0	0	0	0.00858576	0	0	0	0	0	0	0	0	0	0.0220435	0	0	0	0	0	0	0.01295	0	0	0	0	0	0	0	0	0	0.00856508	0	0	0	0	0	0	0.00880168	0.00724124	0.00775209	0	0
BRD4	3.68803	3.60033	3.51178	2.87726	4.81469	4.01904	2.86794	3.88605	3.00371	4.59839	5.34642	4.90926	3.94565	4.32629	3.91062	2.83509	4.29877	4.4737	4.59604	4.19213	2.35244	5.22428	4.56857	3.94962	3.98391	3.77928	4.90135	4.28926	3.06587	4.38556	3.99137	5.68284	4.13737	3.2899	3.90969	5.14222	4.9607	4.25908	3.06616	5.78104	4.02069	5.90968	4.11412	4.84927	4.97942	3.21093	4.337	3.25424	3.22163
PRDX6	228.567	216.511	149.195	147.895	196.178	169.756	229.244	148.39	191.679	127.805	149.88	204.953	121.518	195.329	144.925	106.826	199.239	86.5111	165.006	197.234	242.216	143.501	127.588	179.12	193.948	143.707	171.494	153.685	146.293	121.235	166.821	184.643	165.521	130.757	200.976	176.174	263.106	230.054	204.326	215.517	160.039	180.29	139.47	160.771	210.257	180.284	178.235	141.082	109.936
NF2	1.37179	1.75209	1.42349	1.91353	0.998235	1.05455	1.39772	1.24305	1.77971	2.90547	2.04366	1.75166	1.28729	1.14029	1.89646	1.19609	1.29026	1.50829	1.7204	1.24084	1.90771	2.4994	1.20126	1.08679	1.12808	1.58459	1.17886	2.02835	1.36645	2.08025	1.29945	1.35784	1.76805	1.85033	1.02653	1.02035	2.5951	1.27862	1.28242	2.69238	0.828712	1.21506	2.22421	1.21588	0.869061	1.14696	2.40335	1.5843	1.85775
ARNTL	3.98418	1.31027	1.13434	1.13822	1.07225	0.888874	5.83597	1.45926	1.60826	0.852992	2.08443	2.36584	0.265671	0.533041	0.618247	1.12705	0.649512	1.41132	3.52816	0.624633	0.7665	0.622844	2.46306	0.864035	2.80691	2.20329	2.39144	3.42795	0.415912	1.51908	0.767235	0.295348	3.84686	1.85257	0.906803	1.95851	1.86245	0.772737	1.728	1.91611	0.721771	1.62811	0.684596	1.89813	1.24627	0.276745	1.77761	1.22614	0.446487
JUN	14.1754	159.551	121.397	15.9402	121.568	57.9726	50.6086	99.4386	70.2728	185.372	53.2689	103.362	111.972	13.0804	32.797	17.4827	50.6098	58.1312	27.6429	86.0921	40.9943	119.076	39.6525	69.3565	37.2212	66.835	38.987	18.0209	69.3839	216.404	24.4382	103.855	58.1674	113.097	104.023	67.1532	63.2432	91.2119	82.9302	77.7775	113.341	101.029	42.8052	129.646	97.7654	30.8895	71.6327	52.5391	50.2519
CA9	0.438073	0.829471	0.86985	0.403482	0.38169	0.926583	0.342121	0.551334	0.333707	0.411366	0.303308	0.337697	0.344877	0.726974	0.75742	0.722153	0.570256	0.185261	0.818814	1.03589	1.6548	0.39275	0.185857	1.19728	0.281451	0.272132	1.34717	0.800598	0.73334	1.71537	0.364036	1.58604	0.403774	0.35981	1.35927	0.612785	1.43318	1.24273	0.477913	1.4912	0.529915	1.2886	0.285811	0.788843	0.277622	0.557302	0.577057	0.305355	1.85625
TMBIM4	11.1474	9.61211	10.5219	9.05171	7.6555	6.52866	8.00265	6.2005	6.9565	10.4661	7.6786	7.25074	6.22553	7.89134	7.22719	5.6452	10.8814	7.34596	8.46993	8.98453	11.7883	7.3697	6.58349	7.02833	7.33287	6.07055	7.52196	5.03898	11.567	9.61585	4.36413	10.7587	7.25552	11.3827	7.72065	7.92096	6.6672	6.21621	9.54959	9.11284	10.2495	9.41765	9.42679	6.95875	10.2251	9.66627	7.77793	8.53496	10.791
PLIN2	194.24	476.99	370.252	52.7006	145.765	127.597	48.9057	31.409	37.3055	184.189	75.9852	170.177	73.4499	107.741	74.8092	89.2515	107.648	262.915	45.2748	132.631	137.616	172.366	103.829	84.9931	80.6129	245.734	145.701	61.2345	129.362	191.808	138.368	243.999	69.5629	110.353	88.9576	40.0878	51.2297	275.419	60.1541	143.046	101.953	111.948	79.7422	127.117	83.1869	34.2524	72.6664	78.1437	193.715
MIR212	0	0	0	0	0	0	0	0	0	0	0	0	0	0	0	0	0	0	0	0	0	0	0	0	0	0	0	0	0	0	0	0	0	0	0	0	0	0	0	0	0	0	0	0	0	0	0	0	0
AIFM2	3.53008	1.93018	4.70338	4.8719	2.28759	2.46553	2.23431	2.92266	2.61858	2.91432	3.18824	1.62067	3.90261	2.94055	4.22144	3.20973	2.87313	2.29226	4.53809	3.5486	4.85261	4.20684	3.42265	3.13322	2.13578	3.05911	4.0332	3.02879	4.94064	3.85676	3.02862	4.01843	3.50799	5.39203	3.37574	1.85721	5.25488	4.40007	1.93635	10.0214	3.05039	1.63913	2.5589	4.19529	2.09468	3.12277	2.59557	2.89703	7.09964
LAMP2	36.1961	39.5112	44.538	32.0119	28.8737	44.4978	29.6035	26.7987	32.556	31.9094	52.4111	43.5443	40.9548	35.5086	66.8097	25.7073	30.2709	37.8832	51.3308	33.8695	25.1014	32.4183	28.8419	32.5881	35.0327	26.7746	34.4192	33.364	40.8156	70.0703	26.8307	38.2252	28.8011	57.2788	22.0412	29.5632	37.4194	39.8685	31.979	35.4665	39.1897	30.2714	40.347	48.7166	28.4419	28.3693	40.1897	29.0525	97.1158
ZFP36	56.8469	502.792	141.098	63.5442	172.679	83.0648	114.13	137.468	162.118	148.518	58.8066	92.4607	175.59	57.9466	94.9927	101.942	64.7896	316.054	81.1834	141.895	100.263	274.673	92.7861	402.104	218.886	171.236	122.118	38.0099	67.9394	532.288	48.4354	339.009	102.511	187.471	76.613	149.792	174.129	316.92	245.903	59.8948	209.893	307.278	64.0039	283.136	306.447	47.7151	142.834	153.35	118.055
PROM2	0.0536281	0.0472698	0.108338	0.0614793	0.114145	0.113109	0.112062	0.255125	0.0824892	0.165367	0.176038	0.103072	0.204601	0.125149	0.151253	0.192596	0.122167	0.0185559	0.169151	0.119566	0.15321	0.216359	0.102385	0.246564	0.184118	0.0847332	0.523653	0.144011	0.161594	0.185844	0.163231	0.531316	0.162057	0.164308	0.189091	0.143648	0.206929	0.187521	0.109697	0.149904	0.277325	0.56961	0.203757	0.124616	0.0917622	0.135889	0.180497	0.107309	0.684382
CHMP5	14.7269	14.2199	15.137	13.6227	8.86982	9.85882	13.9104	9.31515	8.73512	11.0237	13.0719	10.7268	13.9275	13.4533	19.152	12.9194	12.3397	11.4681	15.1856	13.4631	11.3005	9.78218	10.3081	12.8695	10.2674	10.7642	9.9851	12.0103	16.7911	17.196	10.7012	14.6691	11.4063	15.1776	8.5001	9.87548	13.9312	12.0135	13.2184	16.5117	13.3669	10.587	9.68003	13.8935	13.1989	14.6891	14.7345	10.6167	25.2046
CHMP6	8.14916	8.38951	6.62003	5.94985	5.97611	6.99044	5.46072	6.7294	6.98957	6.28545	5.09908	5.41171	7.61399	7.6487	6.71115	7.76377	6.90155	5.67036	8.33923	6.26198	12.0829	7.46218	7.4188	7.86104	6.87947	7.76185	7.22703	7.12416	6.40307	10.4596	7.02234	8.04413	6.22181	7.7869	8.26013	5.66438	10.7445	8.86142	4.85161	13.7231	5.49742	5.32598	7.11862	7.70166	7.42506	5.74129	7.41106	5.86971	8.36245
CAV1	2.42281	7.10875	6.44893	2.05108	4.33663	2.14523	4.20277	3.4375	2.82149	7.16847	7.51616	3.81611	3.6612	4.15916	3.74556	3.38586	3.72538	2.85257	3.75465	2.79303	2.66249	5.03289	2.06249	4.66476	3.55511	2.34767	3.89922	2.81413	3.45496	7.59328	3.18299	5.98888	2.59583	6.02758	1.83119	7.71298	4.26511	3.59429	2.53769	6.31442	5.03585	9.16191	3.31529	4.26188	5.18374	2.69862	7.69466	3.16189	3.49649
GCH1	49.5911	32.3324	20.3067	17.3777	28.1852	27.1834	16.5667	11.5317	13.4324	15.8364	22.7124	44.8532	25.6172	23.4113	19.6581	20.5245	17.6827	37.0328	15.079	24.4259	12.6463	25.0151	16.7628	26.6588	22.5375	25.7117	32.1623	20.8503	18.1204	12.8527	20.8886	34.8469	16.3214	15.5448	11.1577	27.6687	20.4987	30.5527	28.1048	12.3564	27.5894	34.2032	16.964	17.5349	52.3613	25.334	18.8078	14.1818	19.1219
[truncated: 375 more columns]

## Sheet: Supplementary Table 3
Supplementary Table 3. 84 ferroptosis-related differentially expressed genes.
gene	conMean	treatMean	logFC	pValue	fdr
RPL8	211.681	704.837	1.7354	4.54367e-21	3.27144e-20
CS	5.37879	13.8183	1.36123	1.45074e-22	1.20523e-21
EMC2	4.26184	9.93217	1.22063	4.52047e-24	5.74366e-23
NOX1	0.146418	0.415607	1.50512	9.69614e-15	3.17328e-14
NOX4	0.0216366	0.24261	3.4871	1.94152e-28	2.09684e-26
NOX5	0.00304716	0.0127574	2.0658	2.61673e-05	3.84499e-05
DUOX1	0.0569322	0.494106	3.1175	5.88354e-20	3.53012e-19
G6PD	1.31171	13.5821	3.37219	6.02671e-25	1.0812e-23
ACSL4	7.32149	46.1219	2.65524	3.57418e-12	9.08263e-12
NRAS	5.76946	11.9025	1.04476	7.64046e-17	3.17373e-16
HRAS	4.52107	13.5674	1.5854	7.5853e-25	1.1703e-23
TFRC	3.67961	10.991	1.5787	1.93422e-16	7.46058e-16
SLC38A1	1.29373	4.37665	1.75829	2.99873e-05	4.34715e-05
SLC1A5	2.72912	8.79615	1.68844	0.00412299	0.00505103
GLS2	4.77871	1.7868	-1.41924	1.24398e-15	4.63275e-15
ALOX12	0.109011	0.275266	1.33635	1.04005e-12	2.80812e-12
ALOX15	0.0219052	0.096189	2.1346	8.16438e-06	1.23322e-05
ALOX15B	0.142067	1.81789	3.67762	7.72369e-07	1.25437e-06
MAPK3	3.65701	9.50819	1.37851	5.73089e-26	1.76839e-24
CDKN2A	0.162719	4.09759	4.65432	1.87e-25	4.48801e-24
MYB	0.0463979	0.13344	1.52406	7.28782e-08	1.2903e-07
PRKAA2	0.279372	1.62845	2.54324	2.29901e-10	4.96585e-10
BAP1	7.27858	15.1878	1.06118	1.67524e-23	1.7231e-22
ABCC1	0.707154	2.38037	1.75109	3.82189e-06	5.93905e-06
ATF3	20.5744	9.02973	-1.1881	1.06808e-11	2.62166e-11
YY1AP1	3.83637	9.08909	1.24439	1.04477e-23	1.18773e-22
EGLN2	1.59681	3.78929	1.24673	1.96154e-20	1.21055e-19
MIOX	0.0253075	0.730526	4.8513	1.25034e-11	3.03452e-11
TAZ	1.72355	5.52082	1.6795	7.51676e-29	1.62362e-26
DNAJB6	1.46502	3.29309	1.16853	2.67946e-26	1.14432e-24
PTGS2	0.685695	0.20982	-1.70841	5.30649e-17	2.2924e-16
DUSP1	210.261	101.366	-1.05261	6.88476e-14	2.06543e-13
NOS2	0.0972624	0.402505	2.04905	5.20947e-13	1.5206e-12
NCF2	1.94716	4.04533	1.05489	0.0117892	0.0139151
MT3	0.0171549	0.505604	4.88132	0.000988025	0.00127792
ALB	34010.4	14088.9	-1.27141	6.52587e-21	4.40496e-20
TXNRD1	6.76314	28.1066	2.05514	1.93464e-17	8.70589e-17
SRXN1	0.361867	1.48891	2.04073	5.05613e-15	1.73353e-14
GPX2	106.985	267.704	1.32323	0.0100979	0.0121852
SLC7A11	0.0301082	0.889909	4.88543	1.65466e-19	8.93515e-19
DDIT4	14.4734	30.4161	1.07143	6.49238e-05	9.22602e-05
ASNS	0.500574	2.5703	2.36028	2.42608e-09	4.8975e-09
DDIT3	9.15751	26.0193	1.50655	3.17612e-17	1.40008e-16
SLC1A4	1.91272	5.00649	1.38818	6.02663e-15	2.03399e-14
SLC7A5	2.46272	5.03757	1.03248	0.0263492	0.0305991
ZNF419	0.285625	0.643774	1.17243	9.42743e-13	2.57763e-12
ZFP69B	0.135104	0.407536	1.59286	8.38869e-17	3.41879e-16
TUBE1	3.04622	1.32905	-1.19662	8.3329e-21	5.45426e-20
IL6	0.867032	0.320722	-1.43476	3.10172e-05	4.46648e-05
FTL	6020.63	12148.8	1.01283	7.27629e-07	1.19066e-06
MAFG	1.05616	4.15899	1.97741	7.4264e-23	6.41641e-22
FTH1	139.099	286.486	1.04235	8.92719e-17	3.54248e-16
HAMP	148.253	15.9674	-3.21486	6.50719e-25	1.0812e-23
HSPB1	71.3546	339.067	2.24849	7.64893e-24	9.17871e-23
STEAP3	47.6772	21.8395	-1.12636	2.10621e-19	1.10961e-18
DRD4	0.155276	1.07583	2.79255	1.0577e-14	3.31107e-14
SLC2A1	0.680047	2.53401	1.89771	3.92036e-05	5.60793e-05
SLC2A6	0.920582	3.11068	1.75661	9.56692e-08	1.68005e-07
SLC2A14	0.0452823	0.17522	1.95215	0.00358376	0.00442338
NNMT	469.383	140.667	-1.73849	1.1498e-17	5.28417e-17
STMN1	1.90256	13.5199	2.82907	1.89929e-27	1.02562e-25
RRM2	0.469399	6.3783	3.76429	3.17866e-26	1.14432e-24
CAPG	3.48688	13.1953	1.92002	1.94929e-11	4.52738e-11
AURKA	0.65543	6.89275	3.39456	4.05978e-28	2.92304e-26
AKR1C1	27.5296	64.1935	1.22145	0.000384398	0.000512531
AKR1C2	16.2497	50.1002	1.62441	5.01125e-06	7.67681e-06
AKR1C3	17.683	83.414	2.23793	1.18324e-23	1.2779e-22
HSF1	6.46639	17.7451	1.45639	3.17318e-25	6.23097e-24
SQSTM1	29.9868	99.9176	1.73641	9.02019e-17	3.54248e-16
NQO1	1.45967	57.9538	5.31119	6.81872e-16	2.58394e-15
MT1G	1204.51	315.605	-1.93225	3.78444e-23	3.406e-22
FANCD2	0.131555	1.01643	2.94977	2.64972e-25	5.72339e-24
HSPA5	110.195	231.575	1.07142	1.03689e-19	5.89388e-19
HELLS	0.0938035	0.861082	3.19844	3.83929e-24	5.18304e-23
FADS2	9.64211	20.0576	1.05673	0.0111863	0.0132761
SRC	1.47643	5.36864	1.86244	2.15681e-10	4.70577e-10
PML	1.50235	3.13655	1.06196	9.28832e-18	4.36147e-17
TP63	0.0324914	0.121942	1.90806	0.00237048	0.00297688
ENPP2	4.15292	9.06023	1.12542	9.15986e-05	0.000128476
NF2	1.55921	3.96433	1.34626	2.04366e-24	2.94288e-23
PLIN2	127.362	62.5749	-1.02528	1.68011e-12	4.4803e-12
AIFM2	3.50635	9.47217	1.43372	4.81735e-21	3.35661e-20
ZFP36	164.714	57.4198	-1.52034	7.99658e-18	3.83836e-17
CAV1	4.22235	8.7237	1.04689	3.25018e-09	6.50037e-09

## Sheet: Supplementary Table 4
Supplementary Table 4. The results of GO analysis based on the ferroptosis-related differentially expressed genes.
ONTOLOGY	ID	Description	GeneRatio	BgRatio	pvalue	p.adjust	qvalue	geneID	Count
BP	GO:0062197	cellular response to chemical stress	26/83	360/18866	7.2139e-25	2.07544e-21	1.42531e-21	NOX1/NOX4/NOX5/G6PD/MAPK3/MYB/PRKAA2/PTGS2/NCF2/MT3/TXNRD1/SRXN1/GPX2/SLC7A11/DDIT3/IL6/HSPB1/SLC2A1/AKR1C3/HSF1/NQO1/FANCD2/SRC/PML/AIFM2/CAV1	26
BP	GO:0006979	response to oxidative stress	25/83	458/18866	6.57684e-21	7.08272e-18	4.86408e-18	NOX1/NOX4/NOX5/DUOX1/G6PD/MAPK3/MYB/PRKAA2/PTGS2/DUSP1/NCF2/MT3/TXNRD1/SRXN1/GPX2/SLC7A11/IL6/HSPB1/AKR1C3/HSF1/NQO1/FANCD2/SRC/PML/AIFM2	25
BP	GO:0034599	cellular response to oxidative stress	22/83	310/18866	7.38552e-21	7.08272e-18	4.86408e-18	NOX1/NOX4/NOX5/G6PD/MAPK3/MYB/PRKAA2/NCF2/MT3/TXNRD1/SRXN1/GPX2/SLC7A11/IL6/HSPB1/AKR1C3/HSF1/NQO1/FANCD2/SRC/PML/AIFM2	22
BP	GO:0031667	response to nutrient levels	18/83	473/18866	1.85037e-12	1.09281e-09	7.50493e-10	G6PD/ACSL4/MAPK3/PRKAA2/ATF3/PTGS2/MT3/ALB/ASNS/DDIT3/HAMP/SLC2A1/AKR1C3/HSF1/NQO1/HSPA5/SRC/ZFP36	18
BP	GO:0072593	reactive oxygen species metabolic process	15/83	288/18866	1.89922e-12	1.09281e-09	7.50493e-10	NOX1/NOX4/NOX5/DUOX1/G6PD/GLS2/ALOX12/PTGS2/NOS2/NCF2/MT3/DDIT4/AKR1C3/NQO1/CAV1	15
BP	GO:0006801	superoxide metabolic process	9/83	74/18866	3.46582e-11	1.66186e-08	1.14129e-08	NOX1/NOX4/NOX5/DUOX1/ALOX12/NOS2/NCF2/MT3/NQO1	9
BP	GO:0046942	carboxylic acid transport	14/83	350/18866	3.67581e-10	1.47765e-07	1.01478e-07	ACSL4/SLC38A1/SLC1A5/GLS2/PRKAA2/ABCC1/NOS2/SLC7A11/SLC1A4/SLC7A5/DRD4/SLC2A1/AKR1C1/PLIN2	14
BP	GO:0015849	organic acid transport	14/83	353/18866	4.10887e-10	1.47765e-07	1.01478e-07	ACSL4/SLC38A1/SLC1A5/GLS2/PRKAA2/ABCC1/NOS2/SLC7A11/SLC1A4/SLC7A5/DRD4/SLC2A1/AKR1C1/PLIN2	14
BP	GO:0010038	response to metal ion	14/83	366/18866	6.57883e-10	2.10303e-07	1.44426e-07	G6PD/ALOX15/MAPK3/PRKAA2/PTGS2/DUSP1/MT3/HAMP/AKR1C3/HSF1/NQO1/MT1G/HSPA5/CAV1	14
BP	GO:0009636	response to toxic substance	12/83	250/18866	9.48828e-10	2.72978e-07	1.87469e-07	DUOX1/MAPK3/PTGS2/MT3/ALB/TXNRD1/SRXN1/GPX2/SLC7A11/ASNS/NQO1/MT1G	12
BP	GO:0042594	response to starvation	11/83	206/18866	1.63557e-09	4.27776e-07	2.93776e-07	MAPK3/PRKAA2/ATF3/ALB/ASNS/DDIT3/HAMP/SLC2A1/AKR1C3/HSPA5/ZFP36	11
BP	GO:0033559	unsaturated fatty acid metabolic process	9/83	118/18866	2.39911e-09	5.75188e-07	3.95012e-07	ALOX12/ALOX15/ALOX15B/MAPK3/PTGS2/AKR1C1/AKR1C2/AKR1C3/FADS2	9
BP	GO:0120254	olefinic compound metabolic process	9/83	121/18866	2.99927e-09	6.63087e-07	4.55377e-07	ALOX12/ALOX15/ALOX15B/MAPK3/PTGS2/AKR1C1/AKR1C2/AKR1C3/FADS2	9
BP	GO:0006690	icosanoid metabolic process	9/83	122/18866	3.2267e-09	6.63087e-07	4.55377e-07	ALOX12/ALOX15/ALOX15B/MAPK3/ABCC1/PTGS2/AKR1C1/AKR1C2/AKR1C3	9
BP	GO:1901568	fatty acid derivative metabolic process	10/83	175/18866	4.94156e-09	9.47791e-07	6.50899e-07	ACSL4/ALOX12/ALOX15/ALOX15B/MAPK3/ABCC1/PTGS2/AKR1C1/AKR1C2/AKR1C3	10
BP	GO:0098754	detoxification	9/83	138/18866	9.5798e-09	1.72257e-06	1.18298e-06	DUOX1/PTGS2/MT3/ALB/TXNRD1/SRXN1/GPX2/NQO1/MT1G	9
BP	GO:0042554	superoxide anion generation	6/83	36/18866	1.05765e-08	1.78992e-06	1.22923e-06	NOX1/NOX4/NOX5/DUOX1/ALOX12/NCF2	6
BP	GO:0071248	cellular response to metal ion	10/83	193/18866	1.26532e-08	2.0224e-06	1.38889e-06	ALOX15/MAPK3/PRKAA2/PTGS2/MT3/AKR1C3/HSF1/NQO1/MT1G/HSPA5	10
BP	GO:0098869	cellular oxidant detoxification	8/83	103/18866	1.68543e-08	2.54109e-06	1.7451e-06	DUOX1/PTGS2/MT3/ALB/TXNRD1/SRXN1/GPX2/NQO1	8
BP	GO:0070482	response to oxygen levels	13/83	396/18866	1.76649e-08	2.54109e-06	1.7451e-06	NOX1/NOX4/MYB/EGLN2/PTGS2/NOS2/MT3/DDIT4/SLC2A1/HSF1/SRC/PML/CAV1	13
BP	GO:0001676	long-chain fatty acid metabolic process	8/83	113/18866	3.50121e-08	4.79666e-06	3.29412e-06	ACSL4/ALOX12/ALOX15/ALOX15B/MAPK3/PTGS2/AKR1C3/FADS2	8
BP	GO:1990748	cellular detoxification	8/83	114/18866	3.75214e-08	4.90677e-06	3.36974e-06	DUOX1/PTGS2/MT3/ALB/TXNRD1/SRXN1/GPX2/NQO1	8
BP	GO:0071241	cellular response to inorganic substance	10/83	221/18866	4.57897e-08	5.7277e-06	3.93351e-06	ALOX15/MAPK3/PRKAA2/PTGS2/MT3/AKR1C3/HSF1/NQO1/MT1G/HSPA5	10
BP	GO:0001666	response to hypoxia	12/83	359/18866	5.40319e-08	6.40984e-06	4.40198e-06	NOX4/MYB/EGLN2/PTGS2/NOS2/MT3/DDIT4/SLC2A1/HSF1/SRC/PML/CAV1	12
BP	GO:0070997	neuron death	12/83	360/18866	5.5699e-08	6.40984e-06	4.40198e-06	G6PD/HRAS/MYB/EGLN2/MT3/SLC7A11/DDIT4/DDIT3/HSF1/NQO1/HSPA5/TP63	12
BP	GO:0036003	positive regulation of transcription from RNA polymerase II promoter in response to stress	5/83	24/18866	5.80607e-08	6.42464e-06	4.41214e-06	ATF3/MT3/DDIT3/HSF1/HSPA5	5
BP	GO:0097237	cellular response to toxic substance	8/83	122/18866	6.38144e-08	6.79977e-06	4.66977e-06	DUOX1/PTGS2/MT3/ALB/TXNRD1/SRXN1/GPX2/NQO1	8
BP	GO:0036293	response to decreased oxygen levels	12/83	371/18866	7.73258e-08	7.94522e-06	5.45641e-06	NOX4/MYB/EGLN2/PTGS2/NOS2/MT3/DDIT4/SLC2A1/HSF1/SRC/PML/CAV1	12
BP	GO:0006631	fatty acid metabolic process	12/83	396/18866	1.56667e-07	1.54192e-05	1.05892e-05	ACSL4/ALOX12/ALOX15/ALOX15B/MAPK3/PRKAA2/PTGS2/AKR1C1/AKR1C2/AKR1C3/FADS2/CAV1	12
BP	GO:0010332	response to gamma radiation	6/83	56/18866	1.64378e-07	1.54192e-05	1.05892e-05	NOX4/HRAS/HSF1/FANCD2/HSPA5/PML	6
BP	GO:0055076	transition metal ion homeostasis	8/83	138/18866	1.66143e-07	1.54192e-05	1.05892e-05	NOX5/TFRC/MT3/FTL/FTH1/HAMP/STEAP3/MT1G	8
BP	GO:0019369	arachidonic acid metabolic process	6/83	58/18866	2.03486e-07	1.82946e-05	1.25639e-05	ALOX12/ALOX15/ALOX15B/MAPK3/PTGS2/AKR1C3	6
BP	GO:0006636	unsaturated fatty acid biosynthetic process	6/83	59/18866	2.2573e-07	1.91008e-05	1.31175e-05	ALOX12/ALOX15/ALOX15B/PTGS2/AKR1C3/FADS2	6
BP	GO:0045454	cell redox homeostasis	6/83	59/18866	2.2573e-07	1.91008e-05	1.31175e-05	EGLN2/NOS2/NCF2/TXNRD1/DDIT3/NQO1	6
BP	GO:0097193	intrinsic apoptotic signaling pathway	10/83	290/18866	5.70589e-07	4.69025e-05	3.22104e-05	NOX1/HRAS/PTGS2/DDIT4/DDIT3/HSPB1/SRC/PML/TP63/CAV1	10
BP	GO:0009267	cellular response to starvation	8/83	163/18866	5.94948e-07	4.73384e-05	3.25098e-05	MAPK3/PRKAA2/ATF3/ALB/ASNS/SLC2A1/AKR1C3/HSPA5	8
BP	GO:0019372	lipoxygenase pathway	4/83	16/18866	6.08801e-07	4.73384e-05	3.25098e-05	ALOX12/ALOX15/ALOX15B/PTGS2	4
BP	GO:0071276	cellular response to cadmium ion	5/83	38/18866	6.53349e-07	4.94654e-05	3.39706e-05	MAPK3/MT3/AKR1C3/HSF1/MT1G	5
BP	GO:0035690	cellular response to drug	6/83	71/18866	6.87994e-07	5.07528e-05	3.48546e-05	TFRC/PRKAA2/NOS2/MT3/HSF1/HSPA5	6
BP	GO:0046916	cellular transition metal ion homeostasis	7/83	116/18866	7.81494e-07	5.6209e-05	3.86017e-05	NOX5/TFRC/MT3/FTL/FTH1/HAMP/MT1G	7
BP	GO:0034614	cellular response to reactive oxygen species	8/83	170/18866	8.18408e-07	5.74283e-05	3.94391e-05	MAPK3/MYB/MT3/IL6/AKR1C3/HSF1/NQO1/SRC	8
BP	GO:0000302	response to reactive oxygen species	9/83	235/18866	9.14296e-07	6.26293e-05	4.30109e-05	MAPK3/MYB/DUSP1/MT3/IL6/AKR1C3/HSF1/NQO1/SRC	9
BP	GO:0051402	neuron apoptotic process	9/83	245/18866	1.29227e-06	8.29338e-05	5.69551e-05	G6PD/HRAS/MYB/EGLN2/MT3/DDIT3/NQO1/HSPA5/TP63	9
BP	GO:0042493	response to drug	11/83	397/18866	1.29524e-06	8.29338e-05	5.69551e-05	TFRC/PRKAA2/ABCC1/PTGS2/NOS2/MT3/NNMT/HSF1/HSPA5/SRC/PLIN2	11
BP	GO:0006826	iron ion transport	6/83	79/18866	1.29842e-06	8.29338e-05	5.69551e-05	NOX5/TFRC/FTL/FTH1/HAMP/STEAP3	6
BP	GO:0071216	cellular response to biotic stimulus	9/83	246/18866	1.33659e-06	8.29338e-05	5.69551e-05	MAPK3/NOS2/DDIT3/IL6/HAMP/HSF1/HSPA5/SRC/ZFP36	9
BP	GO:0007568	aging	10/83	319/18866	1.35484e-06	8.29338e-05	5.69551e-05	NOX4/HRAS/ALOX12/MAPK3/CDKN2A/PTGS2/HAMP/NQO1/PML/TP63	10
BP	GO:1901214	regulation of neuron death	10/83	321/18866	1.43333e-06	8.59099e-05	5.89989e-05	G6PD/HRAS/MYB/EGLN2/MT3/SLC7A11/DDIT4/DDIT3/HSF1/NQO1	10
BP	GO:0000041	transition metal ion transport	7/83	129/18866	1.6001e-06	9.39487e-05	6.45196e-05	NOX5/TFRC/MT3/FTL/FTH1/HAMP/STEAP3	7
BP	GO:0036499	PERK-mediated unfolded protein response	4/83	21/18866	1.96875e-06	0.000108925	7.48044e-05	ATF3/ASNS/DDIT3/HSPA5	4
BP	GO:0043651	linoleic acid metabolic process	4/83	21/18866	1.96875e-06	0.000108925	7.48044e-05	ALOX12/ALOX15/ALOX15B/FADS2	4
BP	GO:0140467	integrated stress response signaling	4/83	21/18866	1.96875e-06	0.000108925	7.48044e-05	ATF3/ASNS/DDIT3/HSPA5	4
BP	GO:0042180	cellular ketone metabolic process	9/83	260/18866	2.11001e-06	0.000114538	7.86591e-05	PRKAA2/PTGS2/SLC7A11/AKR1C1/AKR1C2/AKR1C3/NQO1/AIFM2/CAV1	9
BP	GO:0055072	iron ion homeostasis	6/83	87/18866	2.29378e-06	0.000122207	8.39263e-05	NOX5/TFRC/FTL/FTH1/HAMP/STEAP3	6
BP	GO:1901654	response to ketone	8/83	200/18866	2.77016e-06	0.00014415	9.89952e-05	PRKAA2/DUSP1/DDIT4/AKR1C2/AKR1C3/HSF1/SRC/CAV1	8
BP	GO:0048545	response to steroid hormone	10/83	346/18866	2.80583e-06	0.00014415	9.89952e-05	EGLN2/PTGS2/DUSP1/DDIT4/IL6/AKR1C3/SRC/TP63/ZFP36/CAV1	10
BP	GO:0010212	response to ionizing radiation	7/83	144/18866	3.33571e-06	0.000168366	0.000115626	NOX4/HRAS/HAMP/HSF1/FANCD2/HSPA5/PML	7
BP	GO:0010876	lipid localization	11/83	440/18866	3.49593e-06	0.00017341	0.00011909	ACSL4/MYB/PRKAA2/ABCC1/NOS2/IL6/DRD4/SLC2A1/AKR1C1/PLIN2/CAV1	11
BP	GO:0048732	gland development	11/83	443/18866	3.73067e-06	0.000181918	0.000124933	HRAS/ALOX15B/MAPK3/ASNS/IL6/HAMP/AURKA/SRC/PML/TP63/CAV1	11
BP	GO:0009314	response to radiation	11/83	447/18866	4.06511e-06	0.000194922	0.000133863	NOX4/HRAS/PTGS2/DUSP1/SLC7A11/ASNS/HAMP/HSF1/FANCD2/HSPA5/PML	11
BP	GO:1905039	carboxylic acid transmembrane transport	7/83	150/18866	4.37232e-06	0.000206216	0.000141619	SLC38A1/SLC1A5/PRKAA2/SLC7A11/SLC1A4/SLC7A5/SLC2A1	7
BP	GO:1903825	organic acid transmembrane transport	7/83	151/18866	4.56872e-06	0.000212003	0.000145594	SLC38A1/SLC1A5/PRKAA2/SLC7A11/SLC1A4/SLC7A5/SLC2A1	7
BP	GO:0043281	regulation of cysteine-type endopeptidase activity involved in apoptotic process	8/83	215/18866	4.73205e-06	0.000216097	0.000148405	ALOX12/DNAJB6/PTGS2/MT3/HSF1/SRC/PML/TP63	8
BP	GO:0062012	regulation of small molecule metabolic process	11/83	456/18866	4.91519e-06	0.000220953	0.00015174	PRKAA2/TAZ/PTGS2/NOS2/SLC7A11/DDIT4/SLC2A6/AKR1C3/NQO1/SRC/CAV1	11
BP	GO:0015908	fatty acid transport	6/83	101/18866	5.48163e-06	0.000242625	0.000166624	ACSL4/PRKAA2/NOS2/DRD4/SLC2A1/PLIN2	6
BP	GO:0031669	cellular response to nutrient levels	8/83	221/18866	5.7946e-06	0.000252592	0.000173468	MAPK3/PRKAA2/ATF3/ALB/ASNS/SLC2A1/AKR1C3/HSPA5	8
BP	GO:0046456	icosanoid biosynthetic process	5/83	59/18866	6.06187e-06	0.000259836	0.000178443	ALOX12/ALOX15/ALOX15B/PTGS2/AKR1C3	5
BP	GO:1901570	fatty acid derivative biosynthetic process	6/83	103/18866	6.1414e-06	0.000259836	0.000178443	ACSL4/ALOX12/ALOX15/ALOX15B/PTGS2/AKR1C3	6
BP	GO:1990776	response to angiotensin	4/83	28/18866	6.57909e-06	0.00027432	0.00018839	PTGS2/HSF1/SRC/CAV1	4
BP	GO:1902475	L-alpha-amino acid transmembrane transport	5/83	62/18866	7.75478e-06	0.000314404	0.000215918	SLC38A1/SLC1A5/SLC7A11/SLC1A4/SLC7A5	5
BP	GO:0098657	import into cell	8/83	230/18866	7.7637e-06	0.000314404	0.000215918	NOX5/SLC38A1/SLC1A5/SLC7A11/SLC1A4/SLC7A5/DRD4/SLC2A1	8
BP	GO:0031960	response to corticosteroid	7/83	164/18866	7.8683e-06	0.000314404	0.000215918	PTGS2/DUSP1/DDIT4/IL6/AKR1C3/SRC/ZFP36	7
BP	GO:0043618	regulation of transcription from RNA polymerase II promoter in response to stress	6/83	109/18866	8.51731e-06	0.000333263	0.000228869	ATF3/EGLN2/MT3/DDIT3/HSF1/HSPA5	6
BP	GO:0006869	lipid transport	10/83	393/18866	8.62441e-06	0.000333263	0.000228869	ACSL4/MYB/PRKAA2/ABCC1/NOS2/DRD4/SLC2A1/AKR1C1/PLIN2/CAV1	10
BP	GO:0071480	cellular response to gamma radiation	4/83	30/18866	8.74709e-06	0.000333263	0.000228869	NOX4/HRAS/HSF1/HSPA5	4
BP	GO:0018105	peptidyl-serine phosphorylation	9/83	310/18866	8.80361e-06	0.000333263	0.000228869	TFRC/MAPK3/PRKAA2/PTGS2/DDIT4/IL6/AURKA/SRC/CAV1	9
BP	GO:0046686	response to cadmium ion	5/83	64/18866	9.07447e-06	0.000339055	0.000232847	MAPK3/MT3/AKR1C3/HSF1/MT1G	5
BP	GO:0030647	aminoglycoside antibiotic metabolic process	3/83	10/18866	9.63624e-06	0.000355429	0.000244092	AKR1C1/AKR1C2/AKR1C3	3
BP	GO:2000116	regulation of cysteine-type endopeptidase activity	8/83	239/18866	1.02712e-05	0.000374055	0.000256884	ALOX12/DNAJB6/PTGS2/MT3/HSF1/SRC/PML/TP63	8
BP	GO:0006633	fatty acid biosynthetic process	7/83	173/18866	1.11555e-05	0.000401178	0.000275511	ALOX12/ALOX15/ALOX15B/PRKAA2/PTGS2/AKR1C3/FADS2	7
BP	GO:0015718	monocarboxylic acid transport	7/83	174/18866	1.15822e-05	0.000406607	0.000279239	ACSL4/PRKAA2/NOS2/DRD4/SLC2A1/AKR1C1/PLIN2	7
BP	GO:0043620	regulation of DNA-templated transcription in response to stress	6/83	115/18866	1.15891e-05	0.000406607	0.000279239	ATF3/EGLN2/MT3/DDIT3/HSF1/HSPA5	6
BP	GO:0071479	cellular response to ionizing radiation	5/83	68/18866	1.22369e-05	0.000424164	0.000291296	NOX4/HRAS/HAMP/HSF1/HSPA5	5
BP	GO:0051235	maintenance of location	9/83	324/18866	1.25303e-05	0.000428702	0.000294413	ALB/DDIT3/IL6/FTL/FTH1/HSPA5/PML/PLIN2/CAV1	9
BP	GO:0072330	monocarboxylic acid biosynthetic process	8/83	246/18866	1.26659e-05	0.000428702	0.000294413	ALOX12/ALOX15/ALOX15B/PRKAA2/PTGS2/ASNS/AKR1C3/FADS2	8
BP	GO:0120255	olefinic compound biosynthetic process	4/83	33/18866	1.29303e-05	0.000431803	0.000296542	ALOX12/ALOX15/ALOX15B/AKR1C3	4
BP	GO:0071496	cellular response to external stimulus	9/83	326/18866	1.31594e-05	0.000431803	0.000296542	MAPK3/PRKAA2/ATF3/PTGS2/ALB/ASNS/SLC2A1/AKR1C3/HSPA5	9
BP	GO:1990440	positive regulation of transcription from RNA polymerase II promoter in response to endoplasmic reticulum stress	3/83	11/18866	1.32077e-05	0.000431803	0.000296542	ATF3/DDIT3/HSPA5	3
BP	GO:0006879	cellular iron ion homeostasis	5/83	70/18866	1.41104e-05	0.000456129	0.000313248	NOX5/TFRC/FTL/FTH1/HAMP	5
BP	GO:0042759	long-chain fatty acid biosynthetic process	4/83	34/18866	1.46054e-05	0.000464424	0.000318945	ALOX12/ALOX15/ALOX15B/PTGS2	4
BP	GO:0071214	cellular response to abiotic stimulus	9/83	331/18866	1.48512e-05	0.000464424	0.000318945	NOX1/NOX4/HRAS/MAPK3/PTGS2/HAMP/SLC2A1/HSF1/HSPA5	9
BP	GO:0104004	cellular response to environmental stimulus	9/83	331/18866	1.48512e-05	0.000464424	0.000318945	NOX1/NOX4/HRAS/MAPK3/PTGS2/HAMP/SLC2A1/HSF1/HSPA5	9
BP	GO:0031668	cellular response to extracellular stimulus	8/83	253/18866	1.55149e-05	0.000476791	0.000327438	MAPK3/PRKAA2/ATF3/ALB/ASNS/SLC2A1/AKR1C3/HSPA5	8
BP	GO:0018209	peptidyl-serine modification	9/83	333/18866	1.55782e-05	0.000476791	0.000327438	TFRC/MAPK3/PRKAA2/PTGS2/DDIT4/IL6/AURKA/SRC/CAV1	9
BP	GO:0015807	L-amino acid transport	5/83	73/18866	1.73318e-05	0.000524879	0.000360463	SLC38A1/SLC1A5/SLC7A11/SLC1A4/SLC7A5	5
BP	GO:0072584	caveolin-mediated endocytosis	3/83	12/18866	1.75544e-05	0.000526082	0.000361289	MAPK3/SRC/CAV1	3
BP	GO:1901661	quinone metabolic process	4/83	36/18866	1.84274e-05	0.000546554	0.000375348	AKR1C1/AKR1C2/AKR1C3/AIFM2	4
BP	GO:0001894	tissue homeostasis	8/83	261/18866	1.94138e-05	0.000569933	0.000391404	NOX4/TFRC/PTGS2/ALB/IL6/HSPB1/SLC2A1/SRC	8
BP	GO:1903409	reactive oxygen species biosynthetic process	6/83	128/18866	2.13468e-05	0.000620351	0.000426028	NOX4/DUOX1/PTGS2/NOS2/NQO1/CAV1	6
BP	GO:0046683	response to organophosphorus	6/83	134/18866	2.7666e-05	0.000795951	0.000546622	NOX4/DUOX1/PTGS2/DUSP1/AKR1C1/HSPA5	6
BP	GO:0051054	positive regulation of DNA metabolic process	7/83	200/18866	2.84669e-05	0.000810883	0.000556877	NOX4/TFRC/MAPK3/IL6/HSF1/SRC/PML	7
BP	GO:0051180	vitamin transport	4/83	41/18866	3.11551e-05	0.000870226	0.000597631	ABCC1/SLC2A1/SLC2A6/SLC2A14	4
BP	GO:0089718	amino acid import across plasma membrane	4/83	41/18866	3.11551e-05	0.000870226	0.000597631	SLC1A5/SLC7A11/SLC1A4/SLC7A5	4
BP	GO:0046394	carboxylic acid biosynthetic process	9/83	367/18866	3.34618e-05	0.00092567	0.000635707	GLS2/ALOX12/ALOX15/ALOX15B/PRKAA2/PTGS2/ASNS/AKR1C3/FADS2	9
BP	GO:0016053	organic acid biosynthetic process	9/83	368/18866	3.41792e-05	0.000936511	0.000643152	GLS2/ALOX12/ALOX15/ALOX15B/PRKAA2/PTGS2/ASNS/AKR1C3/FADS2	9
BP	GO:0071222	cellular response to lipopolysaccharide	7/83	208/18866	3.657e-05	0.000992566	0.000681648	MAPK3/NOS2/IL6/HAMP/HSF1/SRC/ZFP36	7
BP	GO:0052547	regulation of peptidase activity	10/83	466/18866	3.72471e-05	0.0010015	0.00068778	ALOX12/MAPK3/DNAJB6/PTGS2/MT3/HSF1/SRC/PML/TP63/CAV1	10
BP	GO:0015804	neutral amino acid transport	4/83	43/18866	3.77133e-05	0.00100464	0.00068994	SLC38A1/SLC1A5/SLC1A4/SLC7A5	4
BP	GO:0060249	anatomical structure homeostasis	10/83	469/18866	3.93197e-05	0.00103782	0.000712728	NOX4/TFRC/MAPK3/PTGS2/ALB/IL6/HSPB1/SLC2A1/SRC/PML	10
BP	GO:0043523	regulation of neuron apoptotic process	7/83	214/18866	4.38182e-05	0.00114605	0.000787051	G6PD/HRAS/MYB/EGLN2/MT3/DDIT3/NQO1	7
BP	GO:0042542	response to hydrogen peroxide	6/83	146/18866	4.48069e-05	0.00116135	0.000797559	MYB/DUSP1/IL6/HSF1/NQO1/SRC	6
BP	GO:0043090	amino acid import	4/83	45/18866	4.52285e-05	0.00116181	0.000797875	SLC1A5/SLC7A11/SLC1A4/SLC7A5	4
BP	GO:0051651	maintenance of location in cell	7/83	216/18866	4.64813e-05	0.0011748	0.000806795	ALB/DDIT3/FTL/FTH1/HSPA5/PML/CAV1	7
BP	GO:0051592	response to calcium ion	6/83	147/18866	4.65508e-05	0.0011748	0.000806795	ALOX15/PRKAA2/DUSP1/AKR1C3/HSPA5/CAV1	6
BP	GO:0070542	response to fatty acid	5/83	90/18866	4.78341e-05	0.00119668	0.000821827	PRKAA2/PTGS2/AKR1C2/AKR1C3/SRC	5
BP	GO:0003333	amino acid transmembrane transport	5/83	92/18866	5.31576e-05	0.00130204	0.00089418	SLC38A1/SLC1A5/SLC7A11/SLC1A4/SLC7A5	5
BP	GO:0042448	progesterone metabolic process	3/83	17/18866	5.34031e-05	0.00130204	0.00089418	AKR1C1/AKR1C2/AKR1C3	3
BP	GO:0097501	stress response to metal ion	3/83	17/18866	5.34031e-05	0.00130204	0.00089418	MT3/MT1G/HSPA5	3
BP	GO:0071219	cellular response to molecule of bacterial origin	7/83	222/18866	5.52789e-05	0.00133645	0.000917811	MAPK3/NOS2/IL6/HAMP/HSF1/SRC/ZFP36	7
BP	GO:0070372	regulation of ERK1 and ERK2 cascade	8/83	306/18866	6.0055e-05	0.00143982	0.0009888	NOX4/HRAS/ALOX15/MAPK3/ATF3/DUSP1/MT3/SRC	8
BP	GO:0006692	prostanoid metabolic process	4/83	49/18866	6.34624e-05	0.0014844	0.00101942	PTGS2/AKR1C1/AKR1C2/AKR1C3	4
BP	GO:0006693	prostaglandin metabolic process	4/83	49/18866	6.34624e-05	0.0014844	0.00101942	PTGS2/AKR1C1/AKR1C2/AKR1C3	4
BP	GO:0042149	cellular response to glucose starvation	4/83	49/18866	6.34624e-05	0.0014844	0.00101942	PRKAA2/ASNS/SLC2A1/HSPA5	4
BP	GO:0006865	amino acid transport	6/83	156/18866	6.48263e-05	0.00150408	0.00103293	SLC38A1/SLC1A5/GLS2/SLC7A11/SLC1A4/SLC7A5	6
BP	GO:1901655	cellular response to ketone	5/83	97/18866	6.84763e-05	0.00157605	0.00108236	PRKAA2/DDIT4/AKR1C2/AKR1C3/SRC	5
BP	GO:0030168	platelet activation	6/83	158/18866	6.95757e-05	0.00158864	0.00109101	ALOX12/MAPK3/SLC7A11/IL6/HSPB1/SRC	6
BP	GO:0098656	anion transmembrane transport	8/83	315/18866	7.35499e-05	0.00166617	0.00114424	SLC38A1/SLC1A5/PRKAA2/ABCC1/SLC7A11/SLC1A4/SLC7A5/SLC2A1	8
BP	GO:0006984	ER-nucleus signaling pathway	4/83	51/18866	7.4353e-05	0.0016712	0.0011477	ATF3/ASNS/DDIT3/HSPA5	4
BP	GO:0007050	cell cycle arrest	7/83	234/18866	7.69832e-05	0.0017037	0.00117002	HRAS/CDKN2A/PRKAA2/DUSP1/DDIT3/AURKA/PML	7
BP	GO:0097305	response to alcohol	7/83	234/18866	7.69832e-05	0.0017037	0.00117002	G6PD/PRKAA2/HAMP/DRD4/AKR1C2/AKR1C3/NQO1	7
BP	GO:0070301	cellular response to hydrogen peroxide	5/83	100/18866	7.91759e-05	0.00173885	0.00119416	MYB/IL6/HSF1/NQO1/SRC	5
BP	GO:2001233	regulation of apoptotic signaling pathway	9/83	413/18866	8.31843e-05	0.00181304	0.00124511	NOX1/ATF3/PTGS2/DDIT3/HSPB1/SRC/PML/TP63/CAV1	9
BP	GO:1902644	tertiary alcohol metabolic process	3/83	20/18866	8.86793e-05	0.00191827	0.00131738	AKR1C1/AKR1C2/AKR1C3	3
BP	GO:0048661	positive regulation of smooth muscle cell proliferation	5/83	103/18866	9.11192e-05	0.0019341	0.00132825	NOX1/ALOX12/MYB/PTGS2/IL6	5
BP	GO:0070371	ERK1 and ERK2 cascade	8/83	325/18866	9.14115e-05	0.0019341	0.00132825	NOX4/HRAS/ALOX15/MAPK3/ATF3/DUSP1/MT3/SRC	8
BP	GO:2001242	regulation of intrinsic apoptotic signaling pathway	6/83	166/18866	9.14275e-05	0.0019341	0.00132825	NOX1/PTGS2/DDIT3/HSPB1/SRC/CAV1	6
BP	GO:0016137	glycoside metabolic process	3/83	21/18866	0.000103131	0.00216575	0.00148734	AKR1C1/AKR1C2/AKR1C3	3
BP	GO:0007584	response to nutrient	6/83	171/18866	0.000107648	0.00224422	0.00154123	ACSL4/PTGS2/HAMP/AKR1C3/HSF1/NQO1	6
BP	GO:0032496	response to lipopolysaccharide	8/83	334/18866	0.000110433	0.00228572	0.00156972	MAPK3/PTGS2/NOS2/IL6/HAMP/HSF1/SRC/ZFP36	8
BP	GO:0019748	secondary metabolic process	4/83	57/18866	0.000115196	0.00235049	0.00161421	SLC7A11/AKR1C1/AKR1C2/AKR1C3	4
BP	GO:0071398	cellular response to fatty acid	4/83	57/18866	0.000115196	0.00235049	0.00161421	PRKAA2/AKR1C2/AKR1C3/SRC	4
BP	GO:0006925	inflammatory cell apoptotic process	3/83	22/18866	0.000119036	0.00239488	0.00164469	CDKN2A/SLC7A11/IL6	3
BP	GO:0071379	cellular response to prostaglandin stimulus	3/83	22/18866	0.000119036	0.00239488	0.00164469	PRKAA2/AKR1C2/AKR1C3	3
BP	GO:1903829	positive regulation of cellular protein localization	8/83	338/18866	0.000119881	0.00239512	0.00164486	HRAS/TFRC/PRKAA2/BAP1/PTGS2/SQSTM1/SRC/TP63	8
BP	GO:0007596	blood coagulation	8/83	343/18866	0.000132623	0.00263141	0.00180713	ALOX12/MAPK3/SLC7A11/IL6/MAFG/HSPB1/SRC/CAV1	8
BP	GO:1901617	organic hydroxy compound biosynthetic process	7/83	258/18866	0.000141327	0.00276769	0.00190072	G6PD/ALOX12/ALOX15/ALOX15B/PRKAA2/SLC7A11/AKR1C3	7
BP	GO:0048608	reproductive structure development	9/83	443/18866	0.000141415	0.00276769	0.00190072	ALOX15B/MAPK3/DNAJB6/PTGS2/AKR1C3/HSF1/HSPA5/SRC/TP63	9
BP	GO:0007599	hemostasis	8/83	348/18866	0.000146464	0.00284715	0.00195529	ALOX12/MAPK3/SLC7A11/IL6/MAFG/HSPB1/SRC/CAV1	8
BP	GO:0050817	coagulation	8/83	349/18866	0.000149371	0.00288236	0.00197947	ALOX12/MAPK3/SLC7A11/IL6/MAFG/HSPB1/SRC/CAV1	8
BP	GO:0001819	positive regulation of cytokine production	9/83	447/18866	0.000151281	0.00288236	0.00197947	NOX1/HRAS/MYB/PTGS2/DDIT3/SLC7A5/IL6/HSPB1/SRC	9
BP	GO:0061458	reproductive system development	9/83	447/18866	0.000151281	0.00288236	0.00197947	ALOX15B/MAPK3/DNAJB6/PTGS2/AKR1C3/HSF1/HSPA5/SRC/TP63	9
BP	GO:0006986	response to unfolded protein	6/83	183/18866	0.000155997	0.00293336	0.0020145	ATF3/ASNS/DDIT3/HSPB1/HSF1/HSPA5	6
BP	GO:2001235	positive regulation of apoptotic signaling pathway	6/83	183/18866	0.000155997	0.00293336	0.0020145	NOX1/ATF3/DDIT3/PML/TP63/CAV1	6
BP	GO:0050730	regulation of peptidyl-tyrosine phosphorylation	7/83	263/18866	0.000159081	0.00297193	0.00204098	NOX4/IL6/HSF1/SRC/ENPP2/NF2/CAV1	7
BP	GO:0022900	electron transport chain	6/83	184/18866	0.000160695	0.0029827	0.00204838	NOX4/TAZ/NCF2/TXNRD1/GPX2/AIFM2	6
BP	GO:0030522	intracellular receptor signaling pathway	7/83	265/18866	0.000166671	0.0030738	0.00211094	ALOX15/ALOX15B/EGLN2/AKR1C3/SRC/PML/TP63	7
BP	GO:0002237	response to molecule of bacterial origin	8/83	356/18866	0.000171081	0.00313503	0.00215299	MAPK3/PTGS2/NOS2/IL6/HAMP/HSF1/SRC/ZFP36	8
BP	GO:0007569	cell aging	5/83	118/18866	0.000172979	0.00314975	0.0021631	NOX4/HRAS/CDKN2A/PML/TP63	5
BP	GO:0061436	establishment of skin barrier	3/83	25/18866	0.000176096	0.00316643	0.00217455	ALOX12/STMN1/TP63	3
BP	GO:1904385	cellular response to angiotensin	3/83	25/18866	0.000176096	0.00316643	0.00217455	HSF1/SRC/CAV1	3
BP	GO:0071478	cellular response to radiation	6/83	188/18866	0.000180616	0.00321469	0.0022077	NOX4/HRAS/PTGS2/HAMP/HSF1/HSPA5	6
BP	GO:0045453	bone resorption	4/83	64/18866	0.000181015	0.00321469	0.0022077	NOX4/TFRC/IL6/SRC	4
BP	GO:0010565	regulation of cellular ketone metabolic process	6/83	189/18866	0.000185889	0.00328099	0.00225323	PRKAA2/PTGS2/SLC7A11/AKR1C3/NQO1/CAV1	6
BP	GO:0045604	regulation of epidermal cell differentiation	4/83	65/18866	0.000192242	0.00337244	0.00231604	ALOX15B/MAFG/TP63/ZFP36	4
BP	GO:1900542	regulation of purine nucleotide metabolic process	5/83	121/18866	0.000194526	0.00339183	0.00232935	PRKAA2/TAZ/NOS2/DDIT4/SLC2A6	5
BP	GO:0051052	regulation of DNA metabolic process	8/83	365/18866	0.000202755	0.00351401	0.00241326	NOX4/TFRC/MAPK3/DUSP1/IL6/HSF1/SRC/PML	8
BP	GO:0006140	regulation of nucleotide metabolic process	5/83	123/18866	0.000209989	0.0036176	0.0024844	PRKAA2/TAZ/NOS2/DDIT4/SLC2A6	5
BP	GO:0022612	gland morphogenesis	5/83	124/18866	0.000218063	0.00373434	0.00256457	IL6/SRC/PML/TP63/CAV1	5
BP	GO:0072337	modified amino acid transport	3/83	27/18866	0.000222531	0.0037883	0.00260163	ABCC1/SLC7A11/SLC1A4	3
BP	GO:0018108	peptidyl-tyrosine phosphorylation	8/83	374/18866	0.000239104	0.00404648	0.00277894	NOX4/MAPK3/IL6/HSF1/SRC/ENPP2/NF2/CAV1	8
BP	GO:0010575	positive regulation of vascular endothelial growth factor production	3/83	28/18866	0.000248446	0.00413167	0.00283744	NOX1/PTGS2/IL6	3
BP	GO:0033561	regulation of water loss via skin	3/83	28/18866	0.000248446	0.00413167	0.00283744	ALOX12/STMN1/TP63	3
BP	GO:0071280	cellular response to copper ion	3/83	28/18866	0.000248446	0.00413167	0.00283744	MT3/HSF1/MT1G	3
BP	GO:2000377	regulation of reactive oxygen species metabolic process	6/83	200/18866	0.00025232	0.00414859	0.00284906	NOX4/G6PD/PTGS2/MT3/AKR1C3/CAV1	6
BP	GO:0018212	peptidyl-tyrosine modification	8/83	377/18866	0.000252347	0.00414859	0.00284906	NOX4/MAPK3/IL6/HSF1/SRC/ENPP2/NF2/CAV1	8
BP	GO:0035966	response to topologically incorrect protein	6/83	205/18866	0.000288098	0.00470943	0.00323421	ATF3/ASNS/DDIT3/HSPB1/HSF1/HSPA5	6
BP	GO:0071383	cellular response to steroid hormone stimulus	6/83	206/18866	0.00029571	0.00480654	0.0033009	EGLN2/DDIT4/AKR1C3/SRC/TP63/ZFP36	6
BP	GO:0034976	response to endoplasmic reticulum stress	7/83	294/18866	0.000313847	0.00507268	0.00348368	ALOX15/ATF3/ASNS/DDIT3/HSPA5/PML/CAV1	7
BP	GO:0051348	negative regulation of transferase activity	7/83	296/18866	0.000326954	0.00525501	0.0036089	CDKN2A/DUSP1/HSPB1/SRC/NF2/ZFP36/CAV1	7
BP	GO:0009064	glutamine family amino acid metabolic process	4/83	75/18866	0.000333804	0.00527667	0.00362377	GLS2/NOS2/SLC7A11/ASNS	4
BP	GO:0015909	long-chain fatty acid transport	4/83	75/18866	0.000333804	0.00527667	0.00362377	PRKAA2/DRD4/SLC2A1/PLIN2	4
BP	GO:0031100	animal organ regeneration	4/83	75/18866	0.000333804	0.00527667	0.00362377	IL6/HAMP/NNMT/AURKA	4
BP	GO:0043393	regulation of protein binding	6/83	211/18866	0.00033617	0.00528503	0.00362951	MAPK3/STMN1/AURKA/HSF1/SRC/CAV1	6
BP	GO:0034694	response to prostaglandin	3/83	32/18866	0.000371416	0.00574723	0.00394693	PRKAA2/AKR1C2/AKR1C3	3
BP	GO:0097421	liver regeneration	3/83	32/18866	0.000371416	0.00574723	0.00394693	IL6/HAMP/AURKA	3
BP	GO:0070374	positive regulation of ERK1 and ERK2 cascade	6/83	215/18866	0.000371562	0.00574723	0.00394693	NOX4/HRAS/ALOX15/MAPK3/MT3/SRC	6
BP	GO:0001889	liver development	5/83	141/18866	0.000394998	0.00607706	0.00417344	HRAS/ASNS/IL6/HAMP/AURKA	5
BP	GO:0006809	nitric oxide biosynthetic process	4/83	79/18866	0.000407175	0.0061782	0.0042429	PTGS2/NOS2/NQO1/CAV1	4
BP	GO:0033028	myeloid cell apoptotic process	3/83	33/18866	0.000407264	0.0061782	0.0042429	CDKN2A/SLC7A11/IL6	3
BP	GO:0031333	negative regulation of protein-containing complex assembly	5/83	142/18866	0.000408015	0.0061782	0.0042429	STMN1/CAPG/HSF1/HSPA5/SRC	5
BP	GO:0061008	hepaticobiliary system development	5/83	144/18866	0.000435017	0.00655259	0.00450001	HRAS/ASNS/IL6/HAMP/AURKA	5
BP	GO:0042908	xenobiotic transport	3/83	34/18866	0.000445263	0.00667199	0.00458201	ABCC1/SLC7A5/SLC2A1	3
BP	GO:0033135	regulation of peptidyl-serine phosphorylation	5/83	145/18866	0.000449014	0.00669333	0.00459667	TFRC/PTGS2/DDIT4/IL6/CAV1	5
BP	GO:0034620	cellular response to unfolded protein	5/83	146/18866	0.000463347	0.00687139	0.00471895	ATF3/ASNS/DDIT3/HSF1/HSPA5	5
BP	GO:0051384	response to glucocorticoid	5/83	147/18866	0.000478023	0.00705268	0.00484345	PTGS2/DUSP1/DDIT4/IL6/ZFP36	5
BP	GO:0006691	leukotriene metabolic process	3/83	35/18866	0.000485466	0.00712595	0.00489377	ALOX12/ALOX15/ABCC1	3
BP	GO:0071277	cellular response to calcium ion	4/83	83/18866	0.000491402	0.00717646	0.00492846	ALOX15/PRKAA2/AKR1C3/HSPA5	4
BP	GO:0014074	response to purine-containing compound	5/83	149/18866	0.000508423	0.00738755	0.00507342	NOX4/DUOX1/PTGS2/DUSP1/HSPA5	5
BP	GO:0046209	nitric oxide metabolic process	4/83	84/18866	0.000514257	0.00743476	0.00510584	PTGS2/NOS2/NQO1/CAV1	4
BP	GO:0043154	negative regulation of cysteine-type endopeptidase activity involved in apoptotic process	4/83	85/18866	0.000537859	0.0077371	0.00531348	DNAJB6/PTGS2/MT3/SRC	4
BP	GO:0042509	regulation of tyrosine phosphorylation of STAT protein	4/83	86/18866	0.000562221	0.00804731	0.00552652	IL6/HSF1/NF2/CAV1	4
BP	GO:2001057	reactive nitrogen species metabolic process	4/83	87/18866	0.000587358	0.00833187	0.00572194	PTGS2/NOS2/NQO1/CAV1	4
BP	GO:0002262	myeloid cell homeostasis	5/83	154/18866	0.000590789	0.00833187	0.00572194	G6PD/BAP1/SLC7A11/IL6/ZFP36	5
BP	GO:0062013	positive regulation of small molecule metabolic process	5/83	154/18866	0.000590789	0.00833187	0.00572194	PRKAA2/TAZ/PTGS2/NOS2/SRC	5
BP	GO:0071453	cellular response to oxygen levels	6/83	235/18866	0.000594575	0.00834435	0.00573051	NOX1/EGLN2/PTGS2/MT3/SRC/CAV1	6
BP	GO:0019216	regulation of lipid metabolic process	8/83	431/18866	0.000614114	0.00857673	0.0058901	PRKAA2/TAZ/PTGS2/TXNRD1/AKR1C3/SRC/PLIN2/CAV1	8
BP	GO:0007260	tyrosine phosphorylation of STAT protein	4/83	89/18866	0.00064001	0.00887592	0.00609557	IL6/HSF1/NF2/CAV1	4
BP	GO:0052548	regulation of endopeptidase activity	8/83	434/18866	0.0006426	0.00887592	0.00609557	ALOX12/DNAJB6/PTGS2/MT3/HSF1/SRC/PML/TP63	8
BP	GO:0098739	import across plasma membrane	5/83	157/18866	0.000644792	0.00887592	0.00609557	SLC1A5/SLC7A11/SLC1A4/SLC7A5/SLC2A1	5
BP	GO:0032660	regulation of interleukin-17 production	3/83	39/18866	0.000669338	0.00916993	0.00629748	DDIT3/SLC7A5/IL6	3
BP	GO:0022407	regulation of cell-cell adhesion	8/83	439/18866	0.000692447	0.0093999	0.00645541	TFRC/ALOX12/ALOX15/MYB/IL6/SRC/NF2/CAV1	8
BP	GO:0045682	regulation of epidermis development	4/83	91/18866	0.000695926	0.0093999	0.00645541	ALOX15B/MAFG/TP63/ZFP36	4
BP	GO:0046849	bone remodeling	4/83	91/18866	0.000695926	0.0093999	0.00645541	NOX4/TFRC/IL6/SRC	4
BP	GO:0008207	C21-steroid hormone metabolic process	3/83	40/18866	0.000721322	0.00965229	0.00662874	AKR1C1/AKR1C2/AKR1C3	3
BP	GO:0016572	histone phosphorylation	3/83	40/18866	0.000721322	0.00965229	0.00662874	MAPK3/PRKAA2/AURKA	3
BP	GO:1900407	regulation of cellular response to oxidative stress	4/83	92/18866	0.000725143	0.0096585	0.006633	NOX1/SLC7A11/HSPB1/AIFM2	4
BP	GO:2000117	negative regulation of cysteine-type endopeptidase activity	4/83	93/18866	0.000755217	0.0100127	0.00687627	DNAJB6/PTGS2/MT3/SRC	4
BP	GO:0043405	regulation of MAP kinase activity	7/83	342/18866	0.000772015	0.0101885	0.00699697	NOX4/HRAS/MAPK3/DUSP1/DRD4/SRC/CAV1	7
BP	GO:0038083	peptidyl-tyrosine autophosphorylation	3/83	41/18866	0.000775808	0.0101918	0.00699924	MAPK3/SRC/CAV1	3
BP	GO:0051591	response to cAMP	4/83	94/18866	0.000786163	0.0102809	0.00706042	NOX4/DUOX1/DUSP1/HSPA5	4
BP	GO:0007093	mitotic cell cycle checkpoint	5/83	166/18866	0.000829133	0.0107451	0.00737924	HRAS/DUSP1/AURKA/FANCD2/PML	5
BP	GO:0035967	cellular response to topologically incorrect protein	5/83	166/18866	0.000829133	0.0107451	0.00737924	ATF3/ASNS/DDIT3/HSF1/HSPA5	5
BP	GO:0036500	ATF6-mediated unfolded protein response	2/83	10/18866	0.000841045	0.0108506	0.00745169	DDIT3/HSPA5	2
BP	GO:0009896	positive regulation of catabolic process	8/83	454/18866	0.000861032	0.0110589	0.00759472	MAPK3/PRKAA2/EGLN2/IL6/AURKA/HSF1/ZFP36/CAV1	8
BP	GO:0036473	cell death in response to oxidative stress	4/83	97/18866	0.000884372	0.0110948	0.00761941	NOX1/SLC7A11/HSPB1/PML	4
BP	GO:1901216	positive regulation of neuron death	4/83	97/18866	0.000884372	0.0110948	0.00761941	MYB/DDIT4/DDIT3/NQO1	4
BP	GO:0045926	negative regulation of growth	6/83	254/18866	0.000891699	0.0110948	0.00761941	G6PD/ALOX15B/CDKN2A/MT3/MT1G/PML	6
BP	GO:0001953	negative regulation of cell-matrix adhesion	3/83	43/18866	0.000892481	0.0110948	0.00761941	CDKN2A/SRC/NF2	3
BP	GO:0008631	intrinsic apoptotic signaling pathway in response to oxidative stress	3/83	43/18866	0.000892481	0.0110948	0.00761941	NOX1/HSPB1/PML	3
BP	GO:0045124	regulation of bone resorption	3/83	43/18866	0.000892481	0.0110948	0.00761941	TFRC/IL6/SRC	3
BP	GO:0046688	response to copper ion	3/83	43/18866	0.000892481	0.0110948	0.00761941	MT3/HSF1/MT1G	3
BP	GO:0051100	negative regulation of binding	5/83	169/18866	0.000898538	0.0110948	0.00761941	MAPK3/DDIT3/STMN1/AURKA/CAV1	5
BP	GO:0052126	movement in host environment	5/83	169/18866	0.000898538	0.0110948	0.00761941	TFRC/SLC1A5/SRC/PML/CAV1	5
BP	GO:0006835	dicarboxylic acid transport	4/83	98/18866	0.000918945	0.0112502	0.00772613	SLC1A5/GLS2/SLC7A11/SLC1A4	4
BP	GO:0048010	vascular endothelial growth factor receptor signaling pathway	4/83	98/18866	0.000918945	0.0112502	0.00772613	NCF2/MT3/HSPB1/SRC	4
BP	GO:0051222	positive regulation of protein transport	7/83	354/18866	0.000944236	0.0114977	0.00789612	ACSL4/HRAS/BAP1/PTGS2/IL6/SRC/TP63	7
BP	GO:0030856	regulation of epithelial cell differentiation	5/83	171/18866	0.000947155	0.0114977	0.00789612	ALOX15B/MAFG/TP63/ZFP36/CAV1	5
BP	GO:0032620	interleukin-17 production	3/83	44/18866	0.000954759	0.0115414	0.00792606	DDIT3/SLC7A5/IL6	3
BP	GO:0009306	protein secretion	8/83	462/18866	0.000963608	0.0115996	0.00796605	NOX5/ACSL4/NOS2/IL6/STEAP3/DRD4/SLC2A1/SRC	8
BP	GO:0035592	establishment of protein localization to extracellular region	8/83	463/18866	0.000977092	0.0117129	0.00804386	NOX5/ACSL4/NOS2/IL6/STEAP3/DRD4/SLC2A1/SRC	8
BP	GO:0048660	regulation of smooth muscle cell proliferation	5/83	173/18866	0.000997704	0.0118345	0.00812736	NOX1/ALOX12/MYB/PTGS2/IL6	5
BP	GO:0042771	intrinsic apoptotic signaling pathway in response to DNA damage by p53 class mediator	3/83	45/18866	0.00101973	0.0118345	0.00812736	DDIT4/PML/TP63	3
BP	GO:0045616	regulation of keratinocyte differentiation	3/83	45/18866	0.00101973	0.0118345	0.00812736	ALOX15B/TP63/ZFP36	3
BP	GO:0060443	mammary gland morphogenesis	3/83	45/18866	0.00101973	0.0118345	0.00812736	SRC/PML/CAV1	3
BP	GO:0006857	oligopeptide transport	2/83	11/18866	0.00102501	0.0118345	0.00812736	ABCC1/SLC7A11	2
BP	GO:0019371	cyclooxygenase pathway	2/83	11/18866	0.00102501	0.0118345	0.00812736	PTGS2/AKR1C3	2
BP	GO:0070778	L-aspartate transmembrane transport	2/83	11/18866	0.00102501	0.0118345	0.00812736	SLC1A5/SLC1A4	2
BP	GO:0090084	negative regulation of inclusion body assembly	2/83	11/18866	0.00102501	0.0118345	0.00812736	DNAJB6/HSF1	2
BP	GO:2000392	regulation of lamellipodium morphogenesis	2/83	11/18866	0.00102501	0.0118345	0.00812736	SRC/ENPP2	2
BP	GO:1902882	regulation of response to oxidative stress	4/83	101/18866	0.00102837	0.0118345	0.00812736	NOX1/SLC7A11/HSPB1/AIFM2	4
BP	GO:0048659	smooth muscle cell proliferation	5/83	175/18866	0.00105023	0.0120379	0.00826709	NOX1/ALOX12/MYB/PTGS2/IL6	5
BP	GO:0071692	protein localization to extracellular region	8/83	470/18866	0.00107578	0.0122501	0.00841277	NOX5/ACSL4/NOS2/IL6/STEAP3/DRD4/SLC2A1/SRC	8
BP	GO:0010634	positive regulation of epithelial cell migration	5/83	176/18866	0.00107726	0.0122501	0.00841277	ALOX12/PTGS2/HSPB1/SRC/ENPP2	5
BP	GO:0009165	nucleotide biosynthetic process	6/83	266/18866	0.00113129	0.0127812	0.0087775	ACSL4/TAZ/PTGS2/NOS2/NNMT/RRM2	6
BP	GO:0048771	tissue remodeling	5/83	178/18866	0.00113285	0.0127812	0.0087775	NOX4/TFRC/IL6/SRC/CAV1	5
BP	GO:0006953	acute-phase response	3/83	47/18866	0.0011579	0.0130128	0.00893659	PTGS2/IL6/HAMP	3
BP	GO:0051098	regulation of binding	7/83	367/18866	0.00116366	0.0130266	0.00894608	MAPK3/DDIT3/STMN1/AURKA/HSF1/SRC/CAV1	7
BP	GO:1901293	nucleoside phosphate biosynthetic process	6/83	269/18866	0.00119825	0.0133099	0.00914065	ACSL4/TAZ/PTGS2/NOS2/NNMT/RRM2	6
BP	GO:0045862	positive regulation of proteolysis	7/83	370/18866	0.00121957	0.0133099	0.00914065	ALOX12/MAPK3/AURKA/HSF1/SRC/PML/CAV1	7
BP	GO:1904951	positive regulation of establishment of protein localization	7/83	370/18866	0.00121957	0.0133099	0.00914065	ACSL4/HRAS/BAP1/PTGS2/IL6/SRC/TP63	7
BP	GO:0006983	ER overload response	2/83	12/18866	0.0012265	0.0133099	0.00914065	DDIT3/HSPA5	2
BP	GO:0035404	histone-serine phosphorylation	2/83	12/18866	0.0012265	0.0133099	0.00914065	PRKAA2/AURKA	2
BP	GO:1902510	regulation of apoptotic DNA fragmentation	2/83	12/18866	0.0012265	0.0133099	0.00914065	IL6/HSF1	2
BP	GO:0030038	contractile actin filament bundle assembly	4/83	106/18866	0.0012306	0.0133099	0.00914065	NOX4/STMN1/SRC/NF2	4
BP	GO:0032091	negative regulation of protein binding	4/83	106/18866	0.0012306	0.0133099	0.00914065	MAPK3/STMN1/AURKA/CAV1	4
BP	GO:0043149	stress fiber assembly	4/83	106/18866	0.0012306	0.0133099	0.00914065	NOX4/STMN1/SRC/NF2	4
BP	GO:0072348	sulfur compound transport	3/83	49/18866	0.00130735	0.0140871	0.00967435	ABCC1/SLC7A11/SLC1A4	3
BP	GO:0033138	positive regulation of peptidyl-serine phosphorylation	4/83	109/18866	0.00136448	0.0145044	0.00996093	TFRC/PTGS2/IL6/CAV1	4
BP	GO:2000278	regulation of DNA biosynthetic process	4/83	109/18866	0.00136448	0.0145044	0.00996093	NOX4/MAPK3/DUSP1/SRC	4
BP	GO:0014009	glial cell proliferation	3/83	50/18866	0.00138641	0.0145044	0.00996093	MYB/IL6/NF2	3
BP	GO:0045981	positive regulation of nucleotide metabolic process	3/83	50/18866	0.00138641	0.0145044	0.00996093	PRKAA2/TAZ/NOS2	3
BP	GO:0046850	regulation of bone remodeling	3/83	50/18866	0.00138641	0.0145044	0.00996093	TFRC/IL6/SRC	3
BP	GO:0071715	icosanoid transport	3/83	50/18866	0.00138641	0.0145044	0.00996093	ABCC1/NOS2/DRD4	3
BP	GO:1900544	positive regulation of purine nucleotide metabolic process	3/83	50/18866	0.00138641	0.0145044	0.00996093	PRKAA2/TAZ/NOS2	3
BP	GO:1901571	fatty acid derivative transport	3/83	50/18866	0.00138641	0.0145044	0.00996093	ABCC1/NOS2/DRD4	3
BP	GO:0034504	protein localization to nucleus	6/83	277/18866	0.00139174	0.0145074	0.009963	TFRC/DNAJB6/PTGS2/SRC/PML/NF2	6
BP	GO:0016049	cell growth	8/83	490/18866	0.00140247	0.0145665	0.0100036	G6PD/CDKN2A/BAP1/EGLN2/MT3/HAMP/AURKA/PML	8
BP	GO:0043491	protein kinase B signaling	6/83	278/18866	0.00141751	0.0146697	0.0100745	NOX4/MT3/DDIT3/AKR1C2/AKR1C3/SRC	6
BP	GO:0022409	positive regulation of cell-cell adhesion	6/83	279/18866	0.00144365	0.0148866	0.0102234	TFRC/ALOX15/MYB/IL6/SRC/CAV1	6
BP	GO:0071354	cellular response to interleukin-6	3/83	51/18866	0.00146841	0.015088	0.0103617	IL6/HAMP/SRC	3
BP	GO:0006066	alcohol metabolic process	7/83	385/18866	0.00153156	0.0156252	0.0107306	G6PD/PRKAA2/MIOX/MT3/AKR1C1/AKR1C2/AKR1C3	7
BP	GO:0031349	positive regulation of defense response	7/83	385/18866	0.00153156	0.0156252	0.0107306	NRAS/HRAS/MAPK3/ABCC1/PTGS2/IL6/SRC	7
BP	GO:2001238	positive regulation of extrinsic apoptotic signaling pathway	3/83	52/18866	0.0015534	0.015792	0.0108452	ATF3/PML/CAV1	3
BP	GO:0031331	positive regulation of cellular catabolic process	7/83	390/18866	0.00164836	0.0166983	0.0114676	MAPK3/PRKAA2/IL6/AURKA/HSF1/ZFP36/CAV1	7
BP	GO:0034356	NAD biosynthesis via nicotinamide riboside salvage pathway	2/83	14/18866	0.00168145	0.0167388	0.0114954	PTGS2/NNMT	2
BP	GO:0035358	regulation of peroxisome proliferator activated receptor signaling pathway	2/83	14/18866	0.00168145	0.0167388	0.0114954	ALOX15/ALOX15B	2
BP	GO:0036295	cellular response to increased oxygen levels	2/83	14/18866	0.00168145	0.0167388	0.0114954	NOX1/CAV1	2
BP	GO:0038166	angiotensin-activated signaling pathway	2/83	14/18866	0.00168145	0.0167388	0.0114954	SRC/CAV1	2
BP	GO:1903624	regulation of DNA catabolic process	2/83	14/18866	0.00168145	0.0167388	0.0114954	IL6/HSF1	2
BP	GO:0050731	positive regulation of peptidyl-tyrosine phosphorylation	5/83	195/18866	0.00169513	0.0168169	0.011549	NOX4/IL6/HSF1/SRC/ENPP2	5
BP	GO:0010043	response to zinc ion	3/83	54/18866	0.00173249	0.0170805	0.0117301	MT3/HAMP/MT1G	3
BP	GO:0007565	female pregnancy	5/83	196/18866	0.00173358	0.0170805	0.0117301	ACSL4/MAPK3/PTGS2/SLC2A1/HSF1	5
BP	GO:0046164	alcohol catabolic process	3/83	55/18866	0.00182666	0.0178752	0.0122759	MIOX/MT3/AKR1C3	3
BP	GO:0070741	response to interleukin-6	3/83	55/18866	0.00182666	0.0178752	0.0122759	IL6/HAMP/SRC	3
BP	GO:0010273	detoxification of copper ion	2/83	15/18866	0.0019346	0.0185616	0.0127473	MT3/MT1G	2
BP	GO:0035635	entry of bacterium into host cell	2/83	15/18866	0.0019346	0.0185616	0.0127473	SRC/CAV1	2
BP	GO:0042574	retinal metabolic process	2/83	15/18866	0.0019346	0.0185616	0.0127473	AKR1C1/AKR1C3	2
BP	GO:1900119	positive regulation of execution phase of apoptosis	2/83	15/18866	0.0019346	0.0185616	0.0127473	IL6/HSF1	2
BP	GO:1990169	stress response to copper ion	2/83	15/18866	0.0019346	0.0185616	0.0127473	MT3/MT1G	2
BP	GO:0010952	positive regulation of peptidase activity	5/83	201/18866	0.00193552	0.0185616	0.0127473	ALOX12/MAPK3/HSF1/PML/CAV1	5
BP	GO:1901605	alpha-amino acid metabolic process	5/83	202/18866	0.00197789	0.0189049	0.012983	NOX4/GLS2/NOS2/SLC7A11/ASNS	5
BP	GO:0030520	intracellular estrogen receptor signaling pathway	3/83	57/18866	0.00202446	0.0192224	0.013201	EGLN2/SRC/TP63	3
BP	GO:0042743	hydrogen peroxide metabolic process	3/83	57/18866	0.00202446	0.0192224	0.013201	NOX1/DUOX1/MT3	3
BP	GO:0032970	regulation of actin filament-based process	7/83	405/18866	0.00204088	0.0193145	0.0132643	NOX4/HRAS/ALOX15/STMN1/CAPG/NF2/CAV1	7
BP	GO:0045471	response to ethanol	4/83	122/18866	0.00206332	0.0194629	0.0133662	G6PD/HAMP/DRD4/NQO1	4
BP	GO:0001780	neutrophil homeostasis	2/83	16/18866	0.00220467	0.0203949	0.0140063	SLC7A11/IL6	2
BP	GO:0032225	regulation of synaptic transmission, dopaminergic	2/83	16/18866	0.00220467	0.0203949	0.0140063	PTGS2/DRD4	2
BP	GO:0042532	negative regulation of tyrosine phosphorylation of STAT protein	2/83	16/18866	0.00220467	0.0203949	0.0140063	NF2/CAV1	2
BP	GO:0051238	sequestering of metal ion	2/83	16/18866	0.00220467	0.0203949	0.0140063	FTL/FTH1	2
BP	GO:0086103	G protein-coupled receptor signaling pathway involved in heart process	2/83	16/18866	0.00220467	0.0203949	0.0140063	SRC/CAV1	2
BP	GO:0090083	regulation of inclusion body assembly	2/83	16/18866	0.00220467	0.0203949	0.0140063	DNAJB6/HSF1	2
BP	GO:0043525	positive regulation of neuron apoptotic process	3/83	59/18866	0.00223511	0.0205874	0.0141385	MYB/DDIT3/NQO1	3
BP	GO:0030968	endoplasmic reticulum unfolded protein response	4/83	125/18866	0.00225409	0.0205874	0.0141385	ATF3/ASNS/DDIT3/HSPA5	4
BP	GO:0034605	cellular response to heat	4/83	125/18866	0.00225409	0.0205874	0.0141385	MAPK3/DNAJB6/PTGS2/HSF1	4
BP	GO:1903578	regulation of ATP metabolic process	4/83	125/18866	0.00225409	0.0205874	0.0141385	PRKAA2/TAZ/DDIT4/SLC2A6	4
BP	GO:0048511	rhythmic process	6/83	305/18866	0.00226192	0.0205935	0.0141426	PRKAA2/NOS2/DRD4/HSPA5/SRC/PML	6
BP	GO:0009612	response to mechanical stimulus	5/83	209/18866	0.00229374	0.0208173	0.0142963	MAPK3/PTGS2/ASNS/SLC2A1/SRC	5
BP	GO:1900180	regulation of protein localization to nucleus	4/83	127/18866	0.00238783	0.0216031	0.014836	TFRC/PTGS2/SRC/NF2	4
BP	GO:0051701	interaction with host	5/83	212/18866	0.00243978	0.0220039	0.0151112	TFRC/SLC1A5/SRC/PML/CAV1	5
BP	GO:0010574	regulation of vascular endothelial growth factor production	3/83	61/18866	0.00245888	0.0221069	0.015182	NOX1/PTGS2/IL6	3
BP	GO:0061687	detoxification of inorganic compound	2/83	17/18866	0.0024915	0.0221921	0.0152405	MT3/MT1G	2
BP	GO:0072673	lamellipodium morphogenesis	2/83	17/18866	0.0024915	0.0221921	0.0152405	SRC/ENPP2	2
BP	GO:2000811	negative regulation of anoikis	2/83	17/18866	0.0024915	0.0221921	0.0152405	SRC/CAV1	2
BP	GO:0001558	regulation of cell growth	7/83	420/18866	0.0025024	0.0222204	0.0152599	G6PD/CDKN2A/BAP1/EGLN2/MT3/HAMP/PML	7
BP	GO:0050870	positive regulation of T cell activation	5/83	214/18866	0.00254082	0.0224922	0.0154466	TFRC/MYB/IL6/SRC/CAV1	5
BP	GO:0070527	platelet aggregation	3/83	62/18866	0.00257577	0.022593	0.0155158	ALOX12/SLC7A11/HSPB1	3
BP	GO:0071384	cellular response to corticosteroid stimulus	3/83	62/18866	0.00257577	0.022593	0.0155158	DDIT4/AKR1C3/ZFP36	3
BP	GO:2001244	positive regulation of intrinsic apoptotic signaling pathway	3/83	62/18866	0.00257577	0.022593	0.0155158	NOX1/DDIT3/CAV1	3
BP	GO:0050727	regulation of inflammatory response	7/83	425/18866	0.0026729	0.0233737	0.016052	ALOX15/BAP1/ABCC1/PTGS2/NOS2/IL6/FANCD2	7
BP	GO:0032740	positive regulation of interleukin-17 production	2/83	18/18866	0.00279495	0.0242201	0.0166333	SLC7A5/IL6	2
BP	GO:1902074	response to salt	2/83	18/18866	0.00279495	0.0242201	0.0166333	HSF1/HSPA5	2
BP	GO:2000641	regulation of early endosome to late endosome transport	2/83	18/18866	0.00279495	0.0242201	0.0166333	MAPK3/SRC	2
BP	GO:0000075	cell cycle checkpoint	5/83	219/18866	0.00280672	0.0242491	0.0166531	HRAS/DUSP1/AURKA/FANCD2/PML	5
BP	GO:0032507	maintenance of protein location in cell	3/83	64/18866	0.00281974	0.0242886	0.0166803	HSPA5/PML/CAV1	3
BP	GO:0010573	vascular endothelial growth factor production	3/83	65/18866	0.00294687	0.0253079	0.0173803	NOX1/PTGS2/IL6	3
BP	GO:0009914	hormone transport	6/83	323/18866	0.00300612	0.0257399	0.017677	ACSL4/MYB/NOS2/SLC7A5/IL6/SLC2A1	6
BP	GO:0002699	positive regulation of immune effector process	5/83	223/18866	0.00303353	0.0258976	0.0177852	TFRC/MYB/NOS2/SLC7A5/IL6	5
BP	GO:2000378	negative regulation of reactive oxygen species metabolic process	3/83	66/18866	0.00307749	0.0261951	0.0179895	G6PD/MT3/CAV1	3
BP	GO:0060252	positive regulation of glial cell proliferation	2/83	19/18866	0.00311488	0.0264351	0.0181544	MYB/IL6	2
BP	GO:1900015	regulation of cytokine production involved in inflammatory response	3/83	67/18866	0.00321161	0.0271006	0.0186114	BAP1/NOS2/IL6	3
BP	GO:0044706	multi-multicellular organism process	5/83	226/18866	0.00321213	0.0271006	0.0186114	ACSL4/MAPK3/PTGS2/SLC2A1/HSF1	5
BP	GO:0010812	negative regulation of cell-substrate adhesion	3/83	68/18866	0.00334927	0.028175	0.0193493	CDKN2A/SRC/NF2	3
BP	GO:0001933	negative regulation of protein phosphorylation	7/83	444/18866	0.00340382	0.0285313	0.0195939	CDKN2A/ATF3/DUSP1/DDIT4/HSPB1/NF2/CAV1	7
BP	GO:0008202	steroid metabolic process	6/83	332/18866	0.00344061	0.0285313	0.0195939	G6PD/PRKAA2/MT3/AKR1C1/AKR1C2/AKR1C3	6
BP	GO:0050863	regulation of T cell activation	6/83	332/18866	0.00344061	0.0285313	0.0195939	TFRC/MYB/IL6/FANCD2/SRC/CAV1	6
BP	GO:0010042	response to manganese ion	2/83	20/18866	0.00345112	0.0285313	0.0195939	PTGS2/HSPA5	2
BP	GO:0071243	cellular response to arsenic-containing substance	2/83	20/18866	0.00345112	0.0285313	0.0195939	ATF3/HSF1	2
BP	GO:0071636	positive regulation of transforming growth factor beta production	2/83	20/18866	0.00345112	0.0285313	0.0195939	MYB/PTGS2	2
BP	GO:0032355	response to estradiol	4/83	141/18866	0.00348023	0.0286895	0.0197026	PTGS2/DUSP1/HSF1/NQO1	4
BP	GO:2000573	positive regulation of DNA biosynthetic process	3/83	69/18866	0.0034905	0.0286919	0.0197043	NOX4/MAPK3/SRC	3
BP	GO:0007292	female gamete generation	4/83	142/18866	0.00356928	0.0291728	0.0200345	PTGS2/AURKA/HSF1/SRC	4
BP	GO:0046425	regulation of receptor signaling pathway via JAK-STAT	4/83	142/18866	0.00356928	0.0291728	0.0200345	IL6/HSF1/NF2/CAV1	4
BP	GO:0043254	regulation of protein-containing complex assembly	7/83	449/18866	0.00361942	0.0294988	0.0202584	TFRC/ALOX15/STMN1/CAPG/HSF1/HSPA5/SRC	7
BP	GO:0002534	cytokine production involved in inflammatory response	3/83	70/18866	0.00363533	0.0295447	0.02029	BAP1/NOS2/IL6	3
BP	GO:0045598	regulation of fat cell differentiation	4/83	143/18866	0.00365987	0.0296604	0.0203694	PTGS2/DDIT3/IL6/ZFP36	4
BP	GO:0014823	response to activity	3/83	71/18866	0.00378378	0.0303124	0.0208172	PRKAA2/IL6/HSF1	3
BP	GO:0050891	multicellular organismal water homeostasis	3/83	71/18866	0.00378378	0.0303124	0.0208172	ALOX12/STMN1/TP63	3
BP	GO:1903039	positive regulation of leukocyte cell-cell adhesion	5/83	235/18866	0.00379347	0.0303124	0.0208172	TFRC/MYB/IL6/SRC/CAV1	5
BP	GO:0050673	epithelial cell proliferation	7/83	453/18866	0.00379928	0.0303124	0.0208172	NOX5/NRAS/HRAS/IL6/TP63/ZFP36/CAV1	7
BP	GO:0035357	peroxisome proliferator activated receptor signaling pathway	2/83	21/18866	0.00380354	0.0303124	0.0208172	ALOX15/ALOX15B	2
BP	GO:0071498	cellular response to fluid shear stress	2/83	21/18866	0.00380354	0.0303124	0.0208172	PTGS2/SRC	2
BP	GO:0006520	cellular amino acid metabolic process	6/83	340/18866	0.00386474	0.0307151	0.0210937	NOX4/GLS2/NOS2/SLC7A11/ASNS/NQO1	6
BP	GO:0051090	regulation of DNA-binding transcription factor activity	7/83	455/18866	0.00389173	0.0308444	0.0211825	TFRC/MAPK3/CDKN2A/DDIT3/IL6/FANCD2/CAV1	7
BP	GO:0045930	negative regulation of mitotic cell cycle	6/83	341/18866	0.00392037	0.030986	0.0212797	HRAS/CDKN2A/DUSP1/AURKA/FANCD2/PML	6
BP	GO:0044409	entry into host	4/83	147/18866	0.00403785	0.0318271	0.0218574	TFRC/SLC1A5/SRC/CAV1	4
BP	GO:0071901	negative regulation of protein serine/threonine kinase activity	4/83	148/18866	0.00413632	0.0325142	0.0223292	CDKN2A/DUSP1/HSPB1/CAV1	4
BP	GO:0051900	regulation of mitochondrial depolarization	2/83	22/18866	0.00417199	0.0326164	0.0223994	ALOX12/SRC	2
BP	GO:0055093	response to hyperoxia	2/83	22/18866	0.00417199	0.0326164	0.0223994	NOX1/CAV1	2
BP	GO:0009615	response to virus	6/83	349/18866	0.00438706	0.0342048	0.0234903	DDIT4/IL6/HSPB1/STMN1/SRC/PML	6
BP	GO:0061041	regulation of wound healing	4/83	151/18866	0.00444145	0.0343909	0.0236181	DUOX1/HRAS/ALOX12/CAV1	4
BP	GO:1904892	regulation of receptor signaling pathway via STAT	4/83	151/18866	0.00444145	0.0343909	0.0236181	IL6/HSF1/NF2/CAV1	4
BP	GO:0033002	muscle cell proliferation	5/83	244/18866	0.00444679	0.0343909	0.0236181	NOX1/ALOX12/MYB/PTGS2/IL6	5
BP	GO:0006541	glutamine metabolic process	2/83	23/18866	0.00455633	0.0348632	0.0239424	GLS2/ASNS	2
BP	GO:0031281	positive regulation of cyclase activity	2/83	23/18866	0.00455633	0.0348632	0.0239424	MAPK3/NOS2	2
BP	GO:0060547	negative regulation of necrotic cell death	2/83	23/18866	0.00455633	0.0348632	0.0239424	MT3/CAV1	2
BP	GO:1902001	fatty acid transmembrane transport	2/83	23/18866	0.00455633	0.0348632	0.0239424	PRKAA2/SLC2A1	2
BP	GO:0050708	regulation of protein secretion	6/83	352/18866	0.00457226	0.0348693	0.0239466	ACSL4/NOS2/IL6/DRD4/SLC2A1/SRC	6
BP	GO:1901616	organic hydroxy compound catabolic process	3/83	76/18866	0.00458136	0.0348693	0.0239466	MIOX/MT3/AKR1C3	3
BP	GO:0006469	negative regulation of protein kinase activity	5/83	246/18866	0.00460223	0.0349356	0.0239922	CDKN2A/DUSP1/HSPB1/NF2/CAV1	5
BP	GO:0070838	divalent metal ion transport	7/83	471/18866	0.00469441	0.0355416	0.0244083	G6PD/PTGS2/MT3/DDIT3/DRD4/PML/CAV1	7
BP	GO:1903201	regulation of oxidative stress-induced cell death	3/83	77/18866	0.00475213	0.0358842	0.0246436	NOX1/SLC7A11/HSPB1	3
BP	GO:0001895	retina homeostasis	3/83	78/18866	0.0049267	0.036589	0.0251276	ALB/HSPB1/SLC2A1	3
BP	GO:0072332	intrinsic apoptotic signaling pathway by p53 class mediator	3/83	78/18866	0.0049267	0.036589	0.0251276	DDIT4/PML/TP63	3
BP	GO:0051882	mitochondrial depolarization	2/83	24/18866	0.00495641	0.036589	0.0251276	ALOX12/SRC	2
BP	GO:0060444	branching involved in mammary gland duct morphogenesis	2/83	24/18866	0.00495641	0.036589	0.0251276	SRC/PML	2
BP	GO:0070841	inclusion body assembly	2/83	24/18866	0.00495641	0.036589	0.0251276	DNAJB6/HSF1	2
BP	GO:0071294	cellular response to zinc ion	2/83	24/18866	0.00495641	0.036589	0.0251276	MT3/MT1G	2
BP	GO:2000209	regulation of anoikis	2/83	24/18866	0.00495641	0.036589	0.0251276	SRC/CAV1	2
BP	GO:2000637	positive regulation of gene silencing by miRNA	2/83	24/18866	0.00495641	0.036589	0.0251276	IL6/ZFP36	2
BP	GO:0032386	regulation of intracellular transport	6/83	358/18866	0.00495992	0.036589	0.0251276	HRAS/MAPK3/BAP1/PTGS2/SRC/TP63	6
BP	GO:0001890	placenta development	4/83	156/18866	0.00498315	0.0366269	0.0251536	MAPK3/DNAJB6/PTGS2/HSF1	4
BP	GO:0072511	divalent inorganic cation transport	7/83	478/18866	0.00508256	0.0366269	0.0251536	G6PD/PTGS2/MT3/DDIT3/DRD4/PML/CAV1	7
BP	GO:0071560	cellular response to transforming growth factor beta stimulus	5/83	252/18866	0.00509175	0.0366269	0.0251536	NOX4/HSPA5/SRC/PML/CAV1	5
BP	GO:0032956	regulation of actin cytoskeleton organization	6/83	360/18866	0.00509437	0.0366269	0.0251536	NOX4/HRAS/ALOX15/STMN1/CAPG/NF2	6
BP	GO:0043271	negative regulation of ion transport	4/83	157/18866	0.00509657	0.0366269	0.0251536	PTGS2/HAMP/DRD4/CAV1	4
BP	GO:0051017	actin filament bundle assembly	4/83	157/18866	0.00509657	0.0366269	0.0251536	NOX4/STMN1/SRC/NF2	4
BP	GO:0030104	water homeostasis	3/83	79/18866	0.0051051	0.0366269	0.0251536	ALOX12/STMN1/TP63	3
BP	GO:0043536	positive regulation of blood vessel endothelial cell migration	3/83	79/18866	0.0051051	0.0366269	0.0251536	ALOX12/PTGS2/HSPB1	3
BP	GO:0071260	cellular response to mechanical stimulus	3/83	79/18866	0.0051051	0.0366269	0.0251536	MAPK3/PTGS2/SLC2A1	3
BP	GO:0090398	cellular senescence	3/83	79/18866	0.0051051	0.0366269	0.0251536	HRAS/CDKN2A/PML	3
BP	GO:1900034	regulation of cellular response to heat	3/83	79/18866	0.0051051	0.0366269	0.0251536	MAPK3/DNAJB6/HSF1	3
BP	GO:0051896	regulation of protein kinase B signaling	5/83	253/18866	0.00517679	0.0369569	0.0253803	NOX4/DDIT3/AKR1C2/AKR1C3/SRC	5
BP	GO:0051924	regulation of calcium ion transport	5/83	253/18866	0.00517679	0.0369569	0.0253803	G6PD/PTGS2/DRD4/PML/CAV1	5
BP	GO:0035051	cardiocyte differentiation	4/83	158/18866	0.00521171	0.0371141	0.0254882	NOX4/G6PD/MAPK3/HAMP	4
BP	GO:0016569	covalent chromatin modification	7/83	481/18866	0.00525613	0.0372836	0.0256047	MAPK3/MYB/PRKAA2/BAP1/MT3/AURKA/HELLS	7
BP	GO:0006110	regulation of glycolytic process	3/83	80/18866	0.00528736	0.0372836	0.0256047	PRKAA2/DDIT4/SLC2A6	3
BP	GO:0032204	regulation of telomere maintenance	3/83	80/18866	0.00528736	0.0372836	0.0256047	MAPK3/SRC/PML	3
BP	GO:1900182	positive regulation of protein localization to nucleus	3/83	80/18866	0.00528736	0.0372836	0.0256047	TFRC/PTGS2/SRC	3
BP	GO:0010447	response to acidic pH	2/83	25/18866	0.00537209	0.0374225	0.0257	NOX1/SRC	2
BP	GO:0015740	C4-dicarboxylate transport	2/83	25/18866	0.00537209	0.0374225	0.0257	SLC1A5/SLC1A4	2
BP	GO:0046697	decidualization	2/83	25/18866	0.00537209	0.0374225	0.0257	MAPK3/PTGS2	2
BP	GO:0060148	positive regulation of posttranscriptional gene silencing	2/83	25/18866	0.00537209	0.0374225	0.0257	IL6/ZFP36	2
BP	GO:0061050	regulation of cell growth involved in cardiac muscle cell development	2/83	25/18866	0.00537209	0.0374225	0.0257	G6PD/HAMP	2
BP	GO:0042326	negative regulation of phosphorylation	7/83	484/18866	0.00543414	0.0376989	0.0258898	CDKN2A/ATF3/DUSP1/DDIT4/HSPB1/NF2/CAV1	7
BP	GO:0048872	homeostasis of number of cells	5/83	256/18866	0.00543797	0.0376989	0.0258898	G6PD/BAP1/SLC7A11/IL6/ZFP36	5
BP	GO:0019915	lipid storage	3/83	81/18866	0.00547349	0.0377632	0.025934	IL6/PLIN2/CAV1	3
BP	GO:0033238	regulation of cellular amine metabolic process	3/83	81/18866	0.00547349	0.0377632	0.025934	SLC7A11/DRD4/NQO1	3
BP	GO:0061572	actin filament bundle organization	4/83	161/18866	0.00556758	0.0383204	0.0263167	NOX4/STMN1/SRC/NF2	4
BP	GO:0071559	response to transforming growth factor beta	5/83	258/18866	0.00561719	0.0385696	0.0264878	NOX4/HSPA5/SRC/PML/CAV1	5
BP	GO:0043467	regulation of generation of precursor metabolites and energy	4/83	162/18866	0.00568973	0.038882	0.0267024	PRKAA2/NOS2/DDIT4/SLC2A6	4
BP	GO:2001236	regulation of extrinsic apoptotic signaling pathway	4/83	162/18866	0.00568973	0.038882	0.0267024	ATF3/SRC/PML/CAV1	4
BP	GO:0000188	inactivation of MAPK activity	2/83	26/18866	0.00580322	0.0391004	0.0268523	DUSP1/CAV1	2
BP	GO:0006309	apoptotic DNA fragmentation	2/83	26/18866	0.00580322	0.0391004	0.0268523	IL6/HSF1	2
BP	GO:0019430	removal of superoxide radicals	2/83	26/18866	0.00580322	0.0391004	0.0268523	MT3/NQO1	2
BP	GO:0030810	positive regulation of nucleotide biosynthetic process	2/83	26/18866	0.00580322	0.0391004	0.0268523	TAZ/NOS2	2
BP	GO:1900373	positive regulation of purine nucleotide biosynthetic process	2/83	26/18866	0.00580322	0.0391004	0.0268523	TAZ/NOS2	2
BP	GO:1903649	regulation of cytoplasmic transport	2/83	26/18866	0.00580322	0.0391004	0.0268523	MAPK3/SRC	2
BP	GO:0048145	regulation of fibroblast proliferation	3/83	83/18866	0.00585748	0.039282	0.026977	MYB/FTH1/PML	3
BP	GO:0048708	astrocyte differentiation	3/83	83/18866	0.00585748	0.039282	0.026977	MAPK3/MT3/IL6	3
BP	GO:0007259	receptor signaling pathway via JAK-STAT	4/83	164/18866	0.00593936	0.0397385	0.0272905	IL6/HSF1/NF2/CAV1	4
BP	GO:0048144	fibroblast proliferation	3/83	84/18866	0.00605538	0.0404207	0.027759	MYB/FTH1/PML	3
BP	GO:0043406	positive regulation of MAP kinase activity	5/83	264/18866	0.0061799	0.041051	0.0281919	NOX4/HRAS/MAPK3/DRD4/SRC	5
BP	GO:0009408	response to heat	4/83	166/18866	0.0061962	0.041051	0.0281919	MAPK3/DNAJB6/PTGS2/HSF1	4
BP	GO:0001963	synaptic transmission, dopaminergic	2/83	27/18866	0.00624968	0.041051	0.0281919	PTGS2/DRD4	2
BP	GO:0009065	glutamine family amino acid catabolic process	2/83	27/18866	0.00624968	0.041051	0.0281919	GLS2/NOS2	2
BP	GO:0015949	nucleobase-containing small molecule interconversion	2/83	27/18866	0.00624968	0.041051	0.0281919	TXNRD1/RRM2	2
BP	GO:0046426	negative regulation of receptor signaling pathway via JAK-STAT	2/83	27/18866	0.00624968	0.041051	0.0281919	NF2/CAV1	2
BP	GO:1902175	regulation of oxidative stress-induced intrinsic apoptotic signaling pathway	2/83	27/18866	0.00624968	0.041051	0.0281919	NOX1/HSPB1	2
BP	GO:0001776	leukocyte homeostasis	3/83	86/18866	0.00646308	0.0421504	0.0289469	BAP1/SLC7A11/IL6	3
BP	GO:0034109	homotypic cell-cell adhesion	3/83	86/18866	0.00646308	0.0421504	0.0289469	ALOX12/SLC7A11/HSPB1	3
BP	GO:0046883	regulation of hormone secretion	5/83	267/18866	0.00647566	0.0421504	0.0289469	ACSL4/MYB/NOS2/IL6/SLC2A1	5
BP	GO:0072331	signal transduction by p53 class mediator	5/83	267/18866	0.00647566	0.0421504	0.0289469	PRKAA2/DDIT4/AURKA/PML/TP63	5
BP	GO:0033673	negative regulation of kinase activity	5/83	268/18866	0.00657643	0.0427097	0.029331	CDKN2A/DUSP1/HSPB1/NF2/CAV1	5
BP	GO:0002791	regulation of peptide secretion	6/83	381/18866	0.00667295	0.0432389	0.0296945	ACSL4/NOS2/IL6/DRD4/SLC2A1/SRC	6
BP	GO:0071450	cellular response to oxygen radical	2/83	28/18866	0.00671131	0.0432925	0.0297313	MT3/NQO1	2
BP	GO:0071451	cellular response to superoxide	2/83	28/18866	0.00671131	0.0432925	0.0297313	MT3/NQO1	2
BP	GO:2000241	regulation of reproductive process	4/83	170/18866	0.00673186	0.0433279	0.0297556	NOX5/DUSP1/AURKA/SRC	4
BP	GO:1905952	regulation of lipid localization	4/83	171/18866	0.00687041	0.0441209	0.0303002	MYB/IL6/PLIN2/CAV1	4
BP	GO:0009435	NAD biosynthetic process	2/83	29/18866	0.00718799	0.0458533	0.0314899	PTGS2/NNMT	2
BP	GO:0033032	regulation of myeloid cell apoptotic process	2/83	29/18866	0.00718799	0.0458533	0.0314899	CDKN2A/SLC7A11	2
BP	GO:0036296	response to increased oxygen levels	2/83	29/18866	0.00718799	0.0458533	0.0314899	NOX1/CAV1	2
BP	GO:0001659	temperature homeostasis	4/83	174/18866	0.00729739	0.0463457	0.0318281	PTGS2/DDIT3/HSF1/CAV1	4
BP	GO:0097696	receptor signaling pathway via STAT	4/83	174/18866	0.00729739	0.0463457	0.0318281	IL6/HSF1/NF2/CAV1	4
BP	GO:0043470	regulation of carbohydrate catabolic process	3/83	90/18866	0.00732668	0.0464292	0.0318854	PRKAA2/DDIT4/SLC2A6	3
BP	GO:0014706	striated muscle tissue development	6/83	389/18866	0.0073591	0.0465321	0.0319561	NOX4/G6PD/ATF3/TAZ/HAMP/CAV1	6
BP	GO:0034103	regulation of tissue remodeling	3/83	91/18866	0.00755273	0.0472374	0.0324404	TFRC/IL6/SRC	3
BP	GO:0051492	regulation of stress fiber assembly	3/83	91/18866	0.00755273	0.0472374	0.0324404	NOX4/STMN1/NF2	3
BP	GO:0051899	membrane depolarization	3/83	91/18866	0.00755273	0.0472374	0.0324404	ALOX12/SRC/CAV1	3
BP	GO:0097306	cellular response to alcohol	3/83	91/18866	0.00755273	0.0472374	0.0324404	PRKAA2/AKR1C2/AKR1C3	3
BP	GO:1904063	negative regulation of cation transmembrane transport	3/83	91/18866	0.00755273	0.0472374	0.0324404	HAMP/DRD4/CAV1	3
BP	GO:0015980	energy derivation by oxidation of organic compounds	5/83	278/18866	0.00764542	0.0473107	0.0324908	CS/TAZ/NOS2/MT3/AIFM2	5
BP	GO:0110053	regulation of actin filament organization	5/83	278/18866	0.00764542	0.0473107	0.0324908	NOX4/ALOX15/STMN1/CAPG/NF2	5
BP	GO:0000303	response to superoxide	2/83	30/18866	0.00767956	0.0473107	0.0324908	MT3/NQO1	2
BP	GO:0001516	prostaglandin biosynthetic process	2/83	30/18866	0.00767956	0.0473107	0.0324908	PTGS2/AKR1C3	2
BP	GO:0033137	negative regulation of peptidyl-serine phosphorylation	2/83	30/18866	0.00767956	0.0473107	0.0324908	DDIT4/CAV1	2
BP	GO:0046457	prostanoid biosynthetic process	2/83	30/18866	0.00767956	0.0473107	0.0324908	PTGS2/AKR1C3	2
BP	GO:1900027	regulation of ruffle assembly	2/83	30/18866	0.00767956	0.0473107	0.0324908	HRAS/CAV1	2
BP	GO:1905897	regulation of response to endoplasmic reticulum stress	3/83	92/18866	0.00778287	0.0478447	0.0328575	DDIT3/HSPA5/CAV1	3
BP	GO:0051897	positive regulation of protein kinase B signaling	4/83	178/18866	0.00789349	0.0484212	0.0332534	NOX4/AKR1C2/AKR1C3/SRC	4
BP	GO:0010959	regulation of metal ion transport	6/83	396/18866	0.00800027	0.0487638	0.0334887	G6PD/PTGS2/HAMP/DRD4/PML/CAV1	6
BP	GO:0002532	production of molecular mediator involved in inflammatory response	3/83	93/18866	0.00801713	0.0487638	0.0334887	BAP1/NOS2/IL6	3
BP	GO:0045185	maintenance of protein location	3/83	93/18866	0.00801713	0.0487638	0.0334887	HSPA5/PML/CAV1	3
BP	GO:0061097	regulation of protein tyrosine kinase activity	3/83	93/18866	0.00801713	0.0487638	0.0334887	NOX4/SRC/CAV1	3
BP	GO:0000305	response to oxygen radical	2/83	31/18866	0.0081859	0.0492762	0.0338406	MT3/NQO1	2
BP	GO:0002675	positive regulation of acute inflammatory response	2/83	31/18866	0.0081859	0.0492762	0.0338406	PTGS2/IL6	2
BP	GO:0007143	female meiotic nuclear division	2/83	31/18866	0.0081859	0.0492762	0.0338406	AURKA/HSF1	2
BP	GO:1901796	regulation of signal transduction by p53 class mediator	4/83	180/18866	0.0082032	0.0492762	0.0338406	PRKAA2/AURKA/PML/TP63	4
BP	GO:0010660	regulation of muscle cell apoptotic process	3/83	94/18866	0.00825551	0.0492762	0.0338406	ALOX12/CDKN2A/HSF1	3
BP	GO:0030641	regulation of cellular pH	3/83	94/18866	0.00825551	0.0492762	0.0338406	NOX1/MAPK3/MAFG	3
BP	GO:0034308	primary alcohol metabolic process	3/83	94/18866	0.00825551	0.0492762	0.0338406	AKR1C1/AKR1C2/AKR1C3	3
BP	GO:1904035	regulation of epithelial cell apoptotic process	3/83	94/18866	0.00825551	0.0492762	0.0338406	IL6/AKR1C3/ZFP36	3
BP	GO:1905954	positive regulation of lipid localization	3/83	94/18866	0.00825551	0.0492762	0.0338406	MYB/PLIN2/CAV1	3
BP	GO:0050796	regulation of insulin secretion	4/83	181/18866	0.00836101	0.0498025	0.034202	ACSL4/NOS2/IL6/SLC2A1	4
BP	GO:0090316	positive regulation of intracellular protein transport	4/83	182/18866	0.0085208	0.0506494	0.0347837	HRAS/BAP1/PTGS2/TP63	4
BP	GO:0051403	stress-activated MAPK cascade	5/83	286/18866	0.00858372	0.0509139	0.0349653	NOX1/HRAS/MAPK3/DUSP1/ZFP36	5
BP	GO:1903034	regulation of response to wounding	4/83	183/18866	0.00868258	0.0509139	0.0349653	DUOX1/HRAS/ALOX12/CAV1	4
BP	GO:0019359	nicotinamide nucleotide biosynthetic process	2/83	32/18866	0.00870686	0.0509139	0.0349653	PTGS2/NNMT	2
BP	GO:0019363	pyridine nucleotide biosynthetic process	2/83	32/18866	0.00870686	0.0509139	0.0349653	PTGS2/NNMT	2
BP	GO:0032673	regulation of interleukin-4 production	2/83	32/18866	0.00870686	0.0509139	0.0349653	DDIT3/SLC7A5	2
BP	GO:0042744	hydrogen peroxide catabolic process	2/83	32/18866	0.00870686	0.0509139	0.0349653	DUOX1/MT3	2
BP	GO:0060603	mammary gland duct morphogenesis	2/83	32/18866	0.00870686	0.0509139	0.0349653	SRC/PML	2
BP	GO:0071353	cellular response to interleukin-4	2/83	32/18866	0.00870686	0.0509139	0.0349653	HSPA5/PML	2
BP	GO:0071674	mononuclear cell migration	3/83	97/18866	0.00899559	0.0524956	0.0360515	MAPK3/DUSP1/IL6	3
BP	GO:0006536	glutamate metabolic process	2/83	33/18866	0.00924232	0.0530161	0.036409	GLS2/SLC7A11	2
BP	GO:0010039	response to iron ion	2/83	33/18866	0.00924232	0.0530161	0.036409	G6PD/HAMP	2
BP	GO:0048011	neurotrophin TRK receptor signaling pathway	2/83	33/18866	0.00924232	0.0530161	0.036409	DDIT4/SRC	2
BP	GO:0048384	retinoic acid receptor signaling pathway	2/83	33/18866	0.00924232	0.0530161	0.036409	AKR1C3/PML	2
BP	GO:1902745	positive regulation of lamellipodium organization	2/83	33/18866	0.00924232	0.0530161	0.036409	SRC/ENPP2	2
BP	GO:1904893	negative regulation of receptor signaling pathway via STAT	2/83	33/18866	0.00924232	0.0530161	0.036409	NF2/CAV1	2
BP	GO:2000758	positive regulation of peptidyl-lysine acetylation	2/83	33/18866	0.00924232	0.0530161	0.036409	MAPK3/PRKAA2	2
BP	GO:0010657	muscle cell apoptotic process	3/83	98/18866	0.00925064	0.0530161	0.036409	ALOX12/CDKN2A/HSF1	3
BP	GO:2001243	negative regulation of intrinsic apoptotic signaling pathway	3/83	98/18866	0.00925064	0.0530161	0.036409	PTGS2/HSPB1/SRC	3
BP	GO:0060537	muscle tissue development	6/83	409/18866	0.00929664	0.0531738	0.0365173	NOX4/G6PD/ATF3/TAZ/HAMP/CAV1	6
BP	GO:0043409	negative regulation of MAPK cascade	4/83	187/18866	0.0093498	0.0532661	0.0365807	ATF3/DUSP1/NF2/CAV1	4
BP	GO:0045333	cellular respiration	4/83	187/18866	0.0093498	0.0532661	0.0365807	CS/TAZ/NOS2/AIFM2	4
BP	GO:0002702	positive regulation of production of molecular mediator of immune response	3/83	100/18866	0.00977337	0.0549161	0.0377138	TFRC/SLC7A5/IL6	3
BP	GO:0000737	DNA catabolic process, endonucleolytic	2/83	34/18866	0.00979214	0.0549161	0.0377138	IL6/HSF1	2
BP	GO:0032148	activation of protein kinase B activity	2/83	34/18866	0.00979214	0.0549161	0.0377138	MT3/SRC	2
BP	GO:0035633	maintenance of blood-brain barrier	2/83	34/18866	0.00979214	0.0549161	0.0377138	PTGS2/IL6	2
BP	GO:0043276	anoikis	2/83	34/18866	0.00979214	0.0549161	0.0377138	SRC/CAV1	2
BP	GO:0045907	positive regulation of vasoconstriction	2/83	34/18866	0.00979214	0.0549161	0.0377138	PTGS2/CAV1	2
BP	GO:0046685	response to arsenic-containing substance	2/83	34/18866	0.00979214	0.0549161	0.0377138	ATF3/HSF1	2
BP	GO:0070102	interleukin-6-mediated signaling pathway	2/83	34/18866	0.00979214	0.0549161	0.0377138	IL6/SRC	2
BP	GO:0003018	vascular process in circulatory system	4/83	190/18866	0.0098716	0.0551468	0.0378722	ALOX12/PTGS2/SRC/CAV1	4
BP	GO:0030308	negative regulation of cell growth	4/83	190/18866	0.0098716	0.0551468	0.0378722	G6PD/CDKN2A/MT3/PML	4
BP	GO:0019217	regulation of fatty acid metabolic process	3/83	101/18866	0.0100411	0.0557088	0.0382582	PRKAA2/PTGS2/CAV1	3
BP	GO:0032637	interleukin-8 production	3/83	101/18866	0.0100411	0.0557088	0.0382582	NOS2/DDIT3/IL6	3
BP	GO:0044773	mitotic DNA damage checkpoint	3/83	101/18866	0.0100411	0.0557088	0.0382582	AURKA/FANCD2/PML	3
BP	GO:0010821	regulation of mitochondrion organization	4/83	191/18866	0.0100497	0.0557088	0.0382582	TFRC/BAP1/SQSTM1/TP63	4
BP	GO:0110020	regulation of actomyosin structure organization	3/83	102/18866	0.010313	0.0563227	0.0386798	NOX4/STMN1/NF2	3
BP	GO:0006739	NADP metabolic process	2/83	35/18866	0.0103562	0.0563227	0.0386798	NOX1/G6PD	2
BP	GO:0019362	pyridine nucleotide metabolic process	2/83	35/18866	0.0103562	0.0563227	0.0386798	PTGS2/NNMT	2
BP	GO:0030262	apoptotic nuclear changes	2/83	35/18866	0.0103562	0.0563227	0.0386798	IL6/HSF1	2
BP	GO:0032633	interleukin-4 production	2/83	35/18866	0.0103562	0.0563227	0.0386798	DDIT3/SLC7A5	2
BP	GO:0046496	nicotinamide nucleotide metabolic process	2/83	35/18866	0.0103562	0.0563227	0.0386798	PTGS2/NNMT	2
BP	GO:0060251	regulation of glial cell proliferation	2/83	35/18866	0.0103562	0.0563227	0.0386798	MYB/IL6	2
BP	GO:0070306	lens fiber cell differentiation	2/83	35/18866	0.0103562	0.0563227	0.0386798	SLC7A11/NF2	2
BP	GO:0070670	response to interleukin-4	2/83	35/18866	0.0103562	0.0563227	0.0386798	HSPA5/PML	2
BP	GO:0072525	pyridine-containing compound biosynthetic process	2/83	35/18866	0.0103562	0.0563227	0.0386798	PTGS2/NNMT	2
BP	GO:0031098	stress-activated protein kinase signaling cascade	5/83	300/18866	0.0104132	0.0565258	0.0388193	NOX1/HRAS/MAPK3/DUSP1/ZFP36	5
BP	GO:0007162	negative regulation of cell adhesion	5/83	301/18866	0.0105533	0.0568381	0.0390337	ALOX12/CDKN2A/DUSP1/SRC/NF2	5
BP	GO:0010632	regulation of epithelial cell migration	5/83	301/18866	0.0105533	0.0568381	0.0390337	ALOX12/PTGS2/HSPB1/SRC/ENPP2	5
BP	GO:0006885	regulation of pH	3/83	103/18866	0.0105892	0.0568381	0.0390337	NOX1/MAPK3/MAFG	3
BP	GO:0008630	intrinsic apoptotic signaling pathway in response to DNA damage	3/83	103/18866	0.0105892	0.0568381	0.0390337	DDIT4/PML/TP63	3
BP	GO:0034766	negative regulation of ion transmembrane transport	3/83	103/18866	0.0105892	0.0568381	0.0390337	HAMP/DRD4/CAV1	3
BP	GO:0070498	interleukin-1-mediated signaling pathway	3/83	103/18866	0.0105892	0.0568381	0.0390337	MAPK3/IL6/SQSTM1	3
BP	GO:1905475	regulation of protein localization to membrane	4/83	195/18866	0.0107827	0.0577689	0.039673	HRAS/SLC7A11/SQSTM1/TP63	4
BP	GO:0032231	regulation of actin filament bundle assembly	3/83	104/18866	0.0108697	0.0579337	0.0397862	NOX4/STMN1/NF2	3
BP	GO:0032649	regulation of interferon-gamma production	3/83	104/18866	0.0108697	0.0579337	0.0397862	HRAS/DDIT3/SLC7A5	3
BP	GO:0001893	maternal placenta development	2/83	36/18866	0.0109343	0.0579337	0.0397862	MAPK3/PTGS2	2
BP	GO:0033572	transferrin transport	2/83	36/18866	0.0109343	0.0579337	0.0397862	TFRC/STEAP3	2
BP	GO:0034405	response to fluid shear stress	2/83	36/18866	0.0109343	0.0579337	0.0397862	PTGS2/SRC	2
BP	GO:0071634	regulation of transforming growth factor beta production	2/83	36/18866	0.0109343	0.0579337	0.0397862	MYB/PTGS2	2
BP	GO:0071897	DNA biosynthetic process	4/83	196/18866	0.0109712	0.0580226	0.0398472	NOX4/MAPK3/DUSP1/SRC	4
BP	GO:0043588	skin development	6/83	425/18866	0.0110911	0.0585489	0.0402087	ALOX12/ALOX15B/STMN1/AKR1C3/TP63/ZFP36	6
BP	GO:0006816	calcium ion transport	6/83	426/18866	0.0112109	0.0590727	0.0405684	G6PD/PTGS2/DDIT3/DRD4/PML/CAV1	6
BP	GO:0019693	ribose phosphate metabolic process	6/83	427/18866	0.0113316	0.0595994	0.0409301	G6PD/ACSL4/PRKAA2/TAZ/DDIT4/SLC2A6	6
BP	GO:0042063	gliogenesis	5/83	307/18866	0.0114214	0.0599104	0.0411437	MAPK3/MYB/MT3/IL6/NF2	5
BP	GO:2000379	positive regulation of reactive oxygen species metabolic process	3/83	106/18866	0.0114435	0.0599104	0.0411437	NOX4/PTGS2/AKR1C3	3
BP	GO:0045785	positive regulation of cell adhesion	6/83	428/18866	0.0114532	0.0599104	0.0411437	TFRC/ALOX15/MYB/IL6/SRC/CAV1	6
BP	GO:0006882	cellular zinc ion homeostasis	2/83	37/18866	0.0115264	0.0599665	0.0411822	MT3/MT1G	2
BP	GO:0006921	cellular component disassembly involved in execution phase of apoptosis	2/83	37/18866	0.0115264	0.0599665	0.0411822	IL6/HSF1	2
BP	GO:0045730	respiratory burst	2/83	37/18866	0.0115264	0.0599665	0.0411822	NOX1/NCF2	2
BP	GO:0016052	carbohydrate catabolic process	4/83	200/18866	0.0117466	0.060892	0.0418178	PRKAA2/MIOX/DDIT4/SLC2A6	4
BP	GO:0031032	actomyosin structure organization	4/83	200/18866	0.0117466	0.060892	0.0418178	NOX4/STMN1/SRC/NF2	4
BP	GO:0030099	myeloid cell differentiation	6/83	431/18866	0.0118235	0.0611802	0.0420157	G6PD/TFRC/MT1G/SRC/PML/ZFP36	6
BP	GO:0031099	regeneration	4/83	201/18866	0.0119458	0.0616359	0.0423286	IL6/HAMP/NNMT/AURKA	4
BP	GO:0060326	cell chemotaxis	5/83	311/18866	0.0120265	0.0616359	0.0423286	MAPK3/ABCC1/DUSP1/IL6/HSPB1	5
BP	GO:0044774	mitotic DNA integrity checkpoint	3/83	108/18866	0.0120345	0.0616359	0.0423286	AURKA/FANCD2/PML	3
BP	GO:0071887	leukocyte apoptotic process	3/83	108/18866	0.0120345	0.0616359	0.0423286	CDKN2A/SLC7A11/IL6	3
BP	GO:0003298	physiological muscle hypertrophy	2/83	38/18866	0.0121323	0.0616359	0.0423286	G6PD/HAMP	2
BP	GO:0003301	physiological cardiac muscle hypertrophy	2/83	38/18866	0.0121323	0.0616359	0.0423286	G6PD/HAMP	2
BP	GO:0032094	response to food	2/83	38/18866	0.0121323	0.0616359	0.0423286	G6PD/MT3	2
BP	GO:0061049	cell growth involved in cardiac muscle cell development	2/83	38/18866	0.0121323	0.0616359	0.0423286	G6PD/HAMP	2
BP	GO:0071604	transforming growth factor beta production	2/83	38/18866	0.0121323	0.0616359	0.0423286	MYB/PTGS2	2
BP	GO:1905898	positive regulation of response to endoplasmic reticulum stress	2/83	38/18866	0.0121323	0.0616359	0.0423286	DDIT3/CAV1	2
BP	GO:0007179	transforming growth factor beta receptor signaling pathway	4/83	202/18866	0.0121472	0.0616359	0.0423286	HSPA5/SRC/PML/CAV1	4
BP	GO:0007015	actin filament organization	6/83	434/18866	0.0122022	0.061806	0.0424455	NOX4/ALOX15/STMN1/CAPG/SRC/NF2	6
BP	GO:0018958	phenol-containing compound metabolic process	3/83	109/18866	0.0123365	0.0623762	0.0428371	DUOX1/SLC7A11/DRD4	3
BP	GO:0046879	hormone secretion	5/83	314/18866	0.0124944	0.0630639	0.0433093	ACSL4/MYB/NOS2/IL6/SLC2A1	5
BP	GO:1904659	glucose transmembrane transport	3/83	110/18866	0.0126428	0.0635829	0.0436658	SLC2A1/SLC2A6/SLC2A14	3
BP	GO:0010837	regulation of keratinocyte proliferation	2/83	39/18866	0.0127519	0.0635829	0.0436658	TP63/ZFP36	2
BP	GO:0033146	regulation of intracellular estrogen receptor signaling pathway	2/83	39/18866	0.0127519	0.0635829	0.0436658	SRC/TP63	2
BP	GO:0038179	neurotrophin signaling pathway	2/83	39/18866	0.0127519	0.0635829	0.0436658	DDIT4/SRC	2
BP	GO:0045022	early endosome to late endosome transport	2/83	39/18866	0.0127519	0.0635829	0.0436658	MAPK3/SRC	2
BP	GO:0055069	zinc ion homeostasis	2/83	39/18866	0.0127519	0.0635829	0.0436658	MT3/MT1G	2
BP	GO:2000279	negative regulation of DNA biosynthetic process	2/83	39/18866	0.0127519	0.0635829	0.0436658	DUSP1/SRC	2
BP	GO:0002526	acute inflammatory response	3/83	111/18866	0.0129535	0.0643646	0.0442026	PTGS2/IL6/HAMP	3
BP	GO:0034440	lipid oxidation	3/83	111/18866	0.0129535	0.0643646	0.0442026	ALOX12/ALOX15/ALOX15B	3
BP	GO:0006163	purine nucleotide metabolic process	6/83	442/18866	0.0132541	0.0657447	0.0451504	ACSL4/PRKAA2/TAZ/NOS2/DDIT4/SLC2A6	6
BP	GO:0009416	response to light stimulus	5/83	319/18866	0.0133016	0.0657945	0.0451846	PTGS2/DUSP1/SLC7A11/ASNS/PML	5
BP	GO:0000096	sulfur amino acid metabolic process	2/83	40/18866	0.0133851	0.0657945	0.0451846	NOX4/SLC7A11	2
BP	GO:0010939	regulation of necrotic cell death	2/83	40/18866	0.0133851	0.0657945	0.0451846	MT3/CAV1	2
BP	GO:0050892	intestinal absorption	2/83	40/18866	0.0133851	0.0657945	0.0451846	HAMP/AKR1C1	2
BP	GO:0140353	lipid export from cell	2/83	40/18866	0.0133851	0.0657945	0.0451846	MYB/NOS2	2
BP	GO:0071456	cellular response to hypoxia	4/83	208/18866	0.0134013	0.0657945	0.0451846	EGLN2/PTGS2/MT3/SRC	4
BP	GO:0002223	stimulatory C-type lectin receptor signaling pathway	3/83	113/18866	0.0135878	0.0665966	0.0457354	NRAS/HRAS/SRC	3
BP	GO:0006109	regulation of carbohydrate metabolic process	4/83	210/18866	0.013837	0.0675875	0.046416	PRKAA2/DDIT4/SLC2A6/SRC	4
BP	GO:0030100	regulation of endocytosis	4/83	210/18866	0.013837	0.0675875	0.046416	ALOX15/DRD4/SRC/CAV1	4
BP	GO:0008645	hexose transmembrane transport	3/83	114/18866	0.0139116	0.0676204	0.0464386	SLC2A1/SLC2A6/SLC2A14	3
BP	GO:0030004	cellular monovalent inorganic cation homeostasis	3/83	114/18866	0.0139116	0.0676204	0.0464386	NOX1/MAPK3/MAFG	3
BP	GO:0009895	negative regulation of catabolic process	5/83	323/18866	0.0139722	0.0676204	0.0464386	NOS2/MT3/DDIT4/PML/ZFP36	5
BP	GO:0002251	organ or tissue specific immune response	2/83	41/18866	0.0140318	0.0676204	0.0464386	NOS2/IL6	2
BP	GO:0033574	response to testosterone	2/83	41/18866	0.0140318	0.0676204	0.0464386	DUSP1/HSF1	2
BP	GO:0051354	negative regulation of oxidoreductase activity	2/83	41/18866	0.0140318	0.0676204	0.0464386	MT3/CAV1	2
BP	GO:0072524	pyridine-containing compound metabolic process	2/83	41/18866	0.0140318	0.0676204	0.0464386	PTGS2/NNMT	2
BP	GO:1900117	regulation of execution phase of apoptosis	2/83	41/18866	0.0140318	0.0676204	0.0464386	IL6/HSF1	2
BP	GO:0070555	response to interleukin-1	4/83	211/18866	0.0140582	0.0676345	0.0464482	MAPK3/IL6/SQSTM1/SRC	4
BP	GO:0006096	glycolytic process	3/83	115/18866	0.0142397	0.0681656	0.046813	PRKAA2/DDIT4/SLC2A6	3
BP	GO:0031623	receptor internalization	3/83	115/18866	0.0142397	0.0681656	0.046813	TFRC/DRD4/CAV1	3
BP	GO:0032609	interferon-gamma production	3/83	115/18866	0.0142397	0.0681656	0.046813	HRAS/DDIT3/SLC7A5	3
BP	GO:1901215	negative regulation of neuron death	4/83	212/18866	0.0142816	0.0682529	0.0468729	HRAS/MT3/SLC7A11/HSF1	4
BP	GO:0030073	insulin secretion	4/83	213/18866	0.0145073	0.068617	0.0471229	ACSL4/NOS2/IL6/SLC2A1	4
BP	GO:0090276	regulation of peptide hormone secretion	4/83	213/18866	0.0145073	0.068617	0.0471229	ACSL4/NOS2/IL6/SLC2A1	4
BP	GO:0002220	innate immune response activating cell surface receptor signaling pathway	3/83	116/18866	0.0145722	0.068617	0.0471229	NRAS/HRAS/SRC	3
BP	GO:0006757	ATP generation from ADP	3/83	116/18866	0.0145722	0.068617	0.0471229	PRKAA2/DDIT4/SLC2A6	3
BP	GO:0015749	monosaccharide transmembrane transport	3/83	116/18866	0.0145722	0.068617	0.0471229	SLC2A1/SLC2A6/SLC2A14	3
BP	GO:0030518	intracellular steroid hormone receptor signaling pathway	3/83	116/18866	0.0145722	0.068617	0.0471229	EGLN2/SRC/TP63	3
BP	GO:0001504	neurotransmitter uptake	2/83	42/18866	0.0146917	0.068617	0.0471229	SLC38A1/DRD4	2
BP	GO:0009268	response to pH	2/83	42/18866	0.0146917	0.068617	0.0471229	NOX1/SRC	2
BP	GO:0051602	response to electrical stimulus	2/83	42/18866	0.0146917	0.068617	0.0471229	NQO1/SRC	2
BP	GO:0071470	cellular response to osmotic stress	2/83	42/18866	0.0146917	0.068617	0.0471229	PTGS2/SLC2A1	2
BP	GO:0072595	maintenance of protein localization in organelle	2/83	42/18866	0.0146917	0.068617	0.0471229	HSPA5/PML	2
BP	GO:0098927	vesicle-mediated transport between endosomal compartments	2/83	42/18866	0.0146917	0.068617	0.0471229	MAPK3/SRC	2
BP	GO:1900371	regulation of purine nucleotide biosynthetic process	2/83	42/18866	0.0146917	0.068617	0.0471229	TAZ/NOS2	2
BP	GO:1904037	positive regulation of epithelial cell apoptotic process	2/83	42/18866	0.0146917	0.068617	0.0471229	IL6/AKR1C3	2
BP	GO:0002758	innate immune response-activating signal transduction	3/83	117/18866	0.014909	0.0694066	0.0476652	NRAS/HRAS/SRC	3
BP	GO:1904019	epithelial cell apoptotic process	3/83	117/18866	0.014909	0.0694066	0.0476652	IL6/AKR1C3/ZFP36	3
BP	GO:0050804	modulation of chemical synaptic transmission	6/83	454/18866	0.0149491	0.0694806	0.047716	HRAS/PTGS2/SLC7A11/DRD4/SQSTM1/SRC	6
BP	GO:1903037	regulation of leukocyte cell-cell adhesion	5/83	329/18866	0.0150204	0.0696995	0.0478664	TFRC/MYB/IL6/SRC/CAV1	5
BP	GO:0099177	regulation of trans-synaptic signaling	6/83	455/18866	0.0150968	0.0699414	0.0480325	HRAS/PTGS2/SLC7A11/DRD4/SQSTM1/SRC	6
BP	GO:0034219	carbohydrate transmembrane transport	3/83	118/18866	0.0152503	0.0705388	0.0484428	SLC2A1/SLC2A6/SLC2A14	3
BP	GO:0006308	DNA catabolic process	2/83	43/18866	0.0153648	0.0706145	0.0484947	IL6/HSF1	2
BP	GO:0021762	substantia nigra development	2/83	43/18866	0.0153648	0.0706145	0.0484947	G6PD/HSPA5	2
BP	GO:0030808	regulation of nucleotide biosynthetic process	2/83	43/18866	0.0153648	0.0706145	0.0484947	TAZ/NOS2	2
BP	GO:0150077	regulation of neuroinflammatory response	2/83	43/18866	0.0153648	0.0706145	0.0484947	PTGS2/IL6	2
BP	GO:0010810	regulation of cell-substrate adhesion	4/83	217/18866	0.0154326	0.0708129	0.048631	ALOX15/CDKN2A/SRC/NF2	4
BP	GO:0046660	female sex differentiation	3/83	119/18866	0.015596	0.0714447	0.0490649	HSPA5/SRC/TP63	3
BP	GO:0006338	chromatin remodeling	4/83	218/18866	0.0156697	0.0714447	0.0490649	CDKN2A/MYB/HELLS/TP63	4
BP	GO:0007623	circadian rhythm	4/83	218/18866	0.0156697	0.0714447	0.0490649	PRKAA2/NOS2/DRD4/PML	4
BP	GO:0036294	cellular response to decreased oxygen levels	4/83	218/18866	0.0156697	0.0714447	0.0490649	EGLN2/PTGS2/MT3/SRC	4
CC	GO:0043020	NADPH oxidase complex	4/84	12/19559	1.52624e-07	3.35772e-05	2.6187e-05	NOX1/NOX4/DUOX1/NCF2	4
CC	GO:0005767	secondary lysosome	4/84	16/19559	5.53858e-07	6.09244e-05	4.75152e-05	NCF2/FTL/FTH1/SQSTM1	4
CC	GO:0042470	melanosome	6/84	105/19559	6.00093e-06	0.000330051	0.000257408	TFRC/SLC1A5/SLC1A4/SLC2A1/CAPG/HSPA5	6
CC	GO:0048770	pigment granule	6/84	105/19559	6.00093e-06	0.000330051	0.000257408	TFRC/SLC1A5/SLC1A4/SLC2A1/CAPG/HSPA5	6
CC	GO:0044754	autolysosome	3/84	10/19559	8.97275e-06	0.000394801	0.000307907	FTL/FTH1/SQSTM1	3
CC	GO:0005901	caveola	5/84	82/19559	2.72661e-05	0.000999758	0.000779716	MAPK3/PTGS2/SLC2A1/SRC/CAV1	5
CC	GO:0045120	pronucleus	3/84	16/19559	4.10996e-05	0.0012917	0.0010074	SLC2A1/AURKA/HSF1	3
CC	GO:0005811	lipid droplet	5/84	93/19559	5.0052e-05	0.00137643	0.00107348	ACSL4/ALOX15/PLIN2/AIFM2/CAV1	5
CC	GO:0045177	apical part of cell	9/84	433/19559	9.97186e-05	0.00243756	0.00190107	NOX4/DUOX1/SLC38A1/ABCC1/SLC7A11/SLC7A5/HAMP/SLC2A1/NF2	9
CC	GO:1990204	oxidoreductase complex	5/84	110/19559	0.000111339	0.00244945	0.00191034	NOX1/NOX4/DUOX1/NCF2/RRM2	5
CC	GO:0044853	plasma membrane raft	5/84	113/19559	0.000126411	0.00252822	0.00197177	MAPK3/PTGS2/SLC2A1/SRC/CAV1	5
CC	GO:0000792	heterochromatin	4/84	78/19559	0.000354546	0.00650001	0.00506939	CDKN2A/HSF1/HELLS/PML	4
CC	GO:0005925	focal adhesion	8/84	415/19559	0.00040983	0.00693559	0.0054091	RPL8/NOX4/ALOX15B/MAPK3/HSPB1/HSPA5/SRC/CAV1	8
CC	GO:0030055	cell-substrate junction	8/84	423/19559	0.000465049	0.00730792	0.00569948	RPL8/NOX4/ALOX15B/MAPK3/HSPB1/HSPA5/SRC/CAV1	8
CC	GO:0016323	basolateral plasma membrane	6/84	246/19559	0.000667684	0.0097927	0.00763737	TFRC/SLC38A1/SLC1A5/ABCC1/SLC7A5/SLC2A1	6
CC	GO:0009925	basal plasma membrane	3/84	51/19559	0.00137146	0.0188576	0.0147071	SLC1A5/ABCC1/SLC7A5	3
CC	GO:0097449	astrocyte projection	2/84	19/19559	0.00297213	0.0384629	0.0299974	MT3/SLC7A11	2
CC	GO:0045178	basal part of cell	3/84	69/19559	0.00326434	0.0398974	0.0311162	SLC1A5/ABCC1/SLC7A5	3
CC	GO:0016324	apical plasma membrane	6/84	361/19559	0.00460606	0.0507154	0.0395532	NOX4/DUOX1/SLC38A1/ABCC1/SLC7A5/SLC2A1	6
CC	GO:0016234	inclusion body	3/84	78/19559	0.0046105	0.0507154	0.0395532	MIOX/MT3/SQSTM1	3
CC	GO:0005791	rough endoplasmic reticulum	3/84	84/19559	0.0056692	0.0567075	0.0442264	MT3/SLC7A11/TP63	3
CC	GO:0005769	early endosome	6/84	377/19559	0.00567075	0.0567075	0.0442264	NOX1/TFRC/MAPK3/PML/NF2/CAV1	6
MF	GO:0016651	oxidoreductase activity, acting on NAD(P)H	13/84	109/18352	2.41643e-15	8.24001e-13	6.00291e-13	NOX1/NOX4/NOX5/DUOX1/MIOX/NOS2/NCF2/TXNRD1/AKR1C1/AKR1C2/AKR1C3/NQO1/AIFM2	13
MF	GO:0016175	superoxide-generating NAD(P)H oxidase activity	5/84	13/18352	2.22668e-09	3.79649e-07	2.76577e-07	NOX1/NOX4/NOX5/DUOX1/NCF2	5
MF	GO:0016209	antioxidant activity	8/84	86/18352	5.44419e-09	6.18823e-07	4.50817e-07	DUOX1/PTGS2/MT3/ALB/TXNRD1/SRXN1/GPX2/NQO1	8
MF	GO:0050664	oxidoreductase activity, acting on NAD(P)H, oxygen as acceptor	5/84	19/18352	1.9689e-08	1.67848e-06	1.22279e-06	NOX1/NOX4/NOX5/DUOX1/NCF2	5
MF	GO:0016701	oxidoreductase activity, acting on single donors with incorporation of molecular oxygen	5/84	26/18352	1.08616e-07	7.40762e-06	5.39651e-06	ALOX12/ALOX15/ALOX15B/MIOX/PTGS2	5
MF	GO:0008199	ferric iron binding	4/84	11/18352	1.3151e-07	7.47416e-06	5.44498e-06	MIOX/FTL/FTH1/RRM2	4
MF	GO:0015175	neutral amino acid transmembrane transporter activity	5/84	34/18352	4.4645e-07	1.91013e-05	1.39154e-05	SLC38A1/SLC1A5/SLC7A11/SLC1A4/SLC7A5	5
MF	GO:0005506	iron ion binding	8/84	151/18352	4.48124e-07	1.91013e-05	1.39154e-05	ALOX12/ALOX15/ALOX15B/EGLN2/MIOX/FTL/FTH1/RRM2	8
MF	GO:0008514	organic anion transmembrane transporter activity	9/84	233/18352	1.18284e-06	4.48165e-05	3.26491e-05	SLC38A1/SLC1A5/ABCC1/SLC7A11/SLC1A4/SLC7A5/SLC2A1/SLC2A6/SLC2A14	9
MF	GO:0050661	NADP binding	5/84	54/18352	4.72289e-06	0.000148827	0.000108421	NOX1/NOX5/DUOX1/G6PD/NOS2	5
MF	GO:0016702	oxidoreductase activity, acting on single donors with incorporation of molecular oxygen, incorporation of two atoms of oxygen	4/84	25/18352	4.80087e-06	0.000148827	0.000108421	ALOX12/ALOX15/ALOX15B/PTGS2	4
MF	GO:0004033	aldo-keto reductase (NADP) activity	4/84	27/18352	6.61421e-06	0.000187954	0.000136926	MIOX/AKR1C1/AKR1C2/AKR1C3	4
MF	GO:0015179	L-amino acid transmembrane transporter activity	5/84	59/18352	7.34374e-06	0.000192632	0.000140334	SLC38A1/SLC1A5/SLC7A11/SLC1A4/SLC7A5	5
MF	GO:0016655	oxidoreductase activity, acting on NAD(P)H, quinone or similar compound as acceptor	5/84	61/18352	8.66434e-06	0.000200208	0.000145853	AKR1C1/AKR1C2/AKR1C3/NQO1/AIFM2	5
MF	GO:0090482	vitamin transmembrane transporter activity	4/84	29/18352	8.88904e-06	0.000200208	0.000145853	ABCC1/SLC2A1/SLC2A6/SLC2A14	4
MF	GO:0016705	oxidoreductase activity, acting on paired donors, with incorporation or reduction of molecular oxygen	7/84	162/18352	9.39394e-06	0.000200208	0.000145853	EGLN2/PTGS2/NOS2/AKR1C1/AKR1C2/AKR1C3/FADS2	7
MF	GO:0032052	bile acid binding	3/84	10/18352	1.08467e-05	0.000217572	0.000158503	AKR1C1/AKR1C2/AKR1C3	3
MF	GO:0004032	alditol:NADP+ 1-oxidoreductase activity	3/84	12/18352	1.97543e-05	0.000374234	0.000272632	AKR1C1/AKR1C2/AKR1C3	3
MF	GO:0050660	flavin adenine dinucleotide binding	5/84	81/18352	3.47365e-05	0.000598535	0.000436037	NOX4/NOX5/NOS2/TXNRD1/AIFM2	5
MF	GO:0008509	anion transmembrane transporter activity	9/84	357/18352	3.67725e-05	0.000598535	0.000436037	SLC38A1/SLC1A5/ABCC1/SLC7A11/SLC1A4/SLC7A5/SLC2A1/SLC2A6/SLC2A14	9
MF	GO:0015171	amino acid transmembrane transporter activity	5/84	82/18352	3.68599e-05	0.000598535	0.000436037	SLC38A1/SLC1A5/SLC7A11/SLC1A4/SLC7A5	5
MF	GO:0020037	heme binding	6/84	138/18352	4.07251e-05	0.00063124	0.000459863	NOX4/NOX5/DUOX1/PTGS2/NOS2/SRC	6
MF	GO:0015172	acidic amino acid transmembrane transporter activity	3/84	16/18352	4.96223e-05	0.000735705	0.000535966	SLC1A5/SLC7A11/SLC1A4	3
MF	GO:0016709	oxidoreductase activity, acting on paired donors, with incorporation or reduction of molecular oxygen, NAD(P)H as one donor, and incorporation of one atom of oxygen	4/84	45/18352	5.27407e-05	0.000749357	0.000545912	NOS2/AKR1C1/AKR1C2/AKR1C3	4
MF	GO:0046906	tetrapyrrole binding	6/84	148/18352	6.02072e-05	0.000797846	0.000581237	NOX4/NOX5/DUOX1/PTGS2/NOS2/SRC	6
MF	GO:0051213	dioxygenase activity	5/84	91/18352	6.08328e-05	0.000797846	0.000581237	ALOX12/ALOX15/ALOX15B/EGLN2/PTGS2	5
MF	GO:0016722	oxidoreductase activity, oxidizing metal ions	3/84	19/18352	8.50164e-05	0.00107373	0.000782217	NOX5/FTH1/STEAP3	3
MF	GO:0072349	modified amino acid transmembrane transporter activity	3/84	20/18352	9.96891e-05	0.00121407	0.00088446	ABCC1/SLC7A11/SLC1A4	3
MF	GO:0005355	glucose transmembrane transporter activity	3/84	21/18352	0.00011592	0.00127512	0.000928935	SLC2A1/SLC2A6/SLC2A14	3
MF	GO:0008106	alcohol dehydrogenase (NADP+) activity	3/84	21/18352	0.00011592	0.00127512	0.000928935	AKR1C1/AKR1C2/AKR1C3	3
MF	GO:0015149	hexose transmembrane transporter activity	3/84	21/18352	0.00011592	0.00127512	0.000928935	SLC2A1/SLC2A6/SLC2A14	3
MF	GO:0015145	monosaccharide transmembrane transporter activity	3/84	23/18352	0.00015334	0.00161291	0.00117502	SLC2A1/SLC2A6/SLC2A14	3
MF	GO:0009055	electron transfer activity	5/84	111/18352	0.000156088	0.00161291	0.00117502	NOX4/NCF2/TXNRD1/GPX2/AIFM2	5
MF	GO:0051119	sugar transmembrane transporter activity	3/84	25/18352	0.000197831	0.00198413	0.00144545	SLC2A1/SLC2A6/SLC2A14	3
MF	GO:0008198	ferrous iron binding	3/84	26/18352	0.000222897	0.00207144	0.00150906	EGLN2/FTL/FTH1	3
MF	GO:0016628	oxidoreductase activity, acting on the CH-CH group of donors, NAD or NADP as acceptor	3/84	26/18352	0.000222897	0.00207144	0.00150906	AKR1C1/AKR1C2/AKR1C3	3
MF	GO:0016616	oxidoreductase activity, acting on the CH-OH group of donors, NAD or NADP as acceptor	5/84	120/18352	0.00022476	0.00207144	0.00150906	G6PD/MIOX/AKR1C1/AKR1C2/AKR1C3	5
MF	GO:0042910	xenobiotic transmembrane transporter activity	3/84	27/18352	0.000249933	0.00224282	0.00163391	ABCC1/SLC7A5/SLC2A1	3
MF	GO:0016614	oxidoreductase activity, acting on CH-OH group of donors	5/84	130/18352	0.000325752	0.00282653	0.00205915	G6PD/MIOX/AKR1C1/AKR1C2/AKR1C3	5
MF	GO:0033293	monocarboxylic acid binding	4/84	72/18352	0.000331557	0.00282653	0.00205915	ALB/AKR1C1/AKR1C2/AKR1C3	4
MF	GO:0033764	steroid dehydrogenase activity, acting on the CH-OH group of donors, NAD or NADP as acceptor	3/84	30/18352	0.000343496	0.00285689	0.00208126	AKR1C1/AKR1C2/AKR1C3	3
MF	GO:0031406	carboxylic acid binding	6/84	212/18352	0.000425405	0.00345389	0.00251618	EGLN2/NOS2/ALB/AKR1C1/AKR1C2/AKR1C3	6
MF	GO:0016229	steroid dehydrogenase activity	3/84	34/18352	0.000499639	0.00396226	0.00288653	AKR1C1/AKR1C2/AKR1C3	3
MF	GO:0043177	organic acid binding	6/84	224/18352	0.000568943	0.00440931	0.00321221	EGLN2/NOS2/ALB/AKR1C1/AKR1C2/AKR1C3	6
MF	GO:0019825	oxygen binding	3/84	36/18352	0.000592242	0.00448788	0.00326945	NOX4/EGLN2/ALB	3
MF	GO:0015144	carbohydrate transmembrane transporter activity	3/84	37/18352	0.000642377	0.00476197	0.00346913	SLC2A1/SLC2A6/SLC2A14	3
MF	GO:0005310	dicarboxylic acid transmembrane transporter activity	3/84	39/18352	0.000750595	0.0054458	0.00396731	SLC1A5/SLC7A11/SLC1A4	3
MF	GO:0046943	carboxylic acid transmembrane transporter activity	5/84	162/18352	0.000887099	0.0062193	0.00453081	SLC38A1/SLC1A5/SLC7A11/SLC1A4/SLC7A5	5
MF	GO:0016803	ether hydrolase activity	2/84	10/18352	0.000909647	0.0062193	0.00453081	ALOX12/ALOX15	2
MF	GO:0005342	organic acid transmembrane transporter activity	5/84	163/18352	0.000911921	0.0062193	0.00453081	SLC38A1/SLC1A5/SLC7A11/SLC1A4/SLC7A5	5
MF	GO:1901682	sulfur compound transmembrane transporter activity	3/84	42/18352	0.000933592	0.00624225	0.00454753	ABCC1/SLC7A11/SLC1A4	3
MF	GO:0016801	hydrolase activity, acting on ether bonds	2/84	11/18352	0.00110849	0.00713197	0.00519569	ALOX12/ALOX15	2
MF	GO:0140299	small molecule sensor activity	2/84	11/18352	0.00110849	0.00713197	0.00519569	NOX4/EGLN2	2
MF	GO:0004712	protein serine/threonine/tyrosine kinase activity	3/84	45/18352	0.00114264	0.00721554	0.00525658	MAPK3/PRKAA2/AURKA	3
MF	GO:0004497	monooxygenase activity	4/84	101/18352	0.00119009	0.00737855	0.00537533	NOS2/AKR1C1/AKR1C2/AKR1C3	4
MF	GO:0005496	steroid binding	4/84	106/18352	0.00142317	0.00866607	0.0063133	AKR1C1/AKR1C2/AKR1C3/CAV1	4
MF	GO:0016653	oxidoreductase activity, acting on NAD(P)H, heme protein as acceptor	2/84	13/18352	0.00156271	0.00934887	0.00681072	NOS2/NQO1	2
MF	GO:0004601	peroxidase activity	3/84	52/18352	0.00173908	0.0102246	0.00744869	DUOX1/PTGS2/GPX2	3
MF	GO:0005080	protein kinase C binding	3/84	55/18352	0.00204422	0.0118149	0.00860723	HSPB1/SQSTM1/SRC	3
MF	GO:0016684	oxidoreductase activity, acting on peroxide as acceptor	3/84	56/18352	0.00215284	0.0122353	0.00891353	DUOX1/PTGS2/GPX2	3
MF	GO:0015556	C4-dicarboxylate transmembrane transporter activity	2/84	16/18352	0.00238284	0.0133205	0.00970405	SLC1A5/SLC1A4	2
MF	GO:0016627	oxidoreductase activity, acting on the CH-CH group of donors	3/84	59/18352	0.00250003	0.0137502	0.0100171	AKR1C1/AKR1C2/AKR1C3	3
MF	GO:0035173	histone kinase activity	2/84	17/18352	0.00269254	0.0145739	0.0106172	PRKAA2/AURKA	2
MF	GO:0031072	heat shock protein binding	4/84	127/18352	0.00275369	0.014672	0.0106887	DNAJB6/HSF1/HSPA5/ZFP36	4
MF	GO:0046982	protein heterodimerization activity	6/84	321/18352	0.00354233	0.0185836	0.0135383	ATF3/DDIT3/MAFG/AURKA/HSF1/CAV1	6
MF	GO:0015291	secondary active transmembrane transporter activity	5/84	236/18352	0.00456508	0.0232516	0.016939	SLC38A1/SLC1A5/SLC7A11/SLC1A4/SLC7A5	5
MF	GO:0048365	Rac GTPase binding	3/84	73/18352	0.0045685	0.0232516	0.016939	NOX1/NCF2/CAV1	3
MF	GO:0022804	active transmembrane transporter activity	6/84	344/18352	0.00495445	0.0248451	0.0180998	SLC38A1/SLC1A5/ABCC1/SLC7A11/SLC1A4/SLC7A5	6
MF	GO:0044183	protein folding chaperone	2/84	27/18352	0.00674618	0.0333398	0.0242883	HSPB1/HSPA5	2
MF	GO:0030291	protein serine/threonine kinase inhibitor activity	2/84	31/18352	0.00883217	0.0430253	0.0313442	CDKN2A/HSPB1	2
MF	GO:0032182	ubiquitin-like protein binding	3/84	94/18352	0.00919315	0.044153	0.0321658	HSPB1/SQSTM1/PML	3
MF	GO:0071889	14-3-3 protein binding	2/84	32/18352	0.00939319	0.0444872	0.0324092	DDIT4/ZFP36	2
MF	GO:0031625	ubiquitin protein ligase binding	5/84	297/18352	0.0117218	0.0547554	0.0398897	AURKA/SQSTM1/HSPA5/SRC/PML	5
MF	GO:0008144	drug binding	3/84	104/18352	0.0120891	0.0549649	0.0400424	MT3/ALB/DRD4	3
MF	GO:0051087	chaperone binding	3/84	104/18352	0.0120891	0.0549649	0.0400424	DNAJB6/ALB/HSPA5	3
MF	GO:0044389	ubiquitin-like protein ligase binding	5/84	316/18352	0.0149801	0.0669701	0.0487882	AURKA/SQSTM1/HSPA5/SRC/PML	5
MF	GO:0042169	SH2 domain binding	2/84	41/18352	0.0151223	0.0669701	0.0487882	SQSTM1/SRC	2
KEGG	hsa04216	Ferroptosis	7/69	41/8108	4.23405e-08	9.27256e-06	6.32879e-06	ACSL4/TFRC/ALOX15/SLC7A11/FTL/FTH1/STEAP3	7
KEGG	hsa05230	Central carbon metabolism in cancer	8/69	70/8108	1.12718e-07	1.23426e-05	8.42418e-06	G6PD/NRAS/HRAS/SLC1A5/GLS2/MAPK3/SLC7A5/SLC2A1	8
KEGG	hsa04726	Serotonergic synapse	8/69	115/8108	5.21731e-06	0.000380863	0.00025995	NRAS/HRAS/ALOX12/ALOX15/ALOX15B/MAPK3/PTGS2/DUSP1	8
KEGG	hsa04370	VEGF signaling pathway	6/69	59/8108	9.62445e-06	0.000512599	0.000349864	NRAS/HRAS/MAPK3/PTGS2/HSPB1/SRC	6
KEGG	hsa00590	Arachidonic acid metabolism	6/69	61/8108	1.17032e-05	0.000512599	0.000349864	ALOX12/ALOX15/ALOX15B/PTGS2/GPX2/AKR1C3	6
KEGG	hsa05418	Fluid shear stress and atherosclerosis	8/69	139/8108	2.11266e-05	0.000712571	0.00048635	NOX1/PRKAA2/DUSP1/NCF2/SQSTM1/NQO1/SRC/CAV1	8
KEGG	hsa05219	Bladder cancer	5/69	41/8108	2.27763e-05	0.000712571	0.00048635	NRAS/HRAS/MAPK3/CDKN2A/SRC	5
KEGG	hsa05417	Lipid and atherosclerosis	9/69	215/8108	7.80694e-05	0.00213715	0.00145867	NOX1/NRAS/HRAS/MAPK3/NCF2/DDIT3/IL6/HSPA5/SRC	9
KEGG	hsa04933	AGE-RAGE signaling pathway in diabetic complications	6/69	100/8108	0.000193725	0.00471397	0.00321742	NOX1/NOX4/NRAS/HRAS/MAPK3/IL6	6
KEGG	hsa04625	C-type lectin receptor signaling pathway	6/69	104/8108	0.000240113	0.00518569	0.00353938	NRAS/HRAS/MAPK3/PTGS2/IL6/SRC	6
KEGG	hsa05206	MicroRNAs in cancer	10/69	310/8108	0.000264443	0.00518569	0.00353938	NRAS/HRAS/GLS2/MAPK3/CDKN2A/ABCC1/PTGS2/DDIT4/STMN1/TP63	10
KEGG	hsa05211	Renal cell carcinoma	5/69	69/8108	0.000284148	0.00518569	0.00353938	NRAS/HRAS/MAPK3/EGLN2/SLC2A1	5
KEGG	hsa04066	HIF-1 signaling pathway	6/69	109/8108	0.000309952	0.0052215	0.00356382	TFRC/MAPK3/EGLN2/NOS2/IL6/SLC2A1	6
KEGG	hsa01521	EGFR tyrosine kinase inhibitor resistance	5/69	79/8108	0.000533641	0.00834768	0.00569753	NRAS/HRAS/MAPK3/IL6/SRC	5
KEGG	hsa05022	Pathways of neurodegeneration - multiple diseases	12/69	476/8108	0.000598778	0.00874215	0.00596677	NOX1/NOX4/NRAS/HRAS/MAPK3/PTGS2/NOS2/GPX2/DDIT3/IL6/SQSTM1/HSPA5	12
KEGG	hsa04140	Autophagy - animal	6/69	141/8108	0.0012123	0.0159775	0.0109051	NRAS/HRAS/MAPK3/PRKAA2/DDIT4/SQSTM1	6
KEGG	hsa05167	Kaposi sarcoma-associated herpesvirus infection	7/69	194/8108	0.00124026	0.0159775	0.0109051	NRAS/HRAS/MAPK3/PTGS2/IL6/SRC/ZFP36	7
KEGG	hsa01522	Endocrine resistance	5/69	98/8108	0.00141983	0.0172746	0.0117904	NRAS/HRAS/MAPK3/CDKN2A/SRC	5
KEGG	hsa04921	Oxytocin signaling pathway	6/69	154/8108	0.00190515	0.0212113	0.0144773	NRAS/HRAS/MAPK3/PRKAA2/PTGS2/SRC	6
KEGG	hsa04150	mTOR signaling pathway	6/69	155/8108	0.00196875	0.0212113	0.0144773	NRAS/HRAS/MAPK3/PRKAA2/DDIT4/SLC7A5	6
KEGG	hsa04218	Cellular senescence	6/69	156/8108	0.00203396	0.0212113	0.0144773	NRAS/HRAS/MAPK3/CDKN2A/IL6/SQSTM1	6
KEGG	hsa01523	Antifolate resistance	3/69	31/8108	0.00223567	0.0222551	0.0151897	ALOX12/ABCC1/IL6	3
KEGG	hsa05221	Acute myeloid leukemia	4/69	67/8108	0.00246028	0.0226465	0.0154569	NRAS/HRAS/MAPK3/PML	4
KEGG	hsa05166	Human T-cell leukemia virus 1 infection	7/69	219/8108	0.00248181	0.0226465	0.0154569	NRAS/HRAS/MAPK3/CDKN2A/IL6/SLC2A1/ZFP36	7
KEGG	hsa04917	Prolactin signaling pathway	4/69	70/8108	0.00288745	0.0230194	0.0157114	NRAS/HRAS/MAPK3/SRC	4
KEGG	hsa05163	Human cytomegalovirus infection	7/69	225/8108	0.00288819	0.0230194	0.0157114	NRAS/HRAS/MAPK3/CDKN2A/PTGS2/IL6/SRC	7
KEGG	hsa05225	Hepatocellular carcinoma	6/69	168/8108	0.00295074	0.0230194	0.0157114	NRAS/HRAS/MAPK3/CDKN2A/TXNRD1/NQO1	6
KEGG	hsa04137	Mitophagy - animal	4/69	72/8108	0.00319889	0.0230194	0.0157114	NRAS/HRAS/SQSTM1/SRC	4
KEGG	hsa05218	Melanoma	4/69	72/8108	0.00319889	0.0230194	0.0157114	NRAS/HRAS/MAPK3/CDKN2A	4
KEGG	hsa05223	Non-small cell lung cancer	4/69	72/8108	0.00319889	0.0230194	0.0157114	NRAS/HRAS/MAPK3/CDKN2A	4
KEGG	hsa04115	p53 signaling pathway	4/69	73/8108	0.00336288	0.0230194	0.0157114	CDKN2A/STEAP3/RRM2/AIFM2	4
KEGG	hsa04919	Thyroid hormone signaling pathway	5/69	121/8108	0.00357632	0.0230194	0.0157114	NRAS/HRAS/MAPK3/SLC2A1/SRC	5
KEGG	hsa04918	Thyroid hormone synthesis	4/69	75/8108	0.00370791	0.0230194	0.0157114	DUOX1/ALB/GPX2/HSPA5	4
KEGG	hsa05214	Glioma	4/69	75/8108	0.00370791	0.0230194	0.0157114	NRAS/HRAS/MAPK3/CDKN2A	4
KEGG	hsa05216	Thyroid cancer	3/69	37/8108	0.00372643	0.0230194	0.0157114	NRAS/HRAS/MAPK3	3
KEGG	hsa05010	Alzheimer disease	9/69	369/8108	0.0038336	0.0230194	0.0157114	NOX1/NOX4/NRAS/HRAS/MAPK3/PTGS2/NOS2/DDIT3/IL6	9
KEGG	hsa05220	Chronic myeloid leukemia	4/69	76/8108	0.00388911	0.0230194	0.0157114	NRAS/HRAS/MAPK3/CDKN2A	4
KEGG	hsa05140	Leishmaniasis	4/69	77/8108	0.00407624	0.023492	0.016034	MAPK3/PTGS2/NOS2/NCF2	4
KEGG	hsa04926	Relaxin signaling pathway	5/69	129/8108	0.00469984	0.0263914	0.0180129	NRAS/HRAS/MAPK3/NOS2/SRC	5
KEGG	hsa04068	FoxO signaling pathway	5/69	131/8108	0.005016	0.0274626	0.018744	NRAS/HRAS/MAPK3/PRKAA2/IL6	5
KEGG	hsa04012	ErbB signaling pathway	4/69	85/8108	0.00579704	0.0309647	0.0211343	NRAS/HRAS/MAPK3/SRC	4
KEGG	hsa04371	Apelin signaling pathway	5/69	137/8108	0.00605505	0.0315727	0.0215493	NRAS/HRAS/MAPK3/PRKAA2/NOS2	5
KEGG	hsa04540	Gap junction	4/69	88/8108	0.00655055	0.0333621	0.0227706	NRAS/HRAS/MAPK3/SRC	4
KEGG	hsa04912	GnRH signaling pathway	4/69	93/8108	0.00794624	0.0395506	0.0269944	NRAS/HRAS/MAPK3/SRC	4
KEGG	hsa05161	Hepatitis B	5/69	162/8108	0.012037	0.0576625	0.0393563	NRAS/HRAS/MAPK3/IL6/SRC	5
KEGG	hsa04010	MAPK signaling pathway	7/69	294/8108	0.0121118	0.0576625	0.0393563	NRAS/HRAS/MAPK3/DUSP1/DDIT3/HSPB1/STMN1	7
KEGG	hsa00480	Glutathione metabolism	3/69	57/8108	0.0124364	0.0579486	0.0395515	G6PD/GPX2/RRM2	3
KEGG	hsa05213	Endometrial cancer	3/69	58/8108	0.0130361	0.0594774	0.040595	NRAS/HRAS/MAPK3	3
KEGG	hsa04730	Long-term depression	3/69	60/8108	0.0142845	0.0625663	0.0427033	NRAS/HRAS/MAPK3	3
KEGG	hsa04978	Mineral absorption	3/69	60/8108	0.0142845	0.0625663	0.0427033	FTL/FTH1/MT1G	3
KEGG	hsa00220	Arginine biosynthesis	2/69	22/8108	0.0147734	0.0628925	0.0429259	GLS2/NOS2	2
KEGG	hsa00140	Steroid hormone biosynthesis	3/69	61/8108	0.0149334	0.0628925	0.0429259	AKR1C1/AKR1C2/AKR1C3	3
KEGG	hsa04213	Longevity regulating pathway - multiple species	3/69	62/8108	0.0155987	0.0644551	0.0439924	NRAS/HRAS/PRKAA2	3
KEGG	hsa04929	GnRH secretion	3/69	64/8108	0.016979	0.0688594	0.0469985	NRAS/HRAS/MAPK3	3
KEGG	hsa04071	Sphingolipid signaling pathway	4/69	119/8108	0.0183407	0.0730295	0.0498447	NRAS/HRAS/MAPK3/ABCC1	4

## Sheet: Supplementary Table 5
Supplementary Table 5. 781 ferroptosis-associated lncRNAs.
gene	conMean	treatMean	logFC	pValue	fdr
LINC01521	0.10253	0.284007	1.46988	2.91595e-09	5.26339e-09
AC068580.3	0.311359	1.01724	1.708	3.08992e-14	9.35945e-14
AC022306.3	0.07526	0.299897	1.99451	1.97302e-14	6.1052e-14
YTHDF3-AS1	0.868331	2.10572	1.27799	1.34286e-10	2.69512e-10
PANK2-AS1	0.23517	0.654008	1.4756	4.42635e-13	1.18725e-12
LINC00106	0.37402	1.6431	2.13523	1.19551e-15	4.17157e-15
AC124045.1	0.0920602	0.232465	1.33636	4.51772e-08	7.40907e-08
AC005261.3	1.47734	2.97379	1.00929	9.38809e-18	4.25989e-17
AC132872.1	0.521036	1.94246	1.89843	1.87286e-23	4.3001e-22
SUV39H2-DT	0.146325	0.604259	2.04599	4.08833e-24	1.20321e-22
AC026803.1	0.108199	0.254548	1.23425	7.93054e-05	0.000103693
AC024075.3	0.173249	0.468942	1.43656	1.20414e-13	3.40482e-13
AC092115.3	0.0110219	0.232417	4.39827	3.48671e-08	5.78431e-08
LINC00957	0.319173	0.731721	1.19696	3.94544e-08	6.50772e-08
AC004241.3	0.190519	0.389007	1.02986	5.65479e-08	9.24743e-08
SLC30A6-DT	0.0407781	0.23355	2.51786	2.33093e-19	1.52909e-18
AL163953.1	0.0173986	0.39258	4.49594	3.80927e-12	9.2846e-12
AC102953.2	0.0770146	0.528265	2.77806	6.34095e-24	1.73319e-22
AC108463.2	0.0474443	0.250162	2.39856	8.38385e-17	3.35354e-16
AC064807.2	0.0273572	0.271423	3.31055	6.10459e-05	8.11119e-05
AC025575.2	0.0247302	0.44522	4.17017	8.74117e-06	1.23582e-05
AC079174.2	0.0483785	0.266695	2.46275	3.99451e-21	4.36733e-20
DANCR	4.42438	11.7866	1.4136	4.06388e-09	7.22188e-09
AC007448.4	0.264069	0.772098	1.54787	1.03457e-09	1.94385e-09
CR936218.1	0.0925161	0.23757	1.36058	0.000213999	0.000272665
POLH-AS1	0.101122	0.338027	1.74104	6.67449e-17	2.70753e-16
AC008393.1	0.315279	0.689947	1.12986	8.71709e-15	2.78752e-14
HMGA1P4	0.220081	0.467343	1.08645	0.0213892	0.0239559
AC079305.1	0.147634	0.58304	1.98157	1.23597e-07	1.94369e-07
AL355353.1	1.18304	2.46514	1.05917	0.000335526	0.000424211
SNHG32	9.75447	36.2081	1.89218	3.75045e-25	1.72221e-23
AC099778.1	0.069633	0.272557	1.96871	6.3351e-23	1.1544e-21
AC006213.4	0.253245	0.839264	1.72859	3.28669e-10	6.37352e-10
AC008608.2	0.970355	2.12974	1.13409	1.72644e-09	3.17621e-09
AP006623.1	0.0583429	0.288888	2.30788	2.11389e-20	1.74586e-19
RASAL2-AS1	0.0904879	0.251528	1.47492	1.17611e-14	3.7195e-14
ZMIZ1-AS1	0.0416379	0.241057	2.53341	1.17456e-17	5.26716e-17
HEIH	5.34175	12.8664	1.26823	2.06967e-24	6.78853e-23
SNHG6	11.7009	45.5376	1.96044	3.15901e-21	3.55543e-20
AC026356.1	0.0689112	0.240153	1.80114	2.38649e-09	4.34871e-09
TMPO-AS1	0.223928	1.15424	2.36584	1.33987e-23	3.27269e-22
AC004160.2	0.499148	0.168477	-1.56692	9.32035e-19	5.04706e-18
AC018904.1	0.950887	2.41173	1.34272	4.93677e-16	1.8282e-15
HLA-F-AS1	0.174924	0.490937	1.48881	1.86482e-14	5.80165e-14
AFAP1-AS1	0.00512921	1.32343	8.01133	1.65792e-13	4.63089e-13
AF117829.1	0.130914	0.412341	1.65522	4.77499e-18	2.31295e-17
PRKAR2A-AS1	0.0800301	0.377856	2.23922	5.59393e-22	7.83151e-21
ST7-AS1	0.206386	0.545946	1.40342	9.95047e-11	2.03259e-10
ELOVL2-AS1	0.159255	0.465794	1.54835	5.84507e-05	7.79342e-05
AL139286.1	0.039421	0.266183	2.75538	1.68382e-16	6.55262e-16
AC004943.2	0.120509	0.322988	1.42234	1.66909e-10	3.31508e-10
REPIN1-AS1	0.291505	0.867054	1.5726	8.30784e-13	2.17253e-12
AL590560.3	0.0724788	0.242303	1.74118	1.59581e-05	2.21255e-05
AC006449.6	0.636535	1.28247	1.01062	1.33247e-09	2.47922e-09
AC092535.5	1.03694	6.47147	2.64175	7.00035e-19	3.99821e-18
AL354733.3	0.26252	0.553279	1.07558	0.00107447	0.00130529
AL136162.1	0.0493014	0.364474	2.88611	1.24331e-23	3.10286e-22
MIR600HG	0.0952409	0.418571	2.13582	1.85443e-17	8.00335e-17
AC011472.1	0.217196	0.618419	1.50959	3.73565e-16	1.40607e-15
AC139795.2	0.317006	0.7169	1.17726	4.16874e-11	8.97883e-11
AC022150.2	0.203157	0.547938	1.43142	0.000316916	0.000401124
LINC01503	0.556853	1.43153	1.36219	0.00272099	0.00322696
AC092171.2	0.320882	3.08269	3.26407	1.15354e-27	4.41422e-25
CTBP1-DT	0.738001	1.7976	1.28438	1.00366e-21	1.28023e-20
AC120053.1	0.55038	1.62842	1.56497	6.08765e-20	4.59778e-19
Z83843.1	0.158435	0.390199	1.30032	1.36472e-10	2.73421e-10
ADAMTSL4-AS2	0.198071	0.401982	1.02111	1.03018e-05	1.45111e-05
PRR34-AS1	0.935418	3.42808	1.87372	2.01932e-13	5.55919e-13
LINC02163	0.00120967	1.02129	9.72156	1.63803e-14	5.10995e-14
PPP4R3B-DT	0.464077	0.946198	1.02778	1.55256e-10	3.09973e-10
AC012313.1	0.609874	1.30476	1.09721	9.69853e-17	3.82609e-16
AC009275.1	0.0873075	0.733148	3.06993	1.0161e-08	1.74929e-08
AC002398.1	0.309954	0.894128	1.52843	4.9583e-15	1.63098e-14
AL008635.1	0.11976	0.30786	1.36213	6.9546e-08	1.11507e-07
LINC00342	0.389269	1.13162	1.53955	2.17287e-14	6.66968e-14
AL139288.1	0.0284755	0.335321	3.55775	4.08163e-11	8.82432e-11
DNAJC9-AS1	0.072107	0.37298	2.37089	1.6431e-25	1.04793e-23
TGFB2-AS1	0.0651096	0.349643	2.42494	0.000192253	0.000245502
MINCR	0.769633	3.33948	2.11738	5.22811e-21	5.2648e-20
FOXP4-AS1	0.154445	0.431197	1.48125	0.0456326	0.0499869
AC139768.1	0.304324	0.639494	1.07132	6.55402e-12	1.54497e-11
AL132989.1	0.295301	0.66163	1.16384	1.60932e-07	2.50679e-07
AC103706.1	0.254451	1.34263	2.3996	7.37459e-21	7.11431e-20
AC100861.1	0.210324	0.546625	1.37794	1.48772e-11	3.39543e-11
ZNF687-AS1	0.677052	1.86819	1.4643	4.36629e-15	1.44452e-14
AC053503.4	0.150261	0.331885	1.14321	2.75288e-06	4.02075e-06
AC004477.2	0.19414	0.522787	1.42913	4.72601e-19	2.84055e-18
AL031186.1	0.123074	0.595767	2.27522	4.86911e-21	5.08158e-20
AC004908.2	0.157755	0.350596	1.15212	5.38176e-09	9.47587e-09
AC009237.14	1.33844	3.01723	1.17267	1.64439e-15	5.60166e-15
AL023803.2	0.0410146	0.545597	3.73363	4.13039e-24	1.20321e-22
AC022306.2	0.302516	1.22307	2.01543	1.26936e-22	2.05243e-21
AC127537.1	0.0865352	0.226044	1.38524	2.66895e-11	5.83611e-11
SNHG10	0.455102	1.51893	1.7388	1.55511e-23	3.68889e-22
AC027688.1	0.140566	0.547467	1.96152	1.88913e-07	2.92675e-07
PAN3-AS1	0.129659	0.281212	1.11693	1.99386e-09	3.65064e-09
AL354836.1	0.4877	1.49624	1.61728	2.75143e-15	9.29011e-15
STK24-AS1	0.042333	0.240711	2.50745	9.96144e-20	7.19228e-19
MAFG-DT	0.119233	1.47645	3.63028	7.98257e-25	3.27285e-23
AP003032.1	0.109004	0.288358	1.40348	0.00274332	0.00324673
SNHG25	0.651616	5.01862	2.9452	1.99245e-23	4.48498e-22
AL035071.1	0.803633	1.99884	1.31456	6.45168e-15	2.09817e-14
ZNF790-AS1	0.115038	0.389645	1.76005	2.91885e-05	3.97019e-05
Z98257.1	0.170202	0.806715	2.24481	1.07691e-08	1.84797e-08
CCR5AS	0.0917356	0.291766	1.66926	4.32545e-06	6.19927e-06
LINC00665	0.119604	1.40547	3.55471	1.61628e-10	3.22134e-10
AC233992.3	0.0824158	0.282148	1.77546	9.67201e-13	2.50078e-12
AL157392.3	0.123526	0.332408	1.42813	7.15662e-19	4.06723e-18
HYI-AS1	0.114346	0.483018	2.07868	1.2586e-17	5.60029e-17
AC007406.3	0.115266	0.239822	1.05699	6.4507e-07	9.73115e-07
MIR210HG	0.439851	1.41938	1.69018	0.000416062	0.00052144
AC016590.3	0.094312	0.260988	1.46847	6.15615e-10	1.17008e-09
AC000123.1	0.433409	0.95974	1.14691	1.65066e-12	4.18313e-12
LINC02506	0.137559	2.40083	4.12541	7.54269e-05	9.896e-05
HCP5	3.08027	8.09691	1.39431	1.1345e-09	2.12465e-09
AL049840.4	0.290179	0.661769	1.18939	6.50675e-11	1.37312e-10
AL512413.1	0.0376754	0.226572	2.58828	1.91234e-05	2.63866e-05
MID1IP1-AS1	0.322096	1.01015	1.649	2.55306e-09	4.63752e-09
AL662797.1	0.0859603	0.232919	1.43809	1.99811e-11	4.45404e-11
LUCAT1	0.0211228	0.578824	4.77625	1.11988e-08	1.91599e-08
AP001160.1	0.120795	0.416397	1.7854	1.9632e-18	1.02443e-17
AC116025.2	0.0183575	0.322263	4.1338	2.30019e-19	1.5176e-18
AC124798.1	0.181986	0.61745	1.7625	0.0255282	0.0284252
AP001453.2	0.135962	0.570928	2.07011	6.22964e-22	8.51385e-21
TTC23L-AS1	0.174442	0.511458	1.55187	1.45067e-16	5.68387e-16
SREBF2-AS1	0.190006	0.929223	2.28998	2.5758e-26	2.46418e-24
AL160006.1	0.215474	0.817242	1.92325	7.63164e-22	9.84396e-21
AC007541.1	0.39944	1.04333	1.38515	1.03942e-15	3.67154e-15
AC010201.2	0.0394909	0.279092	2.82115	6.8514e-22	9.25342e-21
AC092119.2	0.0414152	0.356879	3.1072	2.34337e-25	1.3451e-23
AC104564.3	0.0866859	0.240039	1.4694	4.25606e-06	6.10744e-06
LINC01836	0.229212	0.878819	1.93888	0.00428515	0.00499935
AP001372.2	0.554063	1.19958	1.11441	1.21965e-15	4.24292e-15
MIATNB	0.198102	0.40296	1.0244	4.91867e-11	1.05742e-10
AC073896.3	0.266161	0.603052	1.17998	3.58058e-09	6.38277e-09
LY6E-DT	0.434833	0.196566	-1.14545	5.63222e-15	1.84737e-14
AC010186.3	0.124882	0.329283	1.39876	1.42727e-09	2.64702e-09
AL139384.1	0.539317	1.44041	1.41727	1.21061e-14	3.81808e-14
AC015813.1	0.209155	0.796465	1.92904	6.07738e-17	2.47406e-16
AC012615.1	0.456284	1.73774	1.92921	1.09812e-23	2.80141e-22
ALDH1L1-AS2	0.319396	0.689547	1.1103	0.00311801	0.0036788
AL138828.1	0.00919143	0.327387	5.15457	4.97363e-11	1.06724e-10
AC022007.1	0.135075	0.54959	2.0246	5.67418e-23	1.08566e-21
AC104532.2	0.0867313	0.275721	1.66858	3.50359e-11	7.5889e-11
SP2-AS1	0.257037	0.560248	1.12409	1.29896e-11	2.9944e-11
AC114730.3	0.101313	0.298498	1.5589	1.77392e-10	3.49307e-10
SCAT2	0.0692734	0.495128	2.83743	2.53227e-20	2.04721e-19
AC237221.1	0.067426	0.385364	2.51485	0.0192467	0.0216195
LINC01093	30.8268	4.4664	-2.787	2.29479e-25	1.3451e-23
AL121583.1	0.0555989	0.232384	2.06338	2.81095e-15	9.4356e-15
AC006538.1	0.0293601	0.248556	3.08164	4.31822e-19	2.63539e-18
AC027271.1	0.0979717	0.271768	1.47194	6.64575e-10	1.25896e-09
CRYZL2P-SEC16B	0.19888	0.425481	1.09719	6.39211e-05	8.47362e-05
AC084824.5	0.330474	0.850634	1.364	1.71105e-15	5.8115e-15
AL928654.1	0.141582	0.506397	1.83863	4.39661e-17	1.82873e-16
LINC00653	0.0639445	0.284249	2.15226	6.52226e-18	3.05614e-17
LINC02802	0.034544	0.304076	3.13792	5.25596e-14	1.54318e-13
AP003469.2	0.0166073	0.495101	4.89783	5.52161e-13	1.46732e-12
AC011700.1	0.23329	0.548133	1.2324	3.55928e-06	5.12679e-06
AC008764.2	0.420982	1.18444	1.49237	8.15135e-11	1.68003e-10
AL359921.1	0.104373	0.314054	1.58927	8.08093e-11	1.66851e-10
KTN1-AS1	0.14376	0.397428	1.46703	2.46345e-19	1.60684e-18
MIR325HG	0.0247935	0.247509	3.31944	1.43453e-05	1.99618e-05
SLC12A9-AS1	0.108525	0.540475	2.3162	1.03849e-12	2.67907e-12
AC117386.2	0.00719435	0.433503	5.91303	2.07504e-11	4.60763e-11
AC008771.1	1.04518	2.52941	1.27505	5.02324e-19	3.00348e-18
AC007066.2	0.0855699	0.294385	1.78253	9.91069e-20	7.19228e-19
MIR155HG	0.174697	0.364423	1.06076	0.000382606	0.000481086
CHKB-DT	0.521489	1.28636	1.30259	2.62909e-16	1.00943e-15
AC139100.2	0.144009	0.980064	2.76672	6.93462e-22	9.25691e-21
AC007406.2	0.16021	1.18995	2.89286	1.97514e-06	2.89957e-06
AL050341.2	0.901121	2.17959	1.27427	7.24316e-16	2.61483e-15
COA6-AS1	1.03683	3.32292	1.68028	7.33983e-18	3.41139e-17
AC125437.1	0.144378	0.339607	1.23402	1.01636e-08	1.74929e-08
AL592148.3	0.136382	0.344866	1.33838	2.63359e-18	1.33188e-17
AL139287.1	0.856955	2.65659	1.63228	2.35393e-21	2.75746e-20
AC004253.1	0.100915	0.371688	1.88095	7.48419e-14	2.15335e-13
RAB30-DT	1.13012	2.47868	1.1331	2.142e-18	1.09778e-17
AL049840.3	0.244605	0.554654	1.18113	4.1617e-10	7.97602e-10
AC007773.1	0.13765	0.707799	2.36233	4.93181e-18	2.34929e-17
NFYC-AS1	0.121357	0.35493	1.54828	1.42601e-11	3.27412e-11
AC018690.1	0.212903	0.473775	1.15401	1.07902e-10	2.18898e-10
AC138696.2	0.58664	2.54174	2.11527	2.27796e-20	1.86792e-19
AL603839.3	0.272785	0.734063	1.42814	4.54182e-09	8.03391e-09
AL136295.2	0.133838	0.376947	1.49387	3.55351e-15	1.18244e-14
ZEB1-AS1	0.274888	0.805408	1.55088	3.63251e-22	5.27864e-21
AC004540.2	1.7493	0.567111	-1.62507	8.07708e-20	5.98225e-19
AC009120.2	0.185345	0.540115	1.54305	1.29266e-17	5.72965e-17
AC095057.3	0.171051	0.559146	1.70879	2.9496e-12	7.2664e-12
AP002807.1	0.172393	0.861442	2.32105	3.64544e-18	1.78845e-17
NRAV	0.820404	2.09072	1.34959	3.9787e-19	2.48237e-18
LRRC8D-DT	0.10788	0.477372	2.14569	5.30649e-17	2.16792e-16
AC087741.2	0.352441	1.30265	1.886	1.72478e-13	4.7943e-13
AL133410.1	0.0429788	0.254922	2.56836	2.78712e-17	1.18504e-16
AC127024.5	0.187299	0.878004	2.22889	9.46863e-21	8.69599e-20
LINC01275	0.136276	0.321622	1.23883	3.41187e-05	4.62436e-05
LINC00528	0.127875	0.637619	2.31796	2.49724e-20	2.03321e-19
CYTOR	0.722748	4.13073	2.51483	8.43033e-21	8.06501e-20
LENG8-AS1	0.190327	0.882615	2.2133	1.87043e-24	6.31546e-23
AC012467.2	0.571004	1.26955	1.15274	5.49539e-20	4.17795e-19
RNASEH1-AS1	1.30651	2.76946	1.08389	9.78823e-16	3.47891e-15
AC108047.1	0.239739	0.504403	1.07311	2.27713e-06	3.33438e-06
ALOX12-AS1	0.303181	0.700931	1.20909	1.42015e-20	1.2351e-19
LINC02615	0.110032	0.41003	1.8978	2.142e-18	1.09778e-17
AC105118.1	0.00175225	1.49914	9.74072	3.37784e-13	9.14566e-13
AC007298.2	1.13086	0.532698	-1.08603	1.08291e-12	2.7874e-12
AC005840.4	0.281507	0.568707	1.01451	1.3417e-08	2.28188e-08
U91328.3	0.0867605	0.2291	1.40087	1.25661e-14	3.95228e-14
GPRC5D-AS1	0.401211	0.934751	1.22022	1.66417e-19	1.14519e-18
SNHG7	1.41228	6.60958	2.22654	1.87043e-24	6.31546e-23
AL354892.2	1.05656	2.28471	1.11264	8.23983e-08	1.31016e-07
AC006042.1	0.156822	0.648316	2.04756	4.46808e-09	7.91567e-09
AC022211.2	0.0720385	0.32649	2.1802	8.63132e-19	4.76382e-18
ITGB1-DT	0.566653	1.56389	1.4646	0.00106001	0.00128907
AC023090.1	0.0077464	0.626512	6.33767	7.54048e-09	1.31958e-08
AC115618.2	2.29142	4.70242	1.03716	5.94492e-11	1.27091e-10
RUSC1-AS1	0.286733	1.65477	2.52886	1.14036e-24	4.223e-23
AL645933.2	0.712656	1.56922	1.13877	1.98049e-08	3.32884e-08
ZNF232-AS1	0.325398	1.50426	2.20877	3.99365e-20	3.09777e-19
AC099850.1	0.0935973	0.307722	1.71709	3.89763e-17	1.62708e-16
AC073575.2	0.0766364	0.250974	1.71143	3.50737e-14	1.04856e-13
LINC01138	0.226353	1.05528	2.22099	5.95905e-23	1.12147e-21
AP000894.4	0.374369	1.25962	1.75046	3.26478e-13	8.86043e-13
AC002116.2	0.101584	0.455346	2.16429	5.13493e-19	3.05435e-18
NDUFV2-AS1	0.314925	0.759895	1.27079	3.25638e-19	2.08845e-18
AL355488.1	0.159005	0.990814	2.63954	9.06822e-25	3.58976e-23
AC132938.1	0.100497	0.460054	2.19465	2.87198e-06	4.17876e-06
AL596223.2	0.0168997	0.235135	3.79842	1.32637e-09	2.47188e-09
AL606489.1	0.0559385	0.834341	3.89873	8.23275e-24	2.19795e-22
AC073573.1	0.0957012	0.253485	1.40529	0.00429123	0.00500135
AC012313.9	0.864041	1.75757	1.02441	9.24109e-07	1.38496e-06
FAM83C-AS1	0.0591444	0.286132	2.27437	5.87232e-13	1.55332e-12
AC009779.2	1.79333	3.78387	1.07722	1.42111e-16	5.58709e-16
AC092803.1	0.279884	0.929443	1.73154	2.35393e-21	2.75746e-20
AL117379.1	0.126153	0.619514	2.29596	1.10379e-21	1.37734e-20
LINC01857	0.259608	0.534095	1.04076	0.000205374	0.000261965
AC010969.2	0.527831	1.19394	1.17758	1.85443e-17	8.00335e-17
AL162595.1	0.249471	0.77042	1.62677	1.36327e-17	5.99628e-17
MIR181A2HG	0.0618133	0.257242	2.05714	3.11279e-06	4.51197e-06
AP001462.1	0.119994	0.303841	1.34035	6.10448e-11	1.30259e-10
AL118516.1	1.73965	3.55827	1.03238	2.12263e-10	4.15832e-10
MYLK-AS1	0.0974086	0.699674	2.84456	7.52926e-27	1.2672e-24
AC025048.4	0.0714417	0.266975	1.90187	2.23242e-14	6.83419e-14
AP003119.1	0.195245	0.959531	2.29704	3.03923e-09	5.4773e-09
LINC01124	0.949325	3.41441	1.84666	2.76512e-05	3.76555e-05
AL031963.3	0.190441	0.544199	1.51479	9.09623e-13	2.36791e-12
AC023043.3	0.252395	0.890745	1.81933	6.64511e-13	1.7537e-12
ASB16-AS1	0.835192	2.62452	1.65188	2.86266e-25	1.49379e-23
AL357079.1	0.0861035	0.368536	2.09766	1.66597e-18	8.81353e-18
ZNF460-AS1	0.173542	0.406157	1.22675	2.99385e-13	8.16376e-13
AC005046.1	0.154108	0.441008	1.51686	1.70946e-10	3.3784e-10
AL360181.1	1.3104	2.76498	1.07727	0.0270174	0.0300251
AC008443.4	0.643931	1.837	1.51237	4.13146e-10	7.93131e-10
AC073534.2	0.11566	0.26507	1.19648	2.48499e-05	3.39615e-05
AC006213.3	0.0609294	0.391227	2.68279	4.54596e-06	6.50719e-06
Z84485.1	0.0800929	0.337053	2.07323	3.38329e-15	1.12907e-14
AC008750.4	0.115262	0.263685	1.1939	6.72966e-07	1.01254e-06
AC142472.1	0.218401	0.663329	1.60275	5.36856e-19	3.16057e-18
LINC01186	0.0764831	0.778008	3.34657	1.60701e-14	5.02682e-14
LNCTAM34A	0.319557	0.918125	1.52262	9.60284e-15	3.05376e-14
SNHG1	1.24386	6.04175	2.28014	4.46995e-26	3.66536e-24
AC139530.1	0.504627	1.53211	1.60223	9.25135e-21	8.56496e-20
AL132639.2	0.113299	0.298689	1.39851	1.93291e-11	4.32549e-11
SNHG30	1.35494	3.94449	1.54161	8.4438e-19	4.68284e-18
AC064836.2	0.488655	1.08665	1.153	7.08439e-10	1.33545e-09
AC016405.3	0.210645	0.929251	2.14125	3.02801e-12	7.44358e-12
AC138028.4	0.126533	0.388902	1.61989	2.38433e-11	5.24482e-11
ZNF337-AS1	0.141087	0.468125	1.7303	5.86813e-22	8.1164e-21
AL354760.1	0.0583502	0.22102	1.92137	2.26942e-13	6.23277e-13
AC007996.1	0.225625	0.713521	1.66103	1.58029e-15	5.43165e-15
LINC02846	0.0619185	0.228105	1.88126	6.40178e-10	1.21475e-09
SNHG14	0.211369	0.637834	1.59342	0.00612895	0.00704308
LINC01484	0.203283	0.553471	1.44502	1.46031e-09	2.69958e-09
AC078909.2	0.0227442	0.344964	3.92288	3.74363e-17	1.5685e-16
SNHG12	0.473602	1.81127	1.93525	7.10437e-22	9.37451e-21
LINC01770	0.756309	1.98962	1.39544	2.32427e-07	3.57197e-07
LINC00622	0.0516851	0.257883	2.3189	3.22005e-15	1.07773e-14
FMR1-IT1	0.0915843	0.323831	1.82207	4.95652e-09	8.75398e-09
AC005332.3	1.73785	4.63555	1.41544	2.31156e-18	1.17419e-17
AC106820.3	0.182074	0.936768	2.36317	6.44043e-19	3.71539e-18
AP001505.1	1.27871	3.85531	1.59216	1.7716e-12	4.46008e-12
AP001271.1	0.0915286	0.312893	1.77338	0.0037292	0.00437295
AL161668.4	6.37786	2.54853	-1.32341	4.74068e-16	1.76126e-15
AC020907.4	0.0601464	0.332769	2.46797	2.4674e-13	6.76034e-13
PDXDC2P-NPIPB14P	0.334902	0.709271	1.0826	1.27932e-10	2.5766e-10
LINC01748	0.00260712	0.233148	6.48264	5.86188e-09	1.02897e-08
AC026462.3	1.32037	3.73676	1.50084	5.91239e-05	7.87405e-05
AC007566.1	0.222305	0.549459	1.30547	4.23313e-09	7.51103e-09
TMEM161B-AS1	0.402836	1.10788	1.45953	1.25411e-18	6.69635e-18
AC145423.1	0.094337	0.503512	2.41613	1.2347e-12	3.16392e-12
AC100793.4	0.0890747	0.296244	1.7337	1.60544e-05	2.22321e-05
AC132872.3	0.248568	0.632864	1.34826	1.93283e-09	3.55022e-09
DLEU2	0.182354	0.487094	1.41746	6.22761e-16	2.27685e-15
CAMTA1-DT	0.242566	0.593918	1.29189	1.16341e-07	1.83209e-07
AC008105.2	0.113023	0.29238	1.37123	3.10351e-06	4.50421e-06
LINC02041	0.0809132	1.09288	3.75561	0.00272886	0.00323296
AC021078.1	0.380296	0.829084	1.1244	9.11127e-14	2.58904e-13
AC009065.8	0.518518	1.21977	1.23414	5.9682e-15	1.95199e-14
AC007405.3	0.903436	2.43442	1.43008	8.71709e-15	2.78752e-14
AC084125.2	0.122371	0.365842	1.57996	1.79173e-11	4.03316e-11
AC112491.1	0.980106	1.97338	1.00966	0.00164311	0.00197724
AC020656.2	0.0813319	0.35617	2.13067	5.78928e-05	7.72802e-05
MKLN1-AS	0.16669	0.496122	1.57353	7.04176e-15	2.2836e-14
AC024060.2	0.86913	2.73328	1.65299	8.18842e-23	1.40303e-21
AC116914.2	0.134518	0.478187	1.82977	2.27441e-14	6.9442e-14
TDRKH-AS1	0.0579021	0.319013	2.46193	1.62766e-22	2.49141e-21
ARHGAP27P1-BPTFP1-KPNA2P3	0.177379	0.584585	1.72058	8.62856e-21	8.11934e-20
AL645608.7	0.129911	0.442507	1.76818	8.06191e-05	0.000105291
LINC01063	0.0966336	0.297361	1.62162	7.292e-06	1.03476e-05
AC010547.2	2.31583	1.13197	-1.03269	5.12076e-24	1.43381e-22
ARF4-AS1	0.157135	0.450967	1.52102	8.25007e-11	1.69429e-10
PRDX6-AS1	0.208177	0.485501	1.22166	4.58988e-13	1.22825e-12
AP002992.1	0.13156	0.301548	1.19667	0.000761765	0.000934553
AL121832.2	0.779115	2.72705	1.80744	1.48724e-19	1.04107e-18
AL513534.2	0.12743	0.469279	1.88074	6.82706e-13	1.79758e-12
AC009407.1	3.99109	10.4465	1.38817	3.63493e-09	6.46962e-09
AC145343.1	0.145612	0.786465	2.43326	5.73359e-18	2.70871e-17
AC245884.8	0.0902014	0.401267	2.15334	3.44229e-19	2.19541e-18
FAM111A-DT	0.273121	0.698282	1.35427	7.48335e-17	3.01434e-16
PRRT3-AS1	0.442701	1.74838	1.98161	2.87261e-10	5.57996e-10
ILRUN-AS1	2.1053	4.60508	1.1292	6.72547e-12	1.58214e-11
AC129510.1	0.0901453	0.278624	1.628	2.099e-09	3.83092e-09
ELF3-AS1	0.433825	2.17738	2.32741	1.03689e-19	7.43966e-19
AC063948.1	0.0743224	0.387162	2.38107	8.4132e-19	4.68284e-18
AL513218.1	0.068022	0.268198	1.97923	4.59986e-14	1.35749e-13
LINC01963	0.286277	0.85375	1.5764	9.60284e-15	3.05376e-14
AL136531.1	0.175496	0.477563	1.44425	1.15318e-11	2.67444e-11
NIFK-AS1	0.570199	1.26489	1.14947	3.89121e-19	2.44104e-18
MAPKAPK5-AS1	1.35074	3.96757	1.5545	8.83064e-27	1.2672e-24
AC024075.1	0.174663	0.549903	1.65461	5.20387e-10	9.92367e-10
AC010531.5	0.136242	0.374684	1.45951	0.00251492	0.00299494
AL139349.1	0.10616	0.398728	1.90916	2.53655e-12	6.28934e-12
AC092384.2	0.604478	0.181157	-1.73845	1.35775e-19	9.56252e-19
AC011468.5	0.159067	0.363779	1.19342	3.71702e-07	5.67439e-07
AC024075.2	0.80442	2.40897	1.58239	4.93132e-21	5.08455e-20
GARS1-DT	0.15058	0.515299	1.77488	1.04319e-24	3.99194e-23
AP000240.1	0.213293	0.639438	1.58397	1.16922e-09	2.1861e-09
AP001437.1	0.0608111	0.23421	1.9454	1.89076e-13	5.23776e-13
LINC00205	0.289346	1.40556	2.28028	1.02782e-21	1.29663e-20
ELFN1-AS1	0.0456598	0.910602	4.31782	0.00586881	0.00676445
AC015849.3	0.184326	0.56545	1.61714	7.65049e-10	1.4398e-09
AC010973.2	0.110305	0.626642	2.50615	7.06185e-26	5.40467e-24
ATP6V0E2-AS1	0.077775	0.306715	1.97952	2.25831e-15	7.6476e-15
AC009237.15	0.246232	0.665483	1.43438	5.70816e-12	1.34835e-11
AL391244.1	0.0381039	0.249632	2.71179	1.20127e-11	2.78037e-11
AC008915.2	0.92107	1.967	1.09462	1.56465e-15	5.39405e-15
AC109460.2	0.0758549	0.282471	1.89679	1.75967e-10	3.47096e-10
AC022144.1	0.523767	1.21803	1.21756	0.000648466	0.000801334
TAT-AS1	0.427066	0.881869	1.04611	0.00945375	0.0107989
ERICD	0.11064	0.328828	1.57145	1.42257e-13	3.99295e-13
LINC02561	0.0217171	0.389982	4.1665	8.09864e-18	3.73383e-17
AC104794.3	1.43196	3.12183	1.1244	4.55366e-14	1.34732e-13
LINC01116	0.0304118	0.515883	4.08434	8.86556e-19	4.8697e-18
AL117335.1	0.0527678	0.266389	2.33581	7.82295e-09	1.36693e-08
AC034236.2	0.189172	0.602546	1.67137	2.21919e-21	2.65378e-20
DGUOK-AS1	0.113086	0.41285	1.8682	6.22761e-16	2.27685e-15
MCCC1-AS1	0.0649522	0.301272	2.21362	6.43723e-15	2.09817e-14
RHPN1-AS1	0.102895	0.46784	2.18484	3.00183e-16	1.14488e-15
LINC01474	0.368581	2.54907	2.78992	0.0045414	0.00527685
CRIM1-DT	0.851886	3.14807	1.88574	0.000111587	0.000144421
AC026401.3	0.913817	3.27051	1.83954	2.23733e-18	1.14153e-17
AL671710.1	0.0752344	0.260757	1.79324	3.55255e-21	3.92147e-20
AC084824.4	0.42867	1.02441	1.25686	1.66436e-13	4.6376e-13
LINC00294	0.862224	1.87437	1.12027	2.8415e-18	1.41828e-17
AC026369.2	0.198162	0.548709	1.46936	1.89344e-13	5.23776e-13
NOP14-AS1	0.508031	1.08681	1.09712	4.54367e-21	4.92088e-20
AC005696.1	0.36597	0.830937	1.18301	1.46762e-08	2.485e-08
AC243964.3	0.765912	1.81137	1.24183	1.96263e-06	2.88488e-06
AC091488.1	0.0921419	0.225539	1.29145	0.00351415	0.00414194
PARD3-AS1	0.21016	0.590742	1.49104	1.96575e-08	3.30891e-08
AL355574.1	0.219373	0.91761	2.0645	6.62385e-19	3.80209e-18
AC025178.1	0.129506	0.343692	1.4081	6.16858e-11	1.31383e-10
AC103691.1	0.443405	0.929335	1.06757	8.70036e-08	1.38147e-07
AC010761.1	0.219843	0.749769	1.76997	8.80493e-18	4.04322e-17
DLGAP1-AS1	1.27183	3.068	1.2704	2.08897e-10	4.09938e-10
CAHM	0.134912	0.462257	1.77668	9.98598e-16	3.53824e-15
TRAPPC12-AS1	0.145231	0.386984	1.41392	5.81207e-07	8.80245e-07
AL031123.2	0.0756959	0.31264	2.04622	8.56451e-17	3.4021e-16
AC005785.1	0.063255	0.290224	2.19791	5.46163e-22	7.74068e-21
NCK1-DT	0.636228	1.41633	1.15455	2.25257e-19	1.49477e-18
AC005104.1	0.128813	0.396971	1.62376	5.08692e-09	8.97049e-09
LMNTD2-AS1	0.195997	0.824573	2.07282	7.6309e-14	2.18461e-13
AL035461.2	0.370123	2.05954	2.47625	6.51711e-20	4.88996e-19
AC099518.6	0.109961	0.230653	1.06873	0.00139606	0.00168702
LINC01311	0.0645253	0.458009	2.82744	1.33177e-26	1.48491e-24
LINC00839	0.0546926	0.339929	2.63582	1.313e-07	2.05919e-07
AC022098.3	0.0841139	0.31323	1.89681	7.98747e-11	1.65218e-10
LINC01549	0.128305	2.12859	4.05225	0.000559799	0.000694005
AP002748.4	0.545956	1.29413	1.24513	2.48312e-14	7.56133e-14
AC074212.1	0.153294	0.633311	2.04661	7.7982e-23	1.35641e-21
AC099508.2	1.93298	0.547204	-1.82067	4.33875e-19	2.63539e-18
ASH1L-AS1	0.294663	0.774384	1.39398	5.26106e-18	2.49574e-17
AC232271.1	0.0823206	0.337276	2.0346	4.70598e-21	5.00228e-20
AC107068.1	0.154634	0.423103	1.45215	1.93464e-17	8.28719e-17
PSPC1-AS2	0.1404	0.410891	1.54921	7.62308e-13	1.99801e-12
GAS6-DT	0.105478	0.262533	1.31555	1.30584e-05	1.82385e-05
ZNF32-AS2	0.0770347	0.290847	1.91668	4.54369e-12	1.0867e-11
AC006273.1	0.0429851	0.239555	2.47845	0.000167152	0.000213925
LNCSRLR	0.123079	0.277579	1.17332	3.85371e-05	5.19866e-05
AC068473.5	0.419292	1.15734	1.46478	1.79919e-18	9.43138e-18
LINC00893	0.0644909	0.275799	2.09645	3.46211e-19	2.19586e-18
AL118558.3	0.591829	1.33673	1.17546	1.63612e-12	4.15546e-12
LINC01011	0.131243	0.43772	1.73777	1.81565e-21	2.19407e-20
BACE1-AS	0.560946	2.14949	1.93806	5.03779e-25	2.22438e-23
LINC00926	0.106688	0.29505	1.46756	4.13434e-11	8.92147e-11
AC110995.1	0.43644	0.214717	-1.02335	1.29474e-11	2.99066e-11
AC009686.2	0.171282	0.670775	1.96945	7.11975e-11	1.48879e-10
AL137186.2	0.124567	0.432041	1.79425	9.48893e-18	4.2887e-17
AC027644.3	1.3134	2.82377	1.10432	8.81933e-08	1.39842e-07
AL136295.6	0.188168	0.605087	1.68512	1.02698e-20	9.28323e-20
AC109322.1	0.245663	1.54549	2.65331	1.87391e-27	5.37813e-25
ARIH2OS	0.2474	0.78973	1.67451	1.82367e-24	6.31546e-23
AL512353.1	0.195339	0.483571	1.30775	7.34976e-05	9.65391e-05
LINC00847	2.09864	4.26408	1.02278	3.39189e-16	1.28511e-15
AL353708.3	0.0442496	0.414772	3.22858	8.46892e-26	6.07645e-24
MIR9-3HG	0.0252416	0.293508	3.53952	0.00793496	0.00910024
LINC01818	0.641917	0.159909	-2.00513	1.09868e-20	9.79764e-20
AL732292.2	0.059726	0.251258	2.07274	4.05448e-12	9.84048e-12
AC245140.2	0.177856	0.448574	1.33464	1.39929e-18	7.43696e-18
CH17-340M24.3	3.36268	9.02812	1.42482	1.97602e-17	8.43297e-17
LINC01004	0.201823	0.842962	2.06238	2.08635e-22	3.15149e-21
Z98884.2	0.171155	0.468987	1.45424	1.43758e-11	3.29409e-11
BTF3-DT	0.204412	0.52726	1.36704	1.72497e-11	3.89815e-11
AL121894.2	0.154538	0.418116	1.43594	1.11929e-10	2.26223e-10
RFX5-AS1	0.181696	0.369471	1.02393	1.17672e-05	1.65346e-05
LINC00623	0.739846	1.69271	1.19404	2.17452e-11	4.80992e-11
AC011481.1	0.0738722	0.350238	2.24523	4.8138e-17	1.98054e-16
AC104958.2	3.57454	12.1027	1.7595	3.23999e-14	9.73694e-14
MACORIS	0.0829899	0.242905	1.54939	1.61368e-08	2.72828e-08
AC007114.1	1.29532	2.73066	1.07594	6.19435e-11	1.31444e-10
PAX8-AS1	0.141349	0.471203	1.73709	0.0357837	0.0395758
RPL37A-DT	0.0790854	0.356134	2.17094	4.54598e-19	2.74673e-18
AC010326.3	1.23889	2.95921	1.25617	4.8306e-17	1.98054e-16
AC090517.2	0.152264	0.406699	1.41738	5.01508e-12	1.18953e-11
IER3-AS1	0.287064	0.596607	1.05541	3.52899e-10	6.80887e-10
AC090772.3	0.0983999	0.509421	2.37213	2.46725e-10	4.80069e-10
AC004812.2	0.156451	0.507039	1.69639	7.07215e-23	1.26857e-21
AC090114.2	0.215526	0.562639	1.38435	3.01191e-19	1.95349e-18
LINC00239	0.10789	0.636681	2.561	1.43349e-05	1.99618e-05
AL358472.2	0.389859	0.892932	1.1956	4.37194e-16	1.63485e-15
AL121772.3	0.0451012	0.234479	2.37822	2.14433e-16	8.2885e-16
TMEM44-AS1	2.56596	5.85702	1.19067	1.52427e-12	3.89724e-12
UBR5-AS1	0.675682	1.83851	1.44412	1.57452e-23	3.68889e-22
AC018809.1	0.0362652	0.367808	3.34229	4.85786e-23	9.45224e-22
AC087741.1	0.18484	0.716305	1.9543	6.13106e-19	3.55478e-18
PTOV1-AS2	0.453243	1.55688	1.7803	2.66235e-18	1.33466e-17
LINC00115	0.175109	0.397826	1.18388	2.45386e-12	6.11069e-12
PPP1R14B-AS1	0.292719	1.2141	2.0523	1.38522e-14	4.3449e-14
SNHG4	0.0495361	0.455713	3.20157	8.03446e-19	4.54363e-18
ZNNT1	0.370407	1.61505	2.12439	1.3877e-20	1.21609e-19
SNHG8	19.4786	40.2225	1.04612	2.52892e-11	5.54046e-11
AC090229.1	0.130964	0.283318	1.11325	7.50965e-07	1.12841e-06
AL355297.3	0.157801	0.379796	1.26712	9.47522e-07	1.41819e-06
AC015871.3	0.359205	0.808541	1.17051	5.85817e-13	1.55316e-12
ZFPM2-AS1	0.0538648	1.49345	4.79317	1.20233e-08	2.05092e-08
AL080317.2	0.0722787	0.284434	1.97645	2.02847e-18	1.04896e-17
MED8-AS1	0.0853635	0.334227	1.96914	2.78011e-15	9.35943e-15
AP003486.1	0.341558	0.827403	1.27646	1.61202e-15	5.52419e-15
LINC01089	0.248189	1.23395	2.31377	3.81964e-26	3.37304e-24
ANKRD10-IT1	0.853368	2.26904	1.41084	1.6643e-07	2.58541e-07
AC048341.2	0.215025	1.08792	2.339	3.03161e-21	3.48029e-20
ATXN2-AS	0.17816	0.546941	1.61821	1.0671e-17	4.80405e-17
AP002954.1	0.398372	0.182595	-1.12547	6.55793e-08	1.05589e-07
AC093673.1	3.16343	7.33399	1.21311	2.10263e-11	4.65988e-11
AC027307.2	2.8922	8.62163	1.57579	4.19236e-24	1.20321e-22
AL161729.3	0.110428	0.223498	1.01716	0.000108691	0.000140832
AL109615.3	0.045131	0.733589	4.02278	1.81504e-11	4.07763e-11
ZNF213-AS1	0.499615	1.26714	1.34269	9.14455e-21	8.53491e-20
MAFA-AS1	0.00171366	1.76214	10.006	1.9071e-13	5.26286e-13
AC139887.2	0.213462	0.679314	1.6701	3.8591e-20	3.01378e-19
AC015912.3	0.368842	1.48286	2.0073	7.29825e-11	1.52058e-10
STARD7-AS1	0.404999	0.896532	1.14644	2.68039e-23	5.6983e-22
ZNRD2-AS1	0.224845	0.500213	1.15361	3.28817e-20	2.6214e-19
AC006435.2	0.0758059	0.265306	1.80728	1.62598e-11	3.6817e-11
AP006621.4	0.130886	0.311844	1.25252	0.000901295	0.00109956
MIR4435-2HG	0.372212	2.01448	2.43621	9.95221e-23	1.65582e-21
AL353801.3	0.0448274	0.237765	2.40709	1.3553e-15	4.6864e-15
AC020915.2	0.384038	1.19314	1.63544	1.46845e-22	2.27808e-21
AP002360.1	1.21458	4.0671	1.74354	8.07974e-19	4.54684e-18
AC073842.2	0.0355886	0.299099	3.07113	3.30244e-17	1.38872e-16
AL590705.3	0.157287	0.451761	1.52216	6.18838e-11	1.31444e-10
PRKAR1B-AS1	0.312737	0.842778	1.4302	1.88433e-08	3.17652e-08
AC009065.2	0.0867674	0.263152	1.60067	0.000724713	0.000890761
AP003352.1	0.373765	1.54108	2.04374	2.64751e-23	5.6983e-22
AP000759.1	0.605085	1.53736	1.34525	3.17912e-14	9.57909e-14
LINC02100	0.0685557	0.231366	1.75483	6.72756e-06	9.57031e-06
AC131009.3	0.4517	1.22189	1.43568	1.74827e-12	4.41103e-12
LINC00641	0.185227	0.425148	1.19867	1.05383e-08	1.81107e-08
ITGB2-AS1	0.227404	0.475788	1.06506	0.000120318	0.000155022
AC074117.1	0.472669	1.29455	1.45355	4.76134e-21	5.0147e-20
AP003392.1	0.15605	0.417925	1.42124	6.13995e-07	9.28677e-07
AC006449.2	0.0668791	0.226648	1.76083	7.7166e-12	1.80789e-11
AC009133.1	0.332979	0.782375	1.23243	1.69131e-21	2.06556e-20
SNHG19	10.3083	26.1105	1.34082	1.5654e-06	2.32481e-06
ZFAND2A-DT	1.12044	2.85103	1.34742	9.18959e-18	4.20305e-17
AC125257.1	1.26042	2.68878	1.09305	1.38296e-21	1.70714e-20
OTUD6B-AS1	1.62141	3.28037	1.01661	3.27151e-18	1.61188e-17
LINC00862	0.0579747	0.303941	2.3903	4.97072e-12	1.1839e-11
SCTR-AS1	0.0988361	0.983149	3.3143	1.05069e-07	1.66142e-07
AC025682.1	0.129665	0.307053	1.2437	3.39721e-14	1.01828e-13
LINC01269	0.0126834	0.291417	4.52207	2.47012e-09	4.49398e-09
AC004687.1	0.196521	0.638455	1.6999	1.52724e-06	2.27402e-06
AC034229.4	0.0241144	0.280543	3.54025	2.24744e-19	1.49477e-18
AC016888.1	2.4167	6.05821	1.32585	2.70238e-12	6.67168e-12
WARS2-AS1	0.1719	0.426345	1.31045	9.51206e-13	2.47055e-12
AC008738.2	0.104641	0.452417	2.11221	9.26683e-11	1.8997e-10
ALG13-AS1	0.102985	0.221068	1.10205	0.00362633	0.00426539
AC004263.1	0.035277	0.247782	2.81227	4.86799e-18	2.34356e-17
PVT1	0.118649	0.929567	2.96986	2.89889e-20	2.32722e-19
MAILR	0.249968	0.644122	1.36559	4.10813e-12	9.92871e-12
AL355802.3	0.122382	0.583838	2.25418	5.07072e-20	3.90684e-19
AC011445.1	0.303189	2.8056	3.21002	8.52039e-21	8.0838e-20
LINC01719	0.112165	0.538524	2.26338	9.26341e-16	3.30261e-15
SNHG3	0.633349	3.31461	2.38777	3.51515e-23	7.20606e-22
HMGN3-AS1	0.139479	0.343658	1.30093	6.77956e-11	1.42284e-10
AC084125.4	0.179535	0.671596	1.90333	1.07801e-14	3.41867e-14
AL360181.2	0.334574	0.846639	1.33942	5.2253e-10	9.94799e-10
VPS13B-DT	0.732605	2.32134	1.66385	4.03716e-15	1.3395e-14
LINC00511	0.0333773	0.523643	3.97164	6.9602e-12	1.63401e-11
LINC02027	5.57754	1.86727	-1.5787	1.66592e-19	1.14519e-18
AC023509.3	1.11865	2.48316	1.15042	1.64248e-10	3.26788e-10
AC010245.2	0.168388	0.362419	1.10587	3.4325e-13	9.27178e-13
LINC02062	0.20721	0.548325	1.40393	1.57835e-11	3.58802e-11
AC012676.1	0.072657	0.30457	2.0676	3.01339e-17	1.27652e-16
AL355482.1	0.0631047	0.359044	2.50834	0.000169125	0.000216209
AL512598.1	0.115341	0.653988	2.50336	8.57088e-09	1.48631e-08
MIR583HG	0.0814838	0.227356	1.48037	8.12436e-09	1.41315e-08
HNRNPD-DT	0.0692996	0.293114	2.08055	2.10137e-20	1.74586e-19
AC021851.1	0.111336	0.30654	1.46116	1.59327e-12	4.0646e-12
AC104534.1	0.124183	0.870038	2.80861	5.87573e-11	1.25846e-10
AC025171.2	0.102256	0.471545	2.20521	2.06581e-20	1.73106e-19
AC022784.1	0.246774	1.01301	2.03739	5.16127e-07	7.84787e-07
AL031714.1	0.101252	0.231599	1.19368	7.64497e-08	1.21895e-07
AC009065.4	0.169893	0.610909	1.84633	5.94459e-21	5.93426e-20
AL391427.1	0.333896	1.4187	2.0871	1.3899e-11	3.19761e-11
BX537318.1	0.477849	1.42376	1.57508	6.91736e-21	6.78729e-20
U91328.1	0.472912	1.22856	1.37733	2.13179e-14	6.5611e-14
AC012313.5	0.104289	0.214881	1.04294	0.000516735	0.000644796
AL031600.1	0.0697979	0.367438	2.39625	8.65628e-14	2.46586e-13
BX322562.1	0.793129	2.01964	1.34847	0.0165416	0.0186174
AC145207.5	0.195689	0.684148	1.80575	4.30052e-19	2.63539e-18
AC005920.4	0.45807	1.22889	1.42371	0.00037545	0.000472606
AC010359.2	0.170003	0.431349	1.34329	5.4745e-13	1.45817e-12
AC093249.6	0.218891	0.632028	1.52977	4.93187e-18	2.34929e-17
LINC01224	0.0051939	0.244184	5.55501	1.88554e-14	5.85027e-14
AL118558.4	0.176586	0.415406	1.23415	1.46752e-08	2.485e-08
LINC01980	0.0056925	1.76477	8.2762	2.59257e-08	4.32598e-08
CERNA1	0.0663579	0.31637	2.25327	9.89715e-07	1.47942e-06
AL391056.1	0.0226113	0.671633	4.89256	1.40372e-07	2.19845e-07
AC004585.1	0.11789	0.324841	1.46229	1.4025e-05	1.95635e-05
AC012368.1	0.178295	0.46861	1.39412	6.56005e-05	8.66621e-05
CTC-338M12.4	0.115591	0.374174	1.69468	1.76027e-19	1.19573e-18
FOXD2-AS1	0.225472	1.57958	2.80853	5.04799e-21	5.1284e-20
AC011477.1	0.378295	0.986702	1.3831	2.24904e-07	3.46564e-07
PRKCZ-AS1	0.138261	0.387731	1.48766	4.48077e-12	1.07389e-11
SNHG15	0.907477	1.88403	1.05389	8.83446e-06	1.24747e-05
TRIM52-AS1	2.19844	4.95346	1.17196	1.09272e-15	3.82453e-15
AC106782.5	0.191692	0.542518	1.50088	5.70729e-14	1.66717e-13
AC078993.1	0.0260488	0.834589	5.00178	3.55321e-10	6.84064e-10
AC091057.1	0.0311859	0.230632	2.88663	8.91837e-23	1.50563e-21
AL355102.4	0.350582	2.51366	2.84196	2.42113e-05	3.32074e-05
RAD51-AS1	0.343281	1.05652	1.62186	7.46784e-20	5.56694e-19
NRSN2-AS1	0.361432	0.952883	1.39857	4.2534e-12	1.02367e-11
AC084036.1	1.12805	3.56544	1.66025	4.50687e-16	1.67983e-15
AC005332.5	0.359772	1.79095	2.31557	1.0633e-26	1.35629e-24
AP003419.3	0.0610147	0.42556	2.80213	1.48171e-16	5.78574e-16
AC008115.3	0.119904	0.351119	1.55008	4.24671e-12	1.02367e-11
AL441992.1	1.04832	3.2731	1.64259	1.85177e-20	1.57469e-19
EIF3J-DT	0.46915	1.01565	1.11428	7.31638e-16	2.63298e-15
AC104463.2	0.115072	0.348538	1.59878	1.05007e-10	2.14116e-10
MYG1-AS1	0.204749	0.733007	1.83997	1.14876e-18	6.19143e-18
RPARP-AS1	0.721191	1.48984	1.04671	4.38508e-14	1.30079e-13
KLF3-AS1	0.0972035	0.239309	1.29979	6.6653e-06	9.49351e-06
LINC01355	0.107445	0.424661	1.98271	3.23626e-18	1.60139e-17
FBXL19-AS1	0.0727666	0.359616	2.30511	4.87902e-18	2.34356e-17
AC084018.1	0.231808	1.10295	2.25037	9.36202e-17	3.70607e-16
LINC01139	0.0354555	0.881146	4.6353	0.044866	0.049194
CAPN10-DT	0.0397736	0.328857	3.04758	2.78466e-27	6.39358e-25
AC003070.1	0.141398	0.401022	1.50392	1.83544e-06	2.70833e-06
SBF2-AS1	0.233662	0.755556	1.69312	3.37967e-22	4.97418e-21
MUC12-AS1	0.0614431	0.620857	3.33694	0.000339021	0.000428159
SNHG9	3.26092	9.52841	1.54696	1.33206e-10	2.67812e-10
LINC00997	0.581848	1.17816	1.01782	8.00912e-16	2.87327e-15
AL451069.3	0.00584228	0.226633	5.27768	7.31488e-05	9.61911e-05
ZNF503-AS2	0.411787	1.04038	1.33715	1.66799e-17	7.25323e-17
AP000424.2	0.121326	0.591554	2.28562	0.00187535	0.00224729
LINC02313	0.0166137	0.355491	4.41937	8.14144e-12	1.90354e-11
AL121944.1	1.26188	2.52791	1.00237	6.34886e-11	1.34226e-10
AC018638.7	0.10973	0.39368	1.84306	2.40056e-12	5.99095e-12
AC005253.1	0.0785479	0.278355	1.82528	9.28829e-18	4.23133e-17
AL591895.1	2.80341	10.1594	1.85756	3.08564e-21	3.50724e-20
AP001469.3	0.0677492	0.435885	2.68567	1.45074e-22	2.27808e-21
AL365181.3	0.226268	4.24174	4.22855	7.5794e-18	3.50853e-17
AC008870.2	0.0839333	0.309759	1.88383	4.24005e-18	2.06254e-17
AC022762.2	0.129668	0.351209	1.43751	3.13357e-13	8.52451e-13
C1orf220	0.0703057	0.274948	1.96745	2.71804e-14	8.2548e-14
AC127024.4	0.0768169	0.309317	2.00959	9.53991e-13	2.47219e-12
AC132192.2	0.117529	0.973848	3.05069	4.7801e-28	4.41422e-25
HCG15	0.0838055	0.262344	1.64634	1.09843e-05	1.54534e-05
TAF1A-AS1	0.747174	1.49903	1.00451	1.23433e-09	2.30408e-09
MUC20-OT1	0.327767	0.84424	1.36498	5.79591e-18	2.72693e-17
LINC02870	0.00589173	0.312604	5.7295	0.000586483	0.000726302
AC006504.7	0.201836	0.729382	1.85349	7.09822e-16	2.57872e-15
AL365330.1	0.376062	0.925295	1.29894	1.51312e-11	3.44656e-11
ARRDC1-AS1	1.5275	3.56904	1.22436	8.45237e-24	2.2053e-22
ZNF426-DT	0.101261	0.390624	1.9477	5.97095e-08	9.70914e-08
AC005005.3	0.0674937	0.241105	1.83684	3.51229e-12	8.57894e-12
LYRM4-AS1	0.336933	0.836039	1.31111	3.17912e-14	9.57909e-14
PITPNA-AS1	1.65081	4.43362	1.42531	6.22761e-16	2.27685e-15
AC011468.1	0.290868	1.16925	2.00715	8.4438e-19	4.68284e-18
GIHCG	0.38911	1.92502	2.30662	3.98685e-24	1.20321e-22
GABPB1-AS1	0.253217	0.524683	1.05107	1.61907e-11	3.6733e-11
AC106897.1	0.120528	0.403119	1.74184	4.62323e-10	8.84579e-10
ZNF528-AS1	0.122169	0.398813	1.70683	1.69756e-05	2.34512e-05
KDM4A-AS1	0.115139	0.426558	1.88936	5.80115e-19	3.38057e-18
AC003965.1	0.11046	0.26834	1.28054	0.00111279	0.00134756
AC131009.1	0.124192	0.502793	2.01739	1.29408e-13	3.65013e-13
AC092118.2	0.138832	0.343129	1.30541	2.15674e-10	4.21078e-10
AL662791.1	0.127445	0.421657	1.72619	6.04172e-06	8.61602e-06
AC020915.1	0.0599808	0.265919	2.14841	3.67886e-14	1.09697e-13
AC145207.8	0.0451904	0.452151	3.32271	3.85932e-12	9.38666e-12
ZNF32-AS1	0.0610343	0.223177	1.87049	8.77079e-12	2.04652e-11
HCG18	0.341767	0.924909	1.4363	2.00649e-18	1.04228e-17
AC091271.1	0.670871	1.47953	1.14103	2.29842e-08	3.84633e-08
Z95115.1	0.339388	1.00934	1.57241	5.81562e-14	1.69021e-13
MAN1B1-DT	0.292327	0.618133	1.08033	1.54033e-09	2.84292e-09
AC009549.1	0.0995864	0.32797	1.71954	2.91461e-11	6.33707e-11
U62317.3	0.0771659	0.242032	1.64916	0.00282688	0.00333875
HM13-IT1	0.191099	0.402452	1.0745	2.13041e-06	3.12351e-06
AC068580.1	0.204722	0.892079	2.1235	2.96742e-13	8.11095e-13
AC131009.2	0.11017	0.437011	1.98794	0.00195622	0.00233931
LINC00896	0.0944822	0.652229	2.78726	7.72104e-11	1.60148e-10
AC073655.2	0.0725148	0.265953	1.87482	1.82731e-16	7.08699e-16
AC138207.2	0.16319	0.450991	1.46654	1.16589e-08	1.99174e-08
MIR4453HG	0.201287	0.509257	1.33914	9.03415e-16	3.23091e-15
AC092171.4	0.0514404	0.476922	3.21278	3.13809e-25	1.56632e-23
HOXB-AS1	0.0977699	0.295474	1.59557	5.73334e-08	9.34926e-08
AL021707.6	0.447574	1.21348	1.43896	5.46814e-12	1.29431e-11
ZSCAN16-AS1	3.4432	7.50092	1.12332	1.63612e-12	4.15546e-12
AC010618.3	0.122001	0.308705	1.33933	1.08185e-15	3.79805e-15
AC078846.1	0.0875654	0.27741	1.66359	2.48431e-25	1.35809e-23
CCDC18-AS1	0.248727	1.02418	2.04184	6.25806e-23	1.1544e-21
PTOV1-AS1	0.473182	1.23199	1.38052	4.83831e-23	9.45224e-22
AL356056.2	0.0875822	0.320232	1.87041	3.92067e-08	6.47616e-08
AC009005.1	0.189461	1.41392	2.89973	3.68665e-20	2.89882e-19
AL596244.1	0.166555	0.44668	1.42324	9.89135e-12	2.29864e-11
ZNF433-AS1	0.0833179	0.265898	1.67418	3.68666e-20	2.89882e-19
AC010834.3	0.120302	0.360451	1.58314	2.02109e-12	5.07704e-12
SLC25A21-AS1	0.154568	0.412409	1.41584	6.5319e-08	1.05318e-07
AC092171.5	0.415698	1.57304	1.91995	1.34885e-17	5.95568e-17
AC063938.1	0.429367	0.208783	-1.0402	2.54561e-12	6.29819e-12
LINC01943	0.0709418	0.352903	2.31456	7.25194e-17	2.93142e-16
AC002456.1	0.52978	1.38434	1.38573	8.83896e-05	0.000115308
AL021707.2	0.0525351	0.256068	2.28517	3.51111e-21	3.91335e-20
AL121899.1	0.318121	2.3906	2.90972	1.10956e-19	7.91167e-19
ZFAS1	6.45919	19.5377	1.59684	1.37784e-17	6.03724e-17
AC005261.1	1.63538	3.93295	1.26598	2.64751e-23	5.6983e-22
AC004148.1	0.262708	0.790841	1.58993	1.07108e-15	3.77179e-15
LINC00910	0.191086	0.410109	1.10179	2.38484e-11	5.24482e-11
AC138356.1	0.811359	0.235932	-1.78197	7.7019e-23	1.35641e-21
AL139289.1	0.143987	0.528725	1.87658	3.93029e-16	1.4745e-15
AL691482.3	0.158007	0.49574	1.6496	9.04812e-05	0.000117769
AC124283.2	0.0858226	0.307267	1.84007	2.9229e-11	6.34307e-11
AL353796.1	0.163292	0.404997	1.31046	6.9567e-18	3.24646e-17
AC012073.1	0.13769	0.523905	1.92788	2.47549e-12	6.15121e-12
AL049840.5	2.0573	5.37517	1.38556	1.62719e-19	1.13213e-18
AP002336.2	0.114238	0.247763	1.11692	2.28522e-07	3.51667e-07
ZKSCAN2-DT	0.0618838	0.381901	2.62556	1.42282e-26	1.48491e-24
AC008610.1	0.197255	1.03035	2.38499	9.01991e-19	4.90751e-18
PCAT6	0.417314	2.05274	2.29835	5.73713e-19	3.36032e-18
AC005393.1	0.0351477	0.271851	2.95131	1.68024e-19	1.14816e-18
AC010331.1	0.119088	0.606362	2.34815	7.63153e-22	9.84396e-21
ATP2A1-AS1	0.0633183	0.498605	2.9772	2.7546e-16	1.05409e-15
LINC02298	0.129878	0.703709	2.43782	8.98336e-05	0.000117059
EIF2AK3-DT	0.175961	0.407395	1.21117	1.3965e-13	3.92938e-13
AC073046.1	0.187461	0.391187	1.06127	0.000711524	0.000877368
AL928654.2	0.307821	0.91663	1.57425	9.10844e-12	2.12099e-11
TMCC1-AS1	0.0564185	0.273121	2.2753	3.72089e-22	5.33947e-21
AL031985.3	0.218939	0.7233	1.72407	8.17655e-20	6.0171e-19
AL022328.1	0.317449	0.790558	1.31635	1.96577e-11	4.39047e-11
AP000873.1	0.111756	0.36177	1.69472	1.26936e-22	2.05243e-21
GCC2-AS1	0.109148	0.299138	1.45453	1.41715e-06	2.11559e-06
SNHG17	1.42856	3.70329	1.37424	3.19099e-16	1.213e-15
AL358472.3	0.211819	0.606133	1.5168	7.46427e-15	2.40702e-14
LINC00221	0.00271213	1.10443	8.66966	1.58808e-07	2.48043e-07
SNHG29	18.1646	37.6602	1.05191	5.89336e-08	9.59656e-08
TMEM147-AS1	0.183058	0.685395	1.90464	3.37967e-22	4.97418e-21
ZBTB11-AS1	0.275846	0.674919	1.29085	1.87322e-20	1.58122e-19
LINC00942	0.00614997	1.5556	7.98268	1.00537e-08	1.73559e-08
AC009065.5	0.0930333	0.275774	1.56767	0.00164106	0.00197685
AC096733.2	0.124975	0.270541	1.11421	2.6745e-08	4.45621e-08
AC133644.1	0.0479839	0.407608	3.08656	3.35839e-09	6.01472e-09
AC011462.4	0.0791419	0.516274	2.70562	1.75904e-20	1.51833e-19
AC008736.1	0.374566	1.09031	1.54144	2.28736e-12	5.7209e-12
AC061992.2	0.0959975	0.300724	1.64737	0.0301649	0.0334583
AP000892.3	0.0810044	0.336562	2.0548	4.36481e-13	1.17349e-12
AC040977.1	1.059	3.02816	1.51575	2.99985e-18	1.49083e-17
AL355987.4	0.0326826	0.26679	3.02911	7.80083e-17	3.13124e-16
AC138230.1	0.110696	0.265343	1.26126	1.91245e-10	3.7594e-10
AL021878.2	0.116443	0.352564	1.59826	4.44592e-12	1.06776e-11
AL023803.1	0.581269	1.52573	1.39222	2.42668e-05	3.32438e-05
LINC00265	0.106318	0.263132	1.3074	1.79085e-06	2.64594e-06
AC006504.5	0.142122	0.376579	1.40582	1.82055e-19	1.22222e-18
AC020765.2	0.257708	0.923857	1.84193	4.1136e-19	2.55266e-18
AC126118.1	0.0330074	0.230655	2.80487	1.20585e-18	6.46875e-18
SBNO1-AS1	0.132302	0.357592	1.43448	6.69404e-14	1.93084e-13
AC133919.2	0.0872101	0.465218	2.41534	9.30993e-09	1.61204e-08
AC090589.3	0.359482	0.774625	1.10758	5.67429e-08	9.26612e-08
SNHG21	0.193549	0.642201	1.73032	6.91736e-21	6.78729e-20
SFTA1P	0.00295924	0.367185	6.95514	1.03584e-27	4.41422e-25
AC007220.1	0.11588	0.283421	1.29031	0.00380384	0.00445593
AC008735.2	0.370896	1.54677	2.06017	6.95639e-16	2.53522e-15
C2CD4D-AS1	1.02842	4.63834	2.17318	5.25092e-19	3.10725e-18
AC040173.1	0.0226129	0.296362	3.71214	0.000798501	0.00097727
ZNF529-AS1	0.294109	0.914214	1.63618	1.19394e-20	1.05434e-19
C2-AS1	0.245822	0.628038	1.35324	6.05603e-08	9.80582e-08
GAS5	6.02765	33.7298	2.48436	3.75045e-25	1.72221e-23
GATA2-AS1	0.0833501	0.394349	2.24222	5.49533e-05	7.36131e-05
HCG14	0.143999	0.300767	1.06258	0.0120865	0.0137243
C2orf49-DT	0.100781	0.287774	1.51372	1.78015e-19	1.20212e-18
AC012615.6	0.111174	0.305467	1.4582	3.39639e-09	6.07329e-09
AC055855.1	0.0677438	0.220244	1.70094	3.55737e-10	6.84064e-10
KMT2E-AS1	2.38769	5.90002	1.30511	1.51764e-13	4.24939e-13
AC107959.3	0.0666197	0.506232	2.92578	2.15391e-10	4.21078e-10
AL390728.5	0.99226	3.9998	2.01114	1.77966e-18	9.37181e-18
MELTF-AS1	0.112246	0.961025	3.09791	7.08038e-21	6.88837e-20
AL645608.8	0.0445568	0.30021	2.75226	7.45736e-09	1.30703e-08
AP005057.1	0.0215762	0.40016	4.21306	1.10237e-08	1.88884e-08
AC027796.4	0.106294	0.583389	2.4564	1.25125e-17	5.58923e-17
AC026471.2	0.131304	0.359831	1.45441	2.46607e-11	5.41309e-11
U62317.1	1.54593	3.76831	1.28544	5.74476e-16	2.12058e-15
AP001062.1	0.104654	0.308493	1.5596	4.72179e-15	1.55765e-14
HSD11B1-AS1	1.33292	3.54703	1.41202	0.000441901	0.000552617
AC010531.6	0.378412	0.970835	1.35927	1.93887e-06	2.85362e-06
AC136475.2	0.532915	1.35071	1.34174	7.27035e-13	1.90992e-12
SNHG11	1.67099	5.16107	1.62697	3.38771e-23	7.07107e-22
AC022400.1	0.0843539	0.266964	1.66212	4.07705e-12	9.87437e-12
LINC02035	0.291287	0.618881	1.08722	1.7098e-10	3.3784e-10
AC092295.2	0.254915	0.579011	1.18357	1.79173e-11	4.03316e-11
MIR4458HG	0.66621	1.56053	1.22798	1.9491e-09	3.57439e-09
AC016065.1	0.199205	0.475102	1.25398	3.17612e-17	1.34051e-16
AL138756.1	0.163564	0.445896	1.44685	2.77271e-11	6.03998e-11
AC002550.2	0.118621	0.422029	1.83098	1.60509e-17	7.00625e-17
AC008549.1	23.3809	11.3131	-1.04734	3.87525e-14	1.15254e-13
SCAMP1-AS1	1.01873	2.34276	1.20144	9.68916e-20	7.08481e-19
AL359504.1	0.175786	0.544795	1.63189	6.38762e-14	1.8471e-13
AC008735.4	0.0865364	0.274306	1.66441	1.48402e-11	3.39374e-11
AC100872.2	0.0175567	0.250423	3.83428	7.10609e-11	1.48865e-10
SNHG20	0.361795	1.2887	1.83268	3.88786e-24	1.20321e-22
AL513320.1	0.0459087	0.330421	2.84747	4.96054e-21	5.08455e-20
AC016747.1	1.09089	2.80953	1.36483	8.59921e-27	1.2672e-24
THUMPD3-AS1	0.417553	1.43406	1.78007	6.8486e-25	2.91193e-23
AC055822.1	0.22162	0.704284	1.66807	4.86351e-14	1.43162e-13
STIM1-AS1	0.486699	1.00929	1.05224	4.96033e-08	8.12334e-08
ZNF793-AS1	0.1002	0.571155	2.51099	0.00059752	0.000739174
LINC02889	0.246056	0.899713	1.87048	0.000428647	0.000536627
AL356234.2	0.0539799	0.826058	3.93575	7.62463e-14	2.18461e-13
MHENCR	1.64299	4.40803	1.42381	4.8306e-17	1.98054e-16
AC006213.5	0.103266	0.378892	1.87542	3.08863e-06	4.48829e-06
AC073195.1	0.0923372	0.374862	2.02137	2.74333e-21	3.18115e-20
AC242426.2	0.268882	0.904868	1.75073	5.19135e-20	3.97312e-19
AC110285.2	0.228376	1.53948	2.75297	3.55984e-19	2.24544e-18
AC004908.1	0.100147	0.266417	1.41157	6.37196e-08	1.03028e-07
AC006547.1	0.214851	0.606516	1.49721	1.12216e-19	7.9521e-19
SUGT1-DT	0.0844164	0.434985	2.36537	4.27904e-23	8.61813e-22
PXN-AS1	0.720148	1.89468	1.39559	4.65125e-21	4.99031e-20
BAIAP2-DT	1.71926	4.87798	1.50449	8.92173e-19	4.87721e-18
AC004816.1	0.145398	0.996639	2.77707	1.31647e-22	2.09904e-21
DLGAP1-AS2	0.118166	0.420092	1.82989	7.68489e-15	2.47122e-14
GSEC	0.130251	0.518021	1.99172	2.66235e-18	1.33466e-17
AC107375.1	0.162585	0.732007	2.17066	9.90709e-26	6.6902e-24
AC011477.2	0.542014	1.39663	1.36555	2.86198e-09	5.18227e-09
AC099850.3	0.183166	2.08155	3.50644	3.81021e-18	1.86133e-17
AP003392.3	0.191844	0.392082	1.03122	5.94318e-05	7.90588e-05
AC092953.2	0.18004	0.409432	1.18531	1.55198e-09	2.85982e-09
AC020978.4	4.69738	2.1716	-1.1131	1.64347e-15	5.60166e-15
AC064807.4	0.280908	0.688472	1.2933	6.03624e-08	9.78758e-08
DNAH10OS	0.081796	0.287515	1.81353	8.05528e-09	1.40326e-08
AC090970.2	0.148685	0.376381	1.33993	5.9007e-06	8.42538e-06
AC007038.1	0.177519	0.604213	1.76709	3.11438e-19	2.0086e-18
AL359921.2	0.474474	1.73402	1.86972	1.10095e-20	9.79764e-20

## Sheet: Supplementary Table 6
Supplementary Table 6. The results of a seventeen-ferroptosis-associated lncRNA signature using a multivariate Cox analysis.
Multivariate Cox analysis
id	coef	HR	HR.95L	HR.95H	pvalue
`POLH-AS1`	0.918206	2.50479	1.41501	4.43387	0.00162501
SNHG10	0.193511	1.2135	0.999085	1.47394	0.0510879
AL139384.1	0.236423	1.26671	1.08912	1.47326	0.00215783
AL928654.1	0.575391	1.77783	1.13911	2.77468	0.0112952
AL603839.3	0.253399	1.2884	1.03074	1.61046	0.0260199
AC099850.1	-0.534157	0.586163	0.275165	1.24866	0.166234
`MKLN1-AS`	0.913109	2.49206	1.50443	4.12804	0.000391077
LINC00205	-0.238002	0.788201	0.643557	0.965355	0.0214015
AC026401.3	-0.0869103	0.916759	0.845119	0.994472	0.0363059
AC090772.3	0.250495	1.28466	1.02024	1.61761	0.033139
`ZFPM2-AS1`	0.0795991	1.08285	1.02748	1.14121	0.00295826
AP001469.3	0.537425	1.71159	0.93175	3.14414	0.0832509
AC145207.8	-0.154272	0.857039	0.725258	1.01276	0.0701315
AC012073.1	0.249765	1.28372	0.986988	1.66967	0.0625601
AL031985.3	0.373229	1.45242	1.03936	2.02963	0.0288093
LINC00942	0.0477589	1.04892	1.0183	1.08046	0.00157963
SNHG21	-0.401137	0.669558	0.413213	1.08493	0.103327
Univariate COX analysis
gene	HR	HR.95L	HR.95H	pvalue
POLH-AS1	2.53404	1.68732	3.80565	7.42042e-06
AC026356.1	4.25643	2.29654	7.88889	4.20673e-06
DNAJC9-AS1	2.56497	1.58604	4.14808	0.000122739
SNHG10	1.29653	1.12791	1.49036	0.000258992
MIR210HG	1.14075	1.0677	1.21879	9.61162e-05
LUCAT1	1.1787	1.0945	1.26938	1.37405e-05
AC116025.2	1.88835	1.37123	2.60048	9.87324e-05
AC124798.1	1.21642	1.09001	1.35748	0.000465975
SREBF2-AS1	1.45836	1.16984	1.81804	0.000794755
AL139384.1	1.23635	1.10895	1.37838	0.000131366
AL928654.1	1.90931	1.32354	2.75434	0.000541679
AP003469.2	1.32545	1.13472	1.54824	0.000379007
AC125437.1	2.51266	1.57746	4.00228	0.000104863
AC018690.1	2.10374	1.43468	3.08482	0.000140019
AL603839.3	1.35983	1.14057	1.62123	0.000612307
ZEB1-AS1	1.46189	1.1794	1.81203	0.000527989
NRAV	1.2347	1.1296	1.34959	3.40826e-06
AC099850.1	2.24952	1.41271	3.58199	0.000636297
LINC01138	1.39979	1.20323	1.62847	1.32256e-05
AC009779.2	1.17729	1.09216	1.26906	2.02727e-05
ZNF337-AS1	2.76314	1.56591	4.87571	0.00045192
MKLN1-AS	3.37753	2.28509	4.99223	1.02638e-09
PRRT3-AS1	1.09534	1.0419	1.15153	0.000359635
LINC00205	1.23451	1.1011	1.38407	0.000305496
LINC02561	1.42312	1.16734	1.73494	0.000481787
RHPN1-AS1	1.68093	1.25526	2.25094	0.000490411
AC026401.3	1.08611	1.03843	1.13599	0.000310758
AL355574.1	1.29017	1.1206	1.48541	0.000394545
NCK1-DT	1.53111	1.22695	1.91068	0.00016318
AC107068.1	2.05507	1.39765	3.02171	0.00025018
LNCSRLR	2.25986	1.59745	3.19695	4.09481e-06
AC068473.5	1.4126	1.18498	1.68396	0.000116626
LINC01011	1.99652	1.32599	3.00614	0.000928733
BACE1-AS	1.21334	1.09954	1.33892	0.000118829
AC090772.3	1.41136	1.19377	1.66862	5.50319e-05
SNHG4	1.48215	1.28392	1.71099	7.80591e-08
ZFPM2-AS1	1.09609	1.05617	1.13752	1.25425e-06
MED8-AS1	2.44816	1.5264	3.92655	0.000203584
AL590705.3	2.00566	1.34257	2.99624	0.000677707
AC074117.1	1.47801	1.20664	1.81041	0.000160097
AC034229.4	1.98718	1.41486	2.79101	7.42247e-05
SNHG3	1.06879	1.03915	1.09927	3.53522e-06
HMGN3-AS1	2.14799	1.43587	3.2133	0.000198875
AC145207.5	1.77077	1.36827	2.29169	1.40521e-05
LINC01224	1.86891	1.411	2.47542	1.29473e-05
FOXD2-AS1	1.15403	1.06242	1.25354	0.000687105
MYG1-AS1	1.51753	1.2073	1.90746	0.000350854
AL451069.3	1.13201	1.05258	1.21745	0.000836929
AP001469.3	1.98712	1.33818	2.95074	0.000663853
AC006504.7	1.39219	1.15768	1.67422	0.000438679
KDM4A-AS1	2.85183	1.89762	4.28586	4.60407e-07
AC131009.1	1.81232	1.39917	2.34747	6.65789e-06
AC145207.8	1.17867	1.08355	1.28215	0.000128664
AC009005.1	1.16456	1.07259	1.26442	0.000283843
AC012073.1	1.41224	1.2321	1.61871	7.12294e-07
TMCC1-AS1	2.64072	1.8462	3.77717	1.05235e-07
AL031985.3	1.87921	1.54689	2.28294	2.10454e-10
ZBTB11-AS1	2.17074	1.38622	3.39924	0.000706113
LINC00942	1.03677	1.02071	1.05307	5.76731e-06
SNHG21	1.72518	1.26356	2.35544	0.000598367
AC107959.3	1.34887	1.13808	1.59871	0.000556876
AC100872.2	1.51485	1.23712	1.85493	5.84099e-05
AL513320.1	2.20265	1.38535	3.50214	0.000844866
THUMPD3-AS1	1.38138	1.18187	1.61457	4.91654e-05
GSEC	1.71455	1.3278	2.21396	3.56857e-05
AC099850.3	1.14451	1.09263	1.19885	1.17564e-08

## Sheet: Supplementary Table 7
Supplementary Table 7. The activation states of biological pathways in distinct risk subtype by GSEA enrichment analysis.
gsea_report_for_h_
NAME	GS<br> follow link to MSigDB	GS DETAILS	SIZE	ES	NES	NOM p-val	FDR q-val	FWER p-val	RANK AT MAX	LEADING EDGE
KEGG_N_GLYCAN_BIOSYNTHESIS	KEGG_N_GLYCAN_BIOSYNTHESIS	Details ...	46	0.655144	1.93205	0	0.013117	0.038	12545	tags=67%, list=23%, signal=87%
KEGG_BASAL_TRANSCRIPTION_FACTORS	KEGG_BASAL_TRANSCRIPTION_FACTORS	Details ...	35	0.704232	1.94178	0	0.0133315	0.036	13997	tags=86%, list=25%, signal=115%
KEGG_UBIQUITIN_MEDIATED_PROTEOLYSIS	KEGG_UBIQUITIN_MEDIATED_PROTEOLYSIS	Details ...	135	0.675523	2.03164	0	0.0144642	0.015	13233	tags=73%, list=24%, signal=96%
KEGG_SPLICEOSOME	KEGG_SPLICEOSOME	Details ...	127	0.748609	1.96485	0	0.0171624	0.025	5538	tags=71%, list=10%, signal=79%
KEGG_PURINE_METABOLISM	KEGG_PURINE_METABOLISM	Details ...	159	0.518032	1.88268	0	0.0175064	0.078	10585	tags=44%, list=19%, signal=54%
KEGG_PROGESTERONE_MEDIATED_OOCYTE_MATURATION	KEGG_PROGESTERONE_MEDIATED_OOCYTE_MATURATION	Details ...	85	0.615626	1.94633	0	0.0178083	0.034	6897	tags=47%, list=12%, signal=54%
KEGG_ENDOCYTOSIS	KEGG_ENDOCYTOSIS	Details ...	181	0.604134	1.98435	0	0.0178153	0.022	12485	tags=55%, list=23%, signal=70%
KEGG_RNA_DEGRADATION	KEGG_RNA_DEGRADATION	Details ...	59	0.666737	1.8914	0	0.0184055	0.071	10402	tags=68%, list=19%, signal=83%
KEGG_HOMOLOGOUS_RECOMBINATION	KEGG_HOMOLOGOUS_RECOMBINATION	Details ...	28	0.780938	1.88345	0	0.0190114	0.078	7030	tags=79%, list=13%, signal=90%
KEGG_NUCLEOTIDE_EXCISION_REPAIR	KEGG_NUCLEOTIDE_EXCISION_REPAIR	Details ...	44	0.68837	1.84759	0	0.0206635	0.106	11289	tags=75%, list=20%, signal=94%
KEGG_NEUROTROPHIN_SIGNALING_PATHWAY	KEGG_NEUROTROPHIN_SIGNALING_PATHWAY	Details ...	126	0.590209	1.83163	0	0.0209603	0.123	12765	tags=57%, list=23%, signal=74%
KEGG_SNARE_INTERACTIONS_IN_VESICULAR_TRANSPORT	KEGG_SNARE_INTERACTIONS_IN_VESICULAR_TRANSPORT	Details ...	38	0.638946	1.83243	0	0.0217315	0.122	11867	tags=63%, list=21%, signal=80%
KEGG_PYRIMIDINE_METABOLISM	KEGG_PYRIMIDINE_METABOLISM	Details ...	98	0.568496	1.84885	0	0.0238425	0.106	10282	tags=52%, list=19%, signal=64%
KEGG_CELL_CYCLE	KEGG_CELL_CYCLE	Details ...	125	0.736382	2.04111	0	0.024334	0.012	6934	tags=70%, list=13%, signal=79%
KEGG_THYROID_CANCER	KEGG_THYROID_CANCER	Details ...	29	0.636238	1.75685	0	0.0277652	0.224	14172	tags=66%, list=26%, signal=88%
KEGG_INSULIN_SIGNALING_PATHWAY	KEGG_INSULIN_SIGNALING_PATHWAY	Details ...	137	0.497747	1.76964	0	0.031624	0.201	12794	tags=46%, list=23%, signal=60%
KEGG_ERBB_SIGNALING_PATHWAY	KEGG_ERBB_SIGNALING_PATHWAY	Details ...	87	0.576333	1.83558	0.00195312	0.0224456	0.117	14679	tags=56%, list=27%, signal=77%
KEGG_WNT_SIGNALING_PATHWAY	KEGG_WNT_SIGNALING_PATHWAY	Details ...	151	0.537571	1.75772	0.00197239	0.029115	0.222	12848	tags=47%, list=23%, signal=61%
KEGG_VASOPRESSIN_REGULATED_WATER_REABSORPTION	KEGG_VASOPRESSIN_REGULATED_WATER_REABSORPTION	Details ...	44	0.620839	1.7615	0.00197628	0.0313222	0.213	8967	tags=52%, list=16%, signal=62%
KEGG_OOCYTE_MEIOSIS	KEGG_OOCYTE_MEIOSIS	Details ...	113	0.603124	1.94599	0.0019802	0.0148402	0.034	11441	tags=58%, list=21%, signal=72%
KEGG_MTOR_SIGNALING_PATHWAY	KEGG_MTOR_SIGNALING_PATHWAY	Details ...	52	0.623727	1.90601	0.00199601	0.0160099	0.055	11539	tags=58%, list=21%, signal=73%
KEGG_NOTCH_SIGNALING_PATHWAY	KEGG_NOTCH_SIGNALING_PATHWAY	Details ...	47	0.609999	1.72015	0.0020202	0.0356206	0.311	12265	tags=57%, list=22%, signal=74%
KEGG_AMINOACYL_TRNA_BIOSYNTHESIS	KEGG_AMINOACYL_TRNA_BIOSYNTHESIS	Details ...	41	0.685567	1.84846	0.00389105	0.0221395	0.106	10735	tags=73%, list=19%, signal=91%
KEGG_MISMATCH_REPAIR	KEGG_MISMATCH_REPAIR	Details ...	23	0.779841	1.78327	0.00392927	0.029993	0.183	6384	tags=78%, list=12%, signal=88%
KEGG_INOSITOL_PHOSPHATE_METABOLISM	KEGG_INOSITOL_PHOSPHATE_METABOLISM	Details ...	54	0.615632	1.81881	0.00393701	0.0235245	0.142	13600	tags=65%, list=25%, signal=86%
KEGG_SELENOAMINO_ACID_METABOLISM	KEGG_SELENOAMINO_ACID_METABOLISM	Details ...	26	0.621873	1.84621	0.00398406	0.0194907	0.106	7144	tags=54%, list=13%, signal=62%
KEGG_ADHERENS_JUNCTION	KEGG_ADHERENS_JUNCTION	Details ...	73	0.609434	1.79606	0.00399202	0.0275365	0.162	12197	tags=58%, list=22%, signal=74%
KEGG_ENDOMETRIAL_CANCER	KEGG_ENDOMETRIAL_CANCER	Details ...	52	0.591848	1.75805	0.00402414	0.0299269	0.222	15322	tags=62%, list=28%, signal=85%
KEGG_REGULATION_OF_AUTOPHAGY	KEGG_REGULATION_OF_AUTOPHAGY	Details ...	35	0.579037	1.81047	0.00417537	0.0239278	0.153	15890	tags=46%, list=29%, signal=64%
KEGG_TIGHT_JUNCTION	KEGG_TIGHT_JUNCTION	Details ...	132	0.502091	1.72818	0.00576923	0.0347102	0.295	18600	tags=56%, list=34%, signal=84%
KEGG_DNA_REPLICATION	KEGG_DNA_REPLICATION	Details ...	36	0.77117	1.75736	0.00579151	0.0284596	0.224	9554	tags=86%, list=17%, signal=104%
KEGG_CHRONIC_MYELOID_LEUKEMIA	KEGG_CHRONIC_MYELOID_LEUKEMIA	Details ...	73	0.587919	1.74799	0.00594059	0.0302817	0.248	15322	tags=63%, list=28%, signal=87%
KEGG_GLYCOSYLPHOSPHATIDYLINOSITOL_GPI_ANCHOR_BIOSYNTHESIS	KEGG_GLYCOSYLPHOSPHATIDYLINOSITOL_GPI_ANCHOR_BIOSYNTHESIS	Details ...	25	0.647232	1.72977	0.00598802	0.035209	0.293	11265	tags=68%, list=20%, signal=85%
KEGG_GLIOMA	KEGG_GLIOMA	Details ...	65	0.53998	1.70698	0.00608519	0.0340855	0.339	16650	tags=57%, list=30%, signal=81%
KEGG_VIBRIO_CHOLERAE_INFECTION	KEGG_VIBRIO_CHOLERAE_INFECTION	Details ...	54	0.543558	1.70972	0.00775194	0.0358768	0.334	20810	tags=74%, list=38%, signal=119%
KEGG_P53_SIGNALING_PATHWAY	KEGG_P53_SIGNALING_PATHWAY	Details ...	68	0.517732	1.69004	0.00775194	0.037954	0.374	15818	tags=60%, list=29%, signal=84%
KEGG_PHOSPHATIDYLINOSITOL_SIGNALING_SYSTEM	KEGG_PHOSPHATIDYLINOSITOL_SIGNALING_SYSTEM	Details ...	76	0.585839	1.77747	0.00793651	0.030827	0.193	12895	tags=55%, list=23%, signal=72%
KEGG_GNRH_SIGNALING_PATHWAY	KEGG_GNRH_SIGNALING_PATHWAY	Details ...	101	0.50751	1.6768	0.00796813	0.041373	0.396	16751	tags=53%, list=30%, signal=77%
KEGG_BASE_EXCISION_REPAIR	KEGG_BASE_EXCISION_REPAIR	Details ...	35	0.666387	1.76841	0.00956023	0.0306392	0.202	10190	tags=66%, list=18%, signal=81%
KEGG_EPITHELIAL_CELL_SIGNALING_IN_HELICOBACTER_PYLORI_INFECTION	KEGG_EPITHELIAL_CELL_SIGNALING_IN_HELICOBACTER_PYLORI_INFECTION	Details ...	68	0.550555	1.71191	0.00970874	0.0359894	0.328	8971	tags=46%, list=16%, signal=54%
KEGG_PATHWAYS_IN_CANCER	KEGG_PATHWAYS_IN_CANCER	Details ...	325	0.497749	1.70766	0.00978474	0.0347136	0.338	12203	tags=41%, list=22%, signal=52%
KEGG_RENAL_CELL_CARCINOMA	KEGG_RENAL_CELL_CARCINOMA	Details ...	70	0.577068	1.74045	0.00982318	0.0320179	0.268	12765	tags=54%, list=23%, signal=70%
KEGG_NON_SMALL_CELL_LUNG_CANCER	KEGG_NON_SMALL_CELL_LUNG_CANCER	Details ...	54	0.565969	1.70871	0.0101626	0.0352702	0.335	15322	tags=56%, list=28%, signal=77%
KEGG_LONG_TERM_POTENTIATION	KEGG_LONG_TERM_POTENTIATION	Details ...	70	0.524485	1.71475	0.0118577	0.0358981	0.323	14544	tags=51%, list=26%, signal=70%
KEGG_RIG_I_LIKE_RECEPTOR_SIGNALING_PATHWAY	KEGG_RIG_I_LIKE_RECEPTOR_SIGNALING_PATHWAY	Details ...	71	0.533908	1.71643	0.0134875	0.0363188	0.322	8971	tags=38%, list=16%, signal=45%
KEGG_SMALL_CELL_LUNG_CANCER	KEGG_SMALL_CELL_LUNG_CANCER	Details ...	84	0.563711	1.76097	0.0136452	0.0303549	0.215	9011	tags=45%, list=16%, signal=54%
KEGG_PANCREATIC_CANCER	KEGG_PANCREATIC_CANCER	Details ...	70	0.567695	1.67382	0.013834	0.0417106	0.405	12485	tags=50%, list=23%, signal=64%
KEGG_GLYCEROPHOSPHOLIPID_METABOLISM	KEGG_GLYCEROPHOSPHOLIPID_METABOLISM	Details ...	77	0.445723	1.5767	0.0142276	0.0764566	0.629	17073	tags=53%, list=31%, signal=77%
KEGG_CYTOSOLIC_DNA_SENSING_PATHWAY	KEGG_CYTOSOLIC_DNA_SENSING_PATHWAY	Details ...	55	0.547604	1.70016	0.0151229	0.0346377	0.346	15766	tags=42%, list=29%, signal=58%
KEGG_LYSOSOME	KEGG_LYSOSOME	Details ...	121	0.533562	1.687	0.0160643	0.0383132	0.378	16467	tags=60%, list=30%, signal=85%
KEGG_SPHINGOLIPID_METABOLISM	KEGG_SPHINGOLIPID_METABOLISM	Details ...	39	0.545961	1.6437	0.0162602	0.0497464	0.47	18475	tags=69%, list=33%, signal=104%
KEGG_MELANOGENESIS	KEGG_MELANOGENESIS	Details ...	101	0.470407	1.56663	0.0182186	0.07544	0.641	14274	tags=44%, list=26%, signal=59%
KEGG_RNA_POLYMERASE	KEGG_RNA_POLYMERASE	Details ...	29	0.622557	1.64759	0.0186567	0.0490262	0.463	14928	tags=72%, list=27%, signal=99%
KEGG_PROSTATE_CANCER	KEGG_PROSTATE_CANCER	Details ...	89	0.507977	1.65319	0.0189394	0.0487783	0.453	15322	tags=53%, list=28%, signal=73%
KEGG_BLADDER_CANCER	KEGG_BLADDER_CANCER	Details ...	42	0.544589	1.60138	0.0200803	0.066854	0.57	19581	tags=64%, list=35%, signal=99%
KEGG_GLYCOSPHINGOLIPID_BIOSYNTHESIS_GANGLIO_SERIES	KEGG_GLYCOSPHINGOLIPID_BIOSYNTHESIS_GANGLIO_SERIES	Details ...	15	0.629861	1.64317	0.021611	0.0491591	0.471	9758	tags=53%, list=18%, signal=65%
KEGG_COLORECTAL_CANCER	KEGG_COLORECTAL_CANCER	Details ...	62	0.564672	1.66519	0.0217822	0.0446508	0.426	6056	tags=39%, list=11%, signal=43%
KEGG_VEGF_SIGNALING_PATHWAY	KEGG_VEGF_SIGNALING_PATHWAY	Details ...	76	0.490424	1.63195	0.0232108	0.0538438	0.498	16373	tags=50%, list=30%, signal=71%
KEGG_FC_GAMMA_R_MEDIATED_PHAGOCYTOSIS	KEGG_FC_GAMMA_R_MEDIATED_PHAGOCYTOSIS	Details ...	96	0.561292	1.65118	0.0279441	0.0485681	0.455	9538	tags=46%, list=17%, signal=55%
KEGG_ACUTE_MYELOID_LEUKEMIA	KEGG_ACUTE_MYELOID_LEUKEMIA	Details ...	57	0.520412	1.57564	0.0288462	0.0756433	0.63	14429	tags=54%, list=26%, signal=74%
KEGG_REGULATION_OF_ACTIN_CYTOSKELETON	KEGG_REGULATION_OF_ACTIN_CYTOSKELETON	Details ...	213	0.478155	1.60195	0.0290698	0.0678049	0.57	12069	tags=40%, list=22%, signal=51%
KEGG_MAPK_SIGNALING_PATHWAY	KEGG_MAPK_SIGNALING_PATHWAY	Details ...	267	0.452803	1.59353	0.0292969	0.0694619	0.589	16529	tags=48%, list=30%, signal=68%
KEGG_AXON_GUIDANCE	KEGG_AXON_GUIDANCE	Details ...	129	0.492232	1.56802	0.0292969	0.0757489	0.639	16617	tags=53%, list=30%, signal=76%
KEGG_RIBOFLAVIN_METABOLISM	KEGG_RIBOFLAVIN_METABOLISM	Details ...	16	0.568914	1.53588	0.0305927	0.0880989	0.695	6168	tags=38%, list=11%, signal=42%
KEGG_PATHOGENIC_ESCHERICHIA_COLI_INFECTION	KEGG_PATHOGENIC_ESCHERICHIA_COLI_INFECTION	Details ...	56	0.553905	1.57253	0.036	0.0747858	0.633	9077	tags=50%, list=16%, signal=60%
KEGG_AMINO_SUGAR_AND_NUCLEOTIDE_SUGAR_METABOLISM	KEGG_AMINO_SUGAR_AND_NUCLEOTIDE_SUGAR_METABOLISM	Details ...	44	0.492142	1.57477	0.0432099	0.0750987	0.631	19269	tags=64%, list=35%, signal=98%
KEGG_GAP_JUNCTION	KEGG_GAP_JUNCTION	Details ...	90	0.476573	1.51129	0.0470588	0.0989028	0.743	14274	tags=46%, list=26%, signal=61%
KEGG_TGF_BETA_SIGNALING_PATHWAY	KEGG_TGF_BETA_SIGNALING_PATHWAY	Details ...	86	0.504754	1.59121	0.0476191	0.0696622	0.595	6378	tags=31%, list=12%, signal=35%
KEGG_APOPTOSIS	KEGG_APOPTOSIS	Details ...	87	0.48263	1.50121	0.0557769	0.10372	0.758	15728	tags=52%, list=28%, signal=72%
KEGG_LONG_TERM_DEPRESSION	KEGG_LONG_TERM_DEPRESSION	Details ...	70	0.441071	1.45988	0.056338	0.125831	0.826	16373	tags=46%, list=30%, signal=65%
KEGG_PROTEASOME	KEGG_PROTEASOME	Details ...	46	0.617822	1.55752	0.0592885	0.0788826	0.66	11109	tags=52%, list=20%, signal=65%
KEGG_T_CELL_RECEPTOR_SIGNALING_PATHWAY	KEGG_T_CELL_RECEPTOR_SIGNALING_PATHWAY	Details ...	108	0.522746	1.52535	0.0644531	0.0916491	0.715	9305	tags=39%, list=17%, signal=47%
KEGG_BASAL_CELL_CARCINOMA	KEGG_BASAL_CELL_CARCINOMA	Details ...	55	0.454994	1.394	0.0697674	0.167067	0.916	14613	tags=38%, list=26%, signal=52%
KEGG_NOD_LIKE_RECEPTOR_SIGNALING_PATHWAY	KEGG_NOD_LIKE_RECEPTOR_SIGNALING_PATHWAY	Details ...	62	0.502511	1.48036	0.0708502	0.115043	0.796	22031	tags=73%, list=40%, signal=120%
KEGG_LYSINE_DEGRADATION	KEGG_LYSINE_DEGRADATION	Details ...	44	0.51195	1.5257	0.0724346	0.0926397	0.715	7240	tags=43%, list=13%, signal=50%
KEGG_OTHER_GLYCAN_DEGRADATION	KEGG_OTHER_GLYCAN_DEGRADATION	Details ...	16	0.600903	1.53924	0.0733198	0.087279	0.691	5546	tags=44%, list=10%, signal=49%
KEGG_HEDGEHOG_SIGNALING_PATHWAY	KEGG_HEDGEHOG_SIGNALING_PATHWAY	Details ...	56	0.45747	1.39736	0.0742972	0.166577	0.914	13220	tags=36%, list=24%, signal=47%
KEGG_TOLL_LIKE_RECEPTOR_SIGNALING_PATHWAY	KEGG_TOLL_LIKE_RECEPTOR_SIGNALING_PATHWAY	Details ...	102	0.462089	1.48422	0.0784708	0.113861	0.791	20641	tags=55%, list=37%, signal=87%
KEGG_MELANOMA	KEGG_MELANOMA	Details ...	71	0.413818	1.36132	0.0788955	0.188429	0.943	16529	tags=38%, list=30%, signal=54%
KEGG_GLYCOSPHINGOLIPID_BIOSYNTHESIS_LACTO_AND_NEOLACTO_SERIES	KEGG_GLYCOSPHINGOLIPID_BIOSYNTHESIS_LACTO_AND_NEOLACTO_SERIES	Details ...	26	0.478499	1.42798	0.083499	0.149896	0.875	20427	tags=54%, list=37%, signal=85%
KEGG_PROTEIN_EXPORT	KEGG_PROTEIN_EXPORT	Details ...	24	0.54991	1.47588	0.0836653	0.116351	0.802	19043	tags=71%, list=34%, signal=108%
KEGG_FC_EPSILON_RI_SIGNALING_PATHWAY	KEGG_FC_EPSILON_RI_SIGNALING_PATHWAY	Details ...	79	0.431235	1.39846	0.0884086	0.167406	0.91	21467	tags=58%, list=39%, signal=95%
KEGG_GLYCOSAMINOGLYCAN_DEGRADATION	KEGG_GLYCOSAMINOGLYCAN_DEGRADATION	Details ...	21	0.513306	1.39266	0.0965795	0.166172	0.916	20513	tags=67%, list=37%, signal=106%
KEGG_ARRHYTHMOGENIC_RIGHT_VENTRICULAR_CARDIOMYOPATHY_ARVC	KEGG_ARRHYTHMOGENIC_RIGHT_VENTRICULAR_CARDIOMYOPATHY_ARVC	Details ...	74	0.454826	1.40659	0.10101	0.164103	0.902	13986	tags=45%, list=25%, signal=60%
KEGG_HUNTINGTONS_DISEASE	KEGG_HUNTINGTONS_DISEASE	Details ...	182	0.419642	1.42572	0.103647	0.150016	0.875	14274	tags=37%, list=26%, signal=49%
KEGG_DORSO_VENTRAL_AXIS_FORMATION	KEGG_DORSO_VENTRAL_AXIS_FORMATION	Details ...	24	0.515163	1.40403	0.109127	0.164385	0.904	14939	tags=54%, list=27%, signal=74%
KEGG_CYSTEINE_AND_METHIONINE_METABOLISM	KEGG_CYSTEINE_AND_METHIONINE_METABOLISM	Details ...	34	0.434843	1.38219	0.109195	0.173354	0.922	10900	tags=50%, list=20%, signal=62%
KEGG_AMYOTROPHIC_LATERAL_SCLEROSIS_ALS	KEGG_AMYOTROPHIC_LATERAL_SCLEROSIS_ALS	Details ...	53	0.381518	1.31805	0.112403	0.215766	0.961	20296	tags=51%, list=37%, signal=80%
KEGG_GLYCOSAMINOGLYCAN_BIOSYNTHESIS_KERATAN_SULFATE	KEGG_GLYCOSAMINOGLYCAN_BIOSYNTHESIS_KERATAN_SULFATE	Details ...	15	0.543407	1.36119	0.11359	0.186402	0.943	19775	tags=67%, list=36%, signal=104%
KEGG_FRUCTOSE_AND_MANNOSE_METABOLISM	KEGG_FRUCTOSE_AND_MANNOSE_METABOLISM	Details ...	34	0.424958	1.36083	0.118609	0.184536	0.943	15868	tags=59%, list=29%, signal=82%
KEGG_TYPE_II_DIABETES_MELLITUS	KEGG_TYPE_II_DIABETES_MELLITUS	Details ...	47	0.413124	1.33359	0.122984	0.203997	0.954	7411	tags=26%, list=13%, signal=29%
KEGG_ADIPOCYTOKINE_SIGNALING_PATHWAY	KEGG_ADIPOCYTOKINE_SIGNALING_PATHWAY	Details ...	67	0.375414	1.30514	0.125506	0.22545	0.963	11078	tags=31%, list=20%, signal=39%
KEGG_GLUTATHIONE_METABOLISM	KEGG_GLUTATHIONE_METABOLISM	Details ...	49	0.385462	1.27062	0.144841	0.248018	0.97	14091	tags=37%, list=25%, signal=49%
KEGG_FOCAL_ADHESION	KEGG_FOCAL_ADHESION	Details ...	199	0.408611	1.33807	0.156673	0.201839	0.952	16385	tags=41%, list=30%, signal=58%
KEGG_ETHER_LIPID_METABOLISM	KEGG_ETHER_LIPID_METABOLISM	Details ...	33	0.413279	1.28679	0.160256	0.23523	0.966	17982	tags=52%, list=33%, signal=76%
KEGG_TASTE_TRANSDUCTION	KEGG_TASTE_TRANSDUCTION		51	0.385218	1.22995	0.168699	0.27601	0.982	21823	tags=49%, list=39%, signal=81%
KEGG_GLYCOSAMINOGLYCAN_BIOSYNTHESIS_HEPARAN_SULFATE	KEGG_GLYCOSAMINOGLYCAN_BIOSYNTHESIS_HEPARAN_SULFATE	Details ...	26	0.463987	1.29358	0.179842	0.231423	0.966	13560	tags=38%, list=25%, signal=51%
KEGG_ALDOSTERONE_REGULATED_SODIUM_REABSORPTION	KEGG_ALDOSTERONE_REGULATED_SODIUM_REABSORPTION	Details ...	42	0.390167	1.23444	0.182	0.276884	0.979	11177	tags=26%, list=20%, signal=33%
KEGG_B_CELL_RECEPTOR_SIGNALING_PATHWAY	KEGG_B_CELL_RECEPTOR_SIGNALING_PATHWAY	Details ...	75	0.443221	1.29518	0.206827	0.232263	0.966	9305	tags=31%, list=17%, signal=37%
KEGG_ALZHEIMERS_DISEASE	KEGG_ALZHEIMERS_DISEASE		166	0.353971	1.23086	0.212062	0.277756	0.982	15728	tags=34%, list=28%, signal=47%
KEGG_CHEMOKINE_SIGNALING_PATHWAY	KEGG_CHEMOKINE_SIGNALING_PATHWAY	Details ...	188	0.388064	1.24349	0.229541	0.272985	0.977	20181	tags=46%, list=36%, signal=72%
KEGG_NATURAL_KILLER_CELL_MEDIATED_CYTOTOXICITY	KEGG_NATURAL_KILLER_CELL_MEDIATED_CYTOTOXICITY	Details ...	132	0.400249	1.23692	0.231405	0.277296	0.979	22139	tags=45%, list=40%, signal=74%
KEGG_PENTOSE_PHOSPHATE_PATHWAY	KEGG_PENTOSE_PHOSPHATE_PATHWAY		27	0.398822	1.19265	0.2334	0.312978	0.987	13217	tags=41%, list=24%, signal=54%
KEGG_LEUKOCYTE_TRANSENDOTHELIAL_MIGRATION	KEGG_LEUKOCYTE_TRANSENDOTHELIAL_MIGRATION		116	0.369611	1.19023	0.249516	0.312624	0.987	10817	tags=29%, list=20%, signal=36%
KEGG_JAK_STAT_SIGNALING_PATHWAY	KEGG_JAK_STAT_SIGNALING_PATHWAY		155	0.351402	1.18969	0.250501	0.310239	0.987	18987	tags=39%, list=34%, signal=59%
KEGG_GALACTOSE_METABOLISM	KEGG_GALACTOSE_METABOLISM		26	0.384089	1.15107	0.259635	0.346449	0.993	20892	tags=50%, list=38%, signal=80%
KEGG_ABC_TRANSPORTERS	KEGG_ABC_TRANSPORTERS		44	0.342791	1.12853	0.271984	0.361825	0.994	15295	tags=39%, list=28%, signal=53%
KEGG_GLYCOSAMINOGLYCAN_BIOSYNTHESIS_CHONDROITIN_SULFATE	KEGG_GLYCOSAMINOGLYCAN_BIOSYNTHESIS_CHONDROITIN_SULFATE		22	0.454255	1.17498	0.283495	0.323365	0.988	9482	tags=32%, list=17%, signal=38%
KEGG_HYPERTROPHIC_CARDIOMYOPATHY_HCM	KEGG_HYPERTROPHIC_CARDIOMYOPATHY_HCM		83	0.354431	1.1377	0.287755	0.354658	0.994	20027	tags=46%, list=36%, signal=72%
KEGG_GLYCEROLIPID_METABOLISM	KEGG_GLYCEROLIPID_METABOLISM		49	0.31513	1.11947	0.292181	0.365115	0.994	21378	tags=47%, list=39%, signal=76%
KEGG_ANTIGEN_PROCESSING_AND_PRESENTATION	KEGG_ANTIGEN_PROCESSING_AND_PRESENTATION		81	0.409758	1.14708	0.340426	0.347988	0.993	4977	tags=15%, list=9%, signal=16%
KEGG_VASCULAR_SMOOTH_MUSCLE_CONTRACTION	KEGG_VASCULAR_SMOOTH_MUSCLE_CONTRACTION		115	0.326614	1.11131	0.340681	0.372033	0.995	14316	tags=34%, list=26%, signal=46%
KEGG_STEROID_BIOSYNTHESIS	KEGG_STEROID_BIOSYNTHESIS		17	0.47449	1.12826	0.348269	0.358891	0.994	19081	tags=59%, list=34%, signal=90%
KEGG_PANTOTHENATE_AND_COA_BIOSYNTHESIS	KEGG_PANTOTHENATE_AND_COA_BIOSYNTHESIS		16	0.392612	1.07762	0.37069	0.407895	0.997	17157	tags=56%, list=31%, signal=82%
KEGG_MATURITY_ONSET_DIABETES_OF_THE_YOUNG	KEGG_MATURITY_ONSET_DIABETES_OF_THE_YOUNG		25	0.366564	1.04435	0.40159	0.445853	0.998	18554	tags=40%, list=34%, signal=60%
KEGG_SYSTEMIC_LUPUS_ERYTHEMATOSUS	KEGG_SYSTEMIC_LUPUS_ERYTHEMATOSUS		135	0.305729	1.01705	0.417178	0.478148	0.999	18773	tags=44%, list=34%, signal=66%
KEGG_DILATED_CARDIOMYOPATHY	KEGG_DILATED_CARDIOMYOPATHY		90	0.317497	1.01397	0.421371	0.478436	1	20102	tags=46%, list=36%, signal=71%
KEGG_ONE_CARBON_POOL_BY_FOLATE	KEGG_ONE_CARBON_POOL_BY_FOLATE		17	0.350815	1.01196	0.423387	0.477444	1	17661	tags=59%, list=32%, signal=86%
KEGG_PORPHYRIN_AND_CHLOROPHYLL_METABOLISM	KEGG_PORPHYRIN_AND_CHLOROPHYLL_METABOLISM		41	0.315537	0.963958	0.477912	0.519354	1	5380	tags=20%, list=10%, signal=22%
KEGG_CARDIAC_MUSCLE_CONTRACTION	KEGG_CARDIAC_MUSCLE_CONTRACTION		79	0.297457	0.980099	0.482	0.506578	1	16827	tags=30%, list=30%, signal=44%
KEGG_CALCIUM_SIGNALING_PATHWAY	KEGG_CALCIUM_SIGNALING_PATHWAY		178	0.279848	0.983141	0.495816	0.507039	1	18140	tags=34%, list=33%, signal=50%
KEGG_LEISHMANIA_INFECTION	KEGG_LEISHMANIA_INFECTION		70	0.363077	0.978785	0.512295	0.504016	1	9941	tags=27%, list=18%, signal=33%
KEGG_O_GLYCAN_BIOSYNTHESIS	KEGG_O_GLYCAN_BIOSYNTHESIS		30	0.347458	0.947176	0.513347	0.53703	1	16109	tags=43%, list=29%, signal=61%
KEGG_RIBOSOME	KEGG_RIBOSOME		88	0.484119	0.996588	0.513812	0.493951	1	21661	tags=72%, list=39%, signal=117%
KEGG_PENTOSE_AND_GLUCURONATE_INTERCONVERSIONS	KEGG_PENTOSE_AND_GLUCURONATE_INTERCONVERSIONS		28	0.311596	0.85446	0.604888	0.665045	1	19510	tags=50%, list=35%, signal=77%
KEGG_PRIMARY_IMMUNODEFICIENCY	KEGG_PRIMARY_IMMUNODEFICIENCY		35	0.35042	0.793303	0.681018	0.733347	1	29932	tags=60%, list=54%, signal=131%
KEGG_ALPHA_LINOLENIC_ACID_METABOLISM	KEGG_ALPHA_LINOLENIC_ACID_METABOLISM		19	0.283762	0.844582	0.727459	0.673906	1	17162	tags=37%, list=31%, signal=53%
KEGG_NICOTINATE_AND_NICOTINAMIDE_METABOLISM	KEGG_NICOTINATE_AND_NICOTINAMIDE_METABOLISM		24	0.275649	0.836533	0.729339	0.680429	1	9523	tags=25%, list=17%, signal=30%
KEGG_VIRAL_MYOCARDITIS	KEGG_VIRAL_MYOCARDITIS		68	0.262622	0.752804	0.744898	0.788577	1	8424	tags=16%, list=15%, signal=19%
KEGG_TYPE_I_DIABETES_MELLITUS	KEGG_TYPE_I_DIABETES_MELLITUS		41	0.275191	0.67552	0.758285	0.884715	1	29118	tags=49%, list=53%, signal=103%
KEGG_OXIDATIVE_PHOSPHORYLATION	KEGG_OXIDATIVE_PHOSPHORYLATION		132	0.229136	0.675309	0.76938	0.878327	1	8404	tags=15%, list=15%, signal=18%
KEGG_CYTOKINE_CYTOKINE_RECEPTOR_INTERACTION	KEGG_CYTOKINE_CYTOKINE_RECEPTOR_INTERACTION		264	0.220704	0.744667	0.784836	0.795035	1	23492	tags=38%, list=42%, signal=65%
KEGG_PARKINSONS_DISEASE	KEGG_PARKINSONS_DISEASE		130	0.215549	0.654554	0.808219	0.895928	1	18644	tags=27%, list=34%, signal=41%
KEGG_INTESTINAL_IMMUNE_NETWORK_FOR_IGA_PRODUCTION	KEGG_INTESTINAL_IMMUNE_NETWORK_FOR_IGA_PRODUCTION		46	0.234845	0.593897	0.831373	0.944995	1	29932	tags=57%, list=54%, signal=123%
KEGG_OLFACTORY_TRANSDUCTION	KEGG_OLFACTORY_TRANSDUCTION		386	0.181342	0.835269	0.858333	0.676953	1	30189	tags=33%, list=55%, signal=71%
KEGG_BIOSYNTHESIS_OF_UNSATURATED_FATTY_ACIDS	KEGG_BIOSYNTHESIS_OF_UNSATURATED_FATTY_ACIDS		22	0.24429	0.649794	0.87605	0.895123	1	23648	tags=45%, list=43%, signal=79%
KEGG_CELL_ADHESION_MOLECULES_CAMS	KEGG_CELL_ADHESION_MOLECULES_CAMS		131	0.188678	0.585877	0.922631	0.944426	1	10740	tags=15%, list=19%, signal=19%
KEGG_ALLOGRAFT_REJECTION	KEGG_ALLOGRAFT_REJECTION		35	0.203603	0.453185	0.934	0.989707	1	28870	tags=43%, list=52%, signal=90%
KEGG_HEMATOPOIETIC_CELL_LINEAGE	KEGG_HEMATOPOIETIC_CELL_LINEAGE		85	0.195141	0.565597	0.95679	0.952972	1	29076	tags=49%, list=53%, signal=104%
gsea_report_for_l_
NAME	GS<br> follow link to MSigDB	GS DETAILS	SIZE	ES	NES	NOM p-val	FDR q-val	FWER p-val	RANK AT MAX	LEADING EDGE
KEGG_COMPLEMENT_AND_COAGULATION_CASCADES	KEGG_COMPLEMENT_AND_COAGULATION_CASCADES	Details ...	69	-0.841553	-2.3759	0	0	0	2281	tags=59%, list=4%, signal=62%
KEGG_PRIMARY_BILE_ACID_BIOSYNTHESIS	KEGG_PRIMARY_BILE_ACID_BIOSYNTHESIS	Details ...	16	-0.848987	-1.84728	0.004158	0.0648388	0.116	3382	tags=63%, list=6%, signal=67%
KEGG_FATTY_ACID_METABOLISM	KEGG_FATTY_ACID_METABOLISM	Details ...	42	-0.735777	-1.80252	0.019685	0.0698316	0.188	2089	tags=57%, list=4%, signal=59%
KEGG_RETINOL_METABOLISM	KEGG_RETINOL_METABOLISM	Details ...	64	-0.604234	-1.78028	0.0211946	0.0650276	0.226	3570	tags=48%, list=6%, signal=52%
KEGG_TRYPTOPHAN_METABOLISM	KEGG_TRYPTOPHAN_METABOLISM	Details ...	40	-0.604968	-1.69466	0.024	0.110227	0.378	3259	tags=50%, list=6%, signal=53%
KEGG_PPAR_SIGNALING_PATHWAY	KEGG_PPAR_SIGNALING_PATHWAY	Details ...	69	-0.497412	-1.60369	0.0288462	0.139201	0.576	2717	tags=38%, list=5%, signal=40%
KEGG_GLYCINE_SERINE_AND_THREONINE_METABOLISM	KEGG_GLYCINE_SERINE_AND_THREONINE_METABOLISM	Details ...	31	-0.632941	-1.66195	0.0382294	0.120157	0.447	3110	tags=61%, list=6%, signal=65%
KEGG_DRUG_METABOLISM_CYTOCHROME_P450	KEGG_DRUG_METABOLISM_CYTOCHROME_P450	Details ...	71	-0.541487	-1.59319	0.0536779	0.133778	0.591	3570	tags=48%, list=6%, signal=51%
KEGG_VALINE_LEUCINE_AND_ISOLEUCINE_DEGRADATION	KEGG_VALINE_LEUCINE_AND_ISOLEUCINE_DEGRADATION	Details ...	44	-0.664294	-1.62281	0.0579151	0.138854	0.528	3259	tags=55%, list=6%, signal=58%
KEGG_LINOLEIC_ACID_METABOLISM	KEGG_LINOLEIC_ACID_METABOLISM	Details ...	29	-0.470351	-1.40827	0.0721248	0.304086	0.889	5455	tags=52%, list=10%, signal=57%
KEGG_ARGININE_AND_PROLINE_METABOLISM	KEGG_ARGININE_AND_PROLINE_METABOLISM	Details ...	54	-0.426183	-1.36265	0.0951374	0.325136	0.925	3259	tags=43%, list=6%, signal=45%
KEGG_BETA_ALANINE_METABOLISM	KEGG_BETA_ALANINE_METABOLISM	Details ...	22	-0.55899	-1.44601	0.0974659	0.274233	0.85	3259	tags=55%, list=6%, signal=58%
KEGG_ALANINE_ASPARTATE_AND_GLUTAMATE_METABOLISM	KEGG_ALANINE_ASPARTATE_AND_GLUTAMATE_METABOLISM	Details ...	32	-0.435858	-1.38779	0.0978044	0.312028	0.909	2171	tags=47%, list=4%, signal=49%
KEGG_BUTANOATE_METABOLISM	KEGG_BUTANOATE_METABOLISM	Details ...	34	-0.555464	-1.46902	0.104449	0.267798	0.828	3259	tags=50%, list=6%, signal=53%
KEGG_ARACHIDONIC_ACID_METABOLISM	KEGG_ARACHIDONIC_ACID_METABOLISM	Details ...	58	-0.358326	-1.28585	0.105566	0.35635	0.975	1150	tags=21%, list=2%, signal=21%
KEGG_TYROSINE_METABOLISM	KEGG_TYROSINE_METABOLISM	Details ...	42	-0.429181	-1.34307	0.108108	0.311722	0.94	1974	tags=38%, list=4%, signal=39%
KEGG_PROPANOATE_METABOLISM	KEGG_PROPANOATE_METABOLISM	Details ...	33	-0.527075	-1.35124	0.161959	0.319867	0.931	2362	tags=42%, list=4%, signal=44%
KEGG_METABOLISM_OF_XENOBIOTICS_BY_CYTOCHROME_P450	KEGG_METABOLISM_OF_XENOBIOTICS_BY_CYTOCHROME_P450	Details ...	69	-0.427486	-1.28261	0.185629	0.342667	0.976	3570	tags=39%, list=6%, signal=42%
KEGG_PHENYLALANINE_METABOLISM	KEGG_PHENYLALANINE_METABOLISM	Details ...	18	-0.476174	-1.29289	0.186373	0.366571	0.975	3320	tags=50%, list=6%, signal=53%
KEGG_PRION_DISEASES	KEGG_PRION_DISEASES	Details ...	35	-0.407803	-1.24918	0.207436	0.370736	0.983	1132	tags=31%, list=2%, signal=32%
KEGG_HISTIDINE_METABOLISM	KEGG_HISTIDINE_METABOLISM	Details ...	29	-0.367563	-1.11769	0.316532	0.527407	0.998	3259	tags=45%, list=6%, signal=48%
KEGG_PEROXISOME	KEGG_PEROXISOME	Details ...	78	-0.372801	-1.12772	0.316832	0.535497	0.997	2583	tags=36%, list=5%, signal=38%
KEGG_STEROID_HORMONE_BIOSYNTHESIS	KEGG_STEROID_HORMONE_BIOSYNTHESIS	Details ...	55	-0.371293	-1.09715	0.339882	0.538464	1	3570	tags=29%, list=6%, signal=31%
KEGG_GLYOXYLATE_AND_DICARBOXYLATE_METABOLISM	KEGG_GLYOXYLATE_AND_DICARBOXYLATE_METABOLISM	Details ...	16	-0.405345	-1.09596	0.352031	0.517803	1	717	tags=31%, list=1%, signal=32%
KEGG_PYRUVATE_METABOLISM	KEGG_PYRUVATE_METABOLISM	Details ...	40	-0.346225	-1.07729	0.370301	0.526416	1	2089	tags=30%, list=4%, signal=31%
KEGG_STARCH_AND_SUCROSE_METABOLISM	KEGG_STARCH_AND_SUCROSE_METABOLISM	Details ...	52	-0.318306	-1.01537	0.420857	0.60104	1	3468	tags=27%, list=6%, signal=29%
KEGG_DRUG_METABOLISM_OTHER_ENZYMES	KEGG_DRUG_METABOLISM_OTHER_ENZYMES	Details ...	51	-0.320148	-1.00796	0.433852	0.591386	1	3008	tags=35%, list=5%, signal=37%
KEGG_GLYCOLYSIS_GLUCONEOGENESIS	KEGG_GLYCOLYSIS_GLUCONEOGENESIS	Details ...	62	-0.292414	-0.992395	0.464217	0.594723	1	3468	tags=27%, list=6%, signal=29%
KEGG_PROXIMAL_TUBULE_BICARBONATE_RECLAMATION	KEGG_PROXIMAL_TUBULE_BICARBONATE_RECLAMATION	Details ...	23	-0.337911	-0.974832	0.507216	0.600882	1	3091	tags=30%, list=6%, signal=32%
KEGG_CITRATE_CYCLE_TCA_CYCLE	KEGG_CITRATE_CYCLE_TCA_CYCLE	Details ...	31	-0.350537	-0.914996	0.552381	0.673488	1	1697	tags=32%, list=3%, signal=33%
KEGG_NITROGEN_METABOLISM	KEGG_NITROGEN_METABOLISM	Details ...	23	-0.307498	-0.894873	0.634538	0.683392	1	3091	tags=30%, list=6%, signal=32%
KEGG_GRAFT_VERSUS_HOST_DISEASE	KEGG_GRAFT_VERSUS_HOST_DISEASE	Details ...	37	-0.32102	-0.701137	0.730382	0.896105	1	37572	tags=100%, list=68%, signal=312%
KEGG_ASCORBATE_AND_ALDARATE_METABOLISM	KEGG_ASCORBATE_AND_ALDARATE_METABOLISM	Details ...	25	-0.300828	-0.749119	0.737864	0.873284	1	483	tags=16%, list=1%, signal=16%
KEGG_RENIN_ANGIOTENSIN_SYSTEM	KEGG_RENIN_ANGIOTENSIN_SYSTEM	Details ...	17	-0.320511	-0.810385	0.744597	0.796982	1	2819	tags=35%, list=5%, signal=37%
KEGG_AUTOIMMUNE_THYROID_DISEASE	KEGG_AUTOIMMUNE_THYROID_DISEASE	Details ...	50	-0.261024	-0.666678	0.769539	0.89305	1	40892	tags=100%, list=74%, signal=383%
KEGG_ECM_RECEPTOR_INTERACTION	KEGG_ECM_RECEPTOR_INTERACTION	Details ...	84	-0.229015	-0.711105	0.786853	0.907558	1	3748	tags=25%, list=7%, signal=27%
KEGG_ASTHMA	KEGG_ASTHMA	Details ...	28	-0.26092	-0.651809	0.801158	0.864891	1	40892	tags=100%, list=74%, signal=383%
KEGG_TERPENOID_BACKBONE_BIOSYNTHESIS	KEGG_TERPENOID_BACKBONE_BIOSYNTHESIS	Details ...	15	-0.271747	-0.679175	0.84658	0.901621	1	160	tags=13%, list=0%, signal=13%
KEGG_NEUROACTIVE_LIGAND_RECEPTOR_INTERACTION	KEGG_NEUROACTIVE_LIGAND_RECEPTOR_INTERACTION	Details ...	270	-0.174389	-0.653276	0.998058	0.88586	1	3094	tags=16%, list=6%, signal=17%
